# Supplementary material
Source: PubMed Central journal article supplement (PMC4063438)
Supplement: NIHMS589790-supplement-Supplementary_Table_1.pdf [file NIHMS589790-supplement-Supplementary_Table_1.pdf]

**Supplementary Table 1: Proteins identified by 5 hour puromycin-SILAC screen**

| Protein IDs      | Peptides | Sequence | PEP (p value o | Ratio H/M Normalized (Veh/Hal) |          |  |
|------------------|----------|----------|----------------|--------------------------------|----------|--|
| IPI:IPI00648173; | 11.0000  | 7.6000   | 0.0000         | 1.0818                         | clathrin |  |
| IPI:IPI00203214; | 8.0000   | 8.7000   | 0.0000         | 0.9020                         | eEF2     |  |
| IPI:IPI00231051; | 34.0000  | 23.3000  | 0.0000         | 0.8102                         | MAP2     |  |
| IPI:IPI00113655; | 2.0000   | 8.0000   | 0.0000         | 0.0070                         | RpS6     |  |
| IPI:IPI00464307; | 2.0000   | 1.1000   | 0.0000         | 2.6416                         |          |  |
| IPI:IPI00130238; | 5.0000   | 2.2000   | 0.0000         | 2.1193                         |          |  |
| IPI:IPI00776833; | 2.0000   | 8.2000   | 0.0000         | 1.9984                         |          |  |
| IPI:IPI00360340; | 2.0000   | 4.3000   | 0.0008         | 1.9925                         |          |  |
| IPI:IPI00367304; | 3.0000   | 3.7000   | 0.0000         | 1.8871                         |          |  |
| IPI:IPI00190261; | 2.0000   | 5.9000   | 0.0013         | 1.8665                         |          |  |
| IPI:IPI00209916; | 3.0000   | 6.9000   | 0.0000         | 1.7936                         |          |  |
| IPI:IPI00188859; | 4.0000   | 1.9000   | 0.0000         | 1.7636                         |          |  |
| IPI:IPI00231697; | 3.0000   | 18.1000  | 0.0000         | 1.6661                         |          |  |
| IPI:IPI00210357; | 3.0000   | 10.8000  | 0.0000         | 1.6573                         |          |  |
| IPI:IPI00798592; | 42.0000  | 20.5000  | 0.0000         | 1.5972                         |          |  |
| IPI:IPI00209258; | 46.0000  | 22.9000  | 0.0000         | 1.5530                         |          |  |
| IPI:IPI00757312; | 8.0000   | 4.5000   | 0.0000         | 1.5424                         |          |  |
| IPI:IPI00554111; | 7.0000   | 2.5000   | 0.0000         | 1.5382                         |          |  |
| IPI:IPI00205566; | 2.0000   | 7.6000   | 0.0004         | 1.4853                         |          |  |
| IPI:IPI00652316; | 3.0000   | 3.2000   | 0.0000         | 1.4795                         |          |  |
| IPI:IPI00369169; | 2.0000   | 3.1000   | 0.0000         | 1.4725                         |          |  |
| IPI:IPI00553419; | 12.0000  | 4.2000   | 0.0000         | 1.4607                         |          |  |
| IPI:IPI00370815; | 9.0000   | 17.5000  | 0.0000         | 1.4414                         |          |  |
| IPI:IPI00231502; | 3.0000   | 3.8000   | 0.0000         | 1.4308                         |          |  |
| IPI:IPI00229510; | 4.0000   | 11.4000  | 0.0000         | 1.4171                         |          |  |
| IPI:IPI00768734; | 2.0000   | 3.3000   | 0.0005         | 1.4054                         |          |  |
| IPI:IPI00468203; | 4.0000   | 13.6000  | 0.0000         | 1.3965                         |          |  |

|                  |         |         |        |        |  |  |
|------------------|---------|---------|--------|--------|--|--|
| IPI:IPI00122971; | 9.0000  | 11.3000 | 0.0000 | 1.3769 |  |  |
| IPI:IPI00208213; | 2.0000  | 9.8000  | 0.0003 | 1.3746 |  |  |
| IPI:IPI00207217; | 2.0000  | 10.7000 | 0.0000 | 1.3611 |  |  |
| IPI:IPI00190020; | 5.0000  | 8.2000  | 0.0000 | 1.3553 |  |  |
| IPI:IPI00778098; | 3.0000  | 6.2000  | 0.0000 | 1.3312 |  |  |
| IPI:IPI00198101; | 5.0000  | 5.1000  | 0.0000 | 1.3249 |  |  |
| IPI:IPI00667973; | 10.0000 | 8.0000  | 0.0000 | 1.3248 |  |  |
| IPI:IPI00190377; | 6.0000  | 16.6000 | 0.0000 | 1.3241 |  |  |
| IPI:IPI00230191; | 2.0000  | 5.0000  | 0.0000 | 1.3240 |  |  |
| IPI:IPI00870772; | 5.0000  | 8.6000  | 0.0000 | 1.3181 |  |  |
| IPI:IPI00777884; | 3.0000  | 11.0000 | 0.0000 | 1.3022 |  |  |
| IPI:IPI00368473; | 5.0000  | 3.3000  | 0.0000 | 1.3017 |  |  |
| IPI:IPI00205912; | 11.0000 | 24.2000 | 0.0000 | 1.3008 |  |  |
| IPI:IPI00780256; | 2.0000  | 7.9000  | 0.0000 | 1.2937 |  |  |
| IPI:IPI00321266; | 2.0000  | 3.3000  | 0.0004 | 1.2895 |  |  |
| IPI:IPI00466120; | 8.0000  | 17.0000 | 0.0000 | 1.2808 |  |  |
| IPI:IPI00190687; | 2.0000  | 2.6000  | 0.0000 | 1.2807 |  |  |
| IPI:IPI00421137; | 21.0000 | 28.3000 | 0.0000 | 1.2807 |  |  |
| IPI:IPI00328017  | 34.0000 | 23.6000 | 0.0000 | 1.2784 |  |  |
| IPI:IPI00766861; | 9.0000  | 15.2000 | 0.0000 | 1.2774 |  |  |
| IPI:IPI00363763; | 2.0000  | 3.3000  | 0.0000 | 1.2728 |  |  |
| IPI:IPI00204051; | 3.0000  | 2.6000  | 0.0000 | 1.2703 |  |  |
| IPI:IPI00109420  | 13.0000 | 14.4000 | 0.0000 | 1.2694 |  |  |
| IPI:IPI00117352; | 12.0000 | 24.3000 | 0.0000 | 1.2590 |  |  |
| IPI:IPI00362117; | 2.0000  | 4.5000  | 0.0001 | 1.2506 |  |  |
| IPI:IPI00368347; | 6.0000  | 7.9000  | 0.0000 | 1.2463 |  |  |
| IPI:IPI00200661; | 6.0000  | 3.0000  | 0.0000 | 1.2407 |  |  |
| IPI:IPI00225609; | 10.0000 | 18.3000 | 0.0000 | 1.2324 |  |  |
| IPI:IPI00209618; | 4.0000  | 7.2000  | 0.0000 | 1.2212 |  |  |

|                  |         |         |        |        |  |  |
|------------------|---------|---------|--------|--------|--|--|
| IPI:IPI00118384; | 9.0000  | 32.9000 | 0.0000 | 1.2190 |  |  |
| IPI:IPI00189779; | 4.0000  | 5.1000  | 0.0000 | 1.2190 |  |  |
| IPI:IPI00231884; | 4.0000  | 7.8000  | 0.0000 | 1.2165 |  |  |
| IPI:IPI00231553; | 4.0000  | 10.9000 | 0.0000 | 1.2137 |  |  |
| IPI:IPI00188158; | 6.0000  | 13.8000 | 0.0000 | 1.2136 |  |  |
| IPI:IPI00655290; | 5.0000  | 14.4000 | 0.0000 | 1.2074 |  |  |
| IPI:IPI00368485; | 3.0000  | 2.7000  | 0.0013 | 1.2060 |  |  |
| IPI:IPI00623629; | 2.0000  | 5.3000  | 0.0031 | 1.2047 |  |  |
| IPI:IPI00853924; | 5.0000  | 14.2000 | 0.0000 | 1.2006 |  |  |
| IPI:IPI00213633; | 4.0000  | 4.3000  | 0.0000 | 1.1928 |  |  |
| IPI:IPI00204322; | 4.0000  | 5.8000  | 0.0000 | 1.1927 |  |  |
| IPI:IPI00122965; | 3.0000  | 15.9000 | 0.0012 | 1.1926 |  |  |
| IPI:IPI00366479; | 4.0000  | 7.8000  | 0.0000 | 1.1925 |  |  |
| IPI:IPI00324741; | 6.0000  | 13.7000 | 0.0000 | 1.1852 |  |  |
| IPI:IPI00474883; | 4.0000  | 15.0000 | 0.0000 | 1.1835 |  |  |
| IPI:IPI00777510; | 4.0000  | 12.1000 | 0.0000 | 1.1829 |  |  |
| IPI:IPI00828218; | 3.0000  | 1.7000  | 0.0000 | 1.1816 |  |  |
| IPI:IPI00561065; | 12.0000 | 21.1000 | 0.0000 | 1.1784 |  |  |
| IPI:IPI00382267; | 3.0000  | 6.9000  | 0.0000 | 1.1740 |  |  |
| IPI:IPI00563054; | 9.0000  | 6.5000  | 0.0000 | 1.1731 |  |  |
| IPI:IPI00565184; | 2.0000  | 2.2000  | 0.0000 | 1.1728 |  |  |
| IPI:IPI00421424; | 3.0000  | 2.9000  | 0.0000 | 1.1708 |  |  |
| IPI:IPI00308162; | 6.0000  | 10.8000 | 0.0000 | 1.1666 |  |  |
| IPI:IPI00203239; | 2.0000  | 1.9000  | 0.0000 | 1.1662 |  |  |
| IPI:IPI00325260; | 4.0000  | 14.3000 | 0.0001 | 1.1656 |  |  |
| IPI:IPI00358840; | 9.0000  | 6.1000  | 0.0000 | 1.1546 |  |  |
| IPI:IPI00230707; | 9.0000  | 34.0000 | 0.0000 | 1.1477 |  |  |
| IPI:IPI00210113; | 2.0000  | 1.4000  | 0.0006 | 1.1459 |  |  |
| IPI:IPI00312076; | 4.0000  | 6.9000  | 0.0000 | 1.1453 |  |  |

|                  |         |         |        |        |  |  |
|------------------|---------|---------|--------|--------|--|--|
| IPI:IPI00420559; | 2.0000  | 3.4000  | 0.0001 | 1.1431 |  |  |
| IPI:IPI00363563; | 3.0000  | 3.8000  | 0.0000 | 1.1373 |  |  |
| IPI:IPI00856379; | 2.0000  | 6.2000  | 0.0000 | 1.1356 |  |  |
| IPI:IPI00116498; | 7.0000  | 28.6000 | 0.0000 | 1.1330 |  |  |
| IPI:IPI00626501; | 12.0000 | 9.0000  | 0.0000 | 1.1321 |  |  |
| IPI:IPI00197728; | 2.0000  | 2.5000  | 0.0000 | 1.1319 |  |  |
| IPI:IPI00366215; | 6.0000  | 6.2000  | 0.0000 | 1.1309 |  |  |
| IPI:IPI00119870; | 8.0000  | 11.3000 | 0.0000 | 1.1305 |  |  |
| IPI:IPI00196506; | 5.0000  | 18.5000 | 0.0000 | 1.1300 |  |  |
| IPI:IPI00453826; | 10.0000 | 12.4000 | 0.0000 | 1.1240 |  |  |
| IPI:IPI00269613; | 3.0000  | 10.8000 | 0.0000 | 1.1233 |  |  |
| IPI:IPI00767105; | 2.0000  | 1.7000  | 0.0000 | 1.1222 |  |  |
| IPI:IPI00558791; | 2.0000  | 5.4000  | 0.0000 | 1.1218 |  |  |
| IPI:IPI00555125; | 17.0000 | 21.6000 | 0.0000 | 1.1204 |  |  |
| IPI:IPI00464718; | 8.0000  | 12.4000 | 0.0000 | 1.1184 |  |  |
| IPI:IPI00270326; | 3.0000  | 7.8000  | 0.0000 | 1.1164 |  |  |
| IPI:IPI00214192; | 2.0000  | 5.4000  | 0.0001 | 1.1161 |  |  |
| IPI:IPI00128155; | 3.0000  | 6.6000  | 0.0000 | 1.1137 |  |  |
| IPI:IPI00212014; | 12.0000 | 17.9000 | 0.0000 | 1.1103 |  |  |
| IPI:IPI00137227; | 2.0000  | 11.8000 | 0.0003 | 1.1084 |  |  |
| IPI:IPI00816946; | 6.0000  | 9.5000  | 0.0000 | 1.1074 |  |  |
| IPI:IPI00460720; | 3.0000  | 2.5000  | 0.0000 | 1.1040 |  |  |
| IPI:IPI00368692; | 15.0000 | 7.5000  | 0.0000 | 1.1034 |  |  |
| IPI:IPI00196703; | 9.0000  | 7.9000  | 0.0000 | 1.1028 |  |  |
| IPI:IPI00201561; | 3.0000  | 12.1000 | 0.0000 | 1.1019 |  |  |
| IPI:IPI00366835; | 2.0000  | 4.5000  | 0.0000 | 1.0991 |  |  |
| IPI:IPI00454288; | 2.0000  | 3.8000  | 0.0000 | 1.0923 |  |  |
| IPI:IPI00648092; | 9.0000  | 20.8000 | 0.0000 | 1.0910 |  |  |
| IPI:IPI00324986  | 4.0000  | 8.9000  | 0.0000 | 1.0903 |  |  |

|                  |         |         |        |        |  |  |
|------------------|---------|---------|--------|--------|--|--|
| IPI:IPI00763824; | 10.0000 | 7.6000  | 0.0000 | 1.0901 |  |  |
| IPI:IPI00365985; | 5.0000  | 7.1000  | 0.0000 | 1.0863 |  |  |
| IPI:IPI00870172; | 2.0000  | 5.3000  | 0.0000 | 1.0848 |  |  |
| IPI:IPI00778569; | 4.0000  | 5.4000  | 0.0000 | 1.0848 |  |  |
| IPI:IPI00465809; | 4.0000  | 5.8000  | 0.0000 | 1.0828 |  |  |
| IPI:IPI00231770; | 3.0000  | 8.1000  | 0.0000 | 1.0790 |  |  |
| IPI:IPI00321718; | 3.0000  | 9.4000  | 0.0000 | 1.0768 |  |  |
| IPI:IPI00389524; | 3.0000  | 4.0000  | 0.0000 | 1.0688 |  |  |
| IPI:IPI00421539; | 6.0000  | 9.1000  | 0.0000 | 1.0647 |  |  |
| IPI:IPI00331556; | 6.0000  | 9.2000  | 0.0000 | 1.0647 |  |  |
| IPI:IPI00373261; | 4.0000  | 4.9000  | 0.0000 | 1.0627 |  |  |
| IPI:IPI00319992; | 26.0000 | 43.2000 | 0.0000 | 1.0589 |  |  |
| IPI:IPI00203250; | 12.0000 | 21.8000 | 0.0000 | 1.0566 |  |  |
| IPI:IPI00338717; | 2.0000  | 2.4000  | 0.0031 | 1.0565 |  |  |
| IPI:IPI00391486; | 7.0000  | 14.9000 | 0.0000 | 1.0557 |  |  |
| IPI:IPI00420807; | 2.0000  | 7.7000  | 0.0000 | 1.0502 |  |  |
| IPI:IPI00192626; | 5.0000  | 7.3000  | 0.0000 | 1.0484 |  |  |
| IPI:IPI00203344; | 6.0000  | 17.3000 | 0.0000 | 1.0478 |  |  |
| IPI:IPI00114375; | 11.0000 | 24.1000 | 0.0000 | 1.0399 |  |  |
| IPI:IPI00137848; | 2.0000  | 4.4000  | 0.0000 | 1.0381 |  |  |
| IPI:IPI00830990; | 5.0000  | 9.8000  | 0.0000 | 1.0319 |  |  |
| IPI:IPI00231742; | 2.0000  | 5.3000  | 0.0000 | 1.0311 |  |  |
| IPI:IPI00363856; | 5.0000  | 2.2000  | 0.0000 | 1.0302 |  |  |
| IPI:IPI00119663; | 4.0000  | 10.3000 | 0.0000 | 1.0268 |  |  |
| IPI:IPI00420437; | 2.0000  | 4.2000  | 0.0000 | 1.0225 |  |  |
| IPI:IPI00190479; | 4.0000  | 7.3000  | 0.0000 | 1.0225 |  |  |
| IPI:IPI00781662; | 2.0000  | 1.4000  | 0.0009 | 1.0224 |  |  |
| IPI:IPI00128904; | 3.0000  | 11.2000 | 0.0000 | 1.0176 |  |  |
| IPI:IPI00776774; | 12.0000 | 9.9000  | 0.0000 | 1.0088 |  |  |

|                  |         |         |        |        |  |  |
|------------------|---------|---------|--------|--------|--|--|
| IPI:IPI00193595; | 5.0000  | 15.0000 | 0.0000 | 1.0072 |  |  |
| IPI:IPI00196508; | 3.0000  | 6.6000  | 0.0000 | 1.0053 |  |  |
| IPI:IPI00327244; | 5.0000  | 7.9000  | 0.0000 | 1.0018 |  |  |
| IPI:IPI00115097; | 2.0000  | 2.3000  | 0.0001 | 1.0015 |  |  |
| IPI:IPI00372009  | 44.0000 | 23.9000 | 0.0000 | 0.9980 |  |  |
| IPI:IPI00875923; | 2.0000  | 6.3000  | 0.0001 | 0.9975 |  |  |
| IPI:IPI00129430; | 14.0000 | 17.9000 | 0.0000 | 0.9959 |  |  |
| IPI:IPI00365423; | 7.0000  | 11.9000 | 0.0000 | 0.9957 |  |  |
| IPI:IPI00389414; | 2.0000  | 7.0000  | 0.0013 | 0.9955 |  |  |
| IPI:IPI00210612  | 2.0000  | 1.4000  | 0.0000 | 0.9945 |  |  |
| IPI:IPI00624192; | 9.0000  | 16.0000 | 0.0000 | 0.9937 |  |  |
| IPI:IPI00231780; | 3.0000  | 18.0000 | 0.0000 | 0.9912 |  |  |
| IPI:IPI00391028; | 2.0000  | 6.4000  | 0.0000 | 0.9831 |  |  |
| IPI:IPI00191216; | 4.0000  | 12.3000 | 0.0000 | 0.9831 |  |  |
| IPI:IPI00363265; | 14.0000 | 26.8000 | 0.0000 | 0.9791 |  |  |
| IPI:IPI00468380; | 10.0000 | 14.8000 | 0.0000 | 0.9758 |  |  |
| IPI:IPI00118899; | 2.0000  | 2.7000  | 0.0001 | 0.9756 |  |  |
| IPI:IPI00331422; | 3.0000  | 4.5000  | 0.0000 | 0.9756 |  |  |
| IPI:IPI00420924; | 9.0000  | 22.4000 | 0.0000 | 0.9744 |  |  |
| IPI:IPI00467338; | 3.0000  | 5.6000  | 0.0000 | 0.9719 |  |  |
| IPI:IPI00396910; | 10.0000 | 20.8000 | 0.0000 | 0.9715 |  |  |
| IPI:IPI00764540; | 14.0000 | 7.9000  | 0.0000 | 0.9690 |  |  |
| IPI:IPI00119305; | 4.0000  | 9.9000  | 0.0001 | 0.9673 |  |  |
| IPI:IPI00208205; | 28.0000 | 40.6000 | 0.0000 | 0.9669 |  |  |
| IPI:IPI00874615; | 2.0000  | 3.7000  | 0.0000 | 0.9651 |  |  |
| IPI:IPI00373107; | 3.0000  | 2.8000  | 0.0000 | 0.9642 |  |  |
| IPI:IPI00265407; | 3.0000  | 6.8000  | 0.0000 | 0.9610 |  |  |
| IPI:IPI00264501; | 3.0000  | 4.1000  | 0.0000 | 0.9585 |  |  |
| IPI:IPI00567481; | 3.0000  | 10.1000 | 0.0000 | 0.9583 |  |  |

|                  |         |         |        |        |  |  |
|------------------|---------|---------|--------|--------|--|--|
| IPI:IPI00755892; | 2.0000  | 5.7000  | 0.0000 | 0.9548 |  |  |
| IPI:IPI00406624; | 2.0000  | 2.2000  | 0.0001 | 0.9521 |  |  |
| IPI:IPI00195929; | 4.0000  | 5.5000  | 0.0000 | 0.9490 |  |  |
| IPI:IPI00679210; | 9.0000  | 33.6000 | 0.0000 | 0.9450 |  |  |
| IPI:IPI00153421; | 2.0000  | 5.5000  | 0.0009 | 0.9436 |  |  |
| IPI:IPI00122521; | 2.0000  | 3.1000  | 0.0009 | 0.9431 |  |  |
| IPI:IPI00130381; | 6.0000  | 5.6000  | 0.0000 | 0.9408 |  |  |
| IPI:IPI00649886; | 4.0000  | 6.8000  | 0.0000 | 0.9392 |  |  |
| IPI:IPI00215470  | 4.0000  | 6.4000  | 0.0000 | 0.9338 |  |  |
| IPI:IPI00387517; | 4.0000  | 5.5000  | 0.0000 | 0.9281 |  |  |
| IPI:IPI00884567; | 7.0000  | 18.5000 | 0.0000 | 0.9279 |  |  |
| IPI:IPI00128973; | 2.0000  | 12.3000 | 0.0000 | 0.9248 |  |  |
| IPI:IPI00911268; | 4.0000  | 3.3000  | 0.0000 | 0.9194 |  |  |
| IPI:IPI00900411; | 2.0000  | 3.1000  | 0.0007 | 0.9182 |  |  |
| IPI:IPI00118196; | 2.0000  | 4.9000  | 0.0000 | 0.9146 |  |  |
| IPI:IPI00330804; | 15.0000 | 21.1000 | 0.0000 | 0.9141 |  |  |
| IPI:IPI00653307; | 8.0000  | 14.3000 | 0.0000 | 0.9139 |  |  |
| IPI:IPI00113149; | 2.0000  | 8.0000  | 0.0006 | 0.9112 |  |  |
| IPI:IPI00111831; | 3.0000  | 1.9000  | 0.0000 | 0.9112 |  |  |
| IPI:IPI00366516; | 3.0000  | 5.5000  | 0.0000 | 0.9063 |  |  |
| IPI:IPI00187443; | 2.0000  | 4.9000  | 0.0000 | 0.9052 |  |  |
| IPI:IPI00200876; | 3.0000  | 2.6000  | 0.0000 | 0.9043 |  |  |
| IPI:IPI00382330; | 2.0000  | 4.1000  | 0.0003 | 0.9039 |  |  |
| IPI:IPI00122451; | 8.0000  | 17.7000 | 0.0000 | 0.9028 |  |  |
| IPI:IPI00123501; | 3.0000  | 4.1000  | 0.0000 | 0.9021 |  |  |
| IPI:IPI00467932; | 2.0000  | 3.2000  | 0.0061 | 0.9005 |  |  |
| IPI:IPI00679178; | 9.0000  | 24.1000 | 0.0000 | 0.9005 |  |  |
| IPI:IPI00407692; | 4.0000  | 8.1000  | 0.0000 | 0.9003 |  |  |
| IPI:IPI00222763; | 3.0000  | 11.2000 | 0.0000 | 0.8976 |  |  |

|                  |         |         |        |        |  |  |
|------------------|---------|---------|--------|--------|--|--|
| IPI:IPI00191728; | 2.0000  | 4.6000  | 0.0016 | 0.8967 |  |  |
| IPI:IPI00649267; | 3.0000  | 3.5000  | 0.0001 | 0.8964 |  |  |
| IPI:IPI00169463; | 13.0000 | 27.6000 | 0.0000 | 0.8951 |  |  |
| IPI:IPI00314153; | 2.0000  | 4.6000  | 0.0000 | 0.8938 |  |  |
| IPI:IPI00115998; | 2.0000  | 6.7000  | 0.0000 | 0.8900 |  |  |
| IPI:IPI00201332; | 3.0000  | 7.7000  | 0.0000 | 0.8885 |  |  |
| IPI:IPI00420464; | 2.0000  | 2.2000  | 0.0000 | 0.8877 |  |  |
| IPI:IPI00196507; | 9.0000  | 13.8000 | 0.0000 | 0.8829 |  |  |
| IPI:IPI00231651; | 2.0000  | 16.7000 | 0.0000 | 0.8820 |  |  |
| IPI:IPI00564111; | 4.0000  | 6.0000  | 0.0000 | 0.8792 |  |  |
| IPI:IPI00390053; | 8.0000  | 22.9000 | 0.0000 | 0.8762 |  |  |
| IPI:IPI00317298; | 5.0000  | 10.6000 | 0.0000 | 0.8749 |  |  |
| IPI:IPI00368350; | 3.0000  | 5.4000  | 0.0000 | 0.8747 |  |  |
| IPI:IPI00471747; | 3.0000  | 9.8000  | 0.0001 | 0.8733 |  |  |
| IPI:IPI00766207; | 6.0000  | 11.4000 | 0.0000 | 0.8716 |  |  |
| IPI:IPI00782724; | 3.0000  | 13.6000 | 0.0000 | 0.8711 |  |  |
| IPI:IPI00560977; | 5.0000  | 8.9000  | 0.0000 | 0.8699 |  |  |
| IPI:IPI00197570; | 2.0000  | 3.8000  | 0.0002 | 0.8684 |  |  |
| IPI:IPI00197553; | 3.0000  | 9.6000  | 0.0000 | 0.8681 |  |  |
| IPI:IPI00224729; | 4.0000  | 10.0000 | 0.0000 | 0.8637 |  |  |
| IPI:IPI00309237; | 2.0000  | 3.8000  | 0.0004 | 0.8633 |  |  |
| IPI:IPI00896654; | 2.0000  | 4.3000  | 0.0000 | 0.8604 |  |  |
| IPI:IPI00112312; | 5.0000  | 11.8000 | 0.0000 | 0.8600 |  |  |
| IPI:IPI00766956; | 12.0000 | 39.2000 | 0.0000 | 0.8558 |  |  |
| IPI:IPI00227392; | 9.0000  | 28.0000 | 0.0000 | 0.8556 |  |  |
| IPI:IPI00231929; | 5.0000  | 9.4000  | 0.0000 | 0.8553 |  |  |
| IPI:IPI00213638; | 4.0000  | 9.7000  | 0.0000 | 0.8513 |  |  |
| IPI:IPI00128818; | 5.0000  | 7.5000  | 0.0000 | 0.8500 |  |  |
| IPI:IPI00230035; | 6.0000  | 9.1000  | 0.0000 | 0.8466 |  |  |



|                  |         |         |        |        |  |  |
|------------------|---------|---------|--------|--------|--|--|
| IPI:IPI00361853; | 3.0000  | 6.1000  | 0.0000 | 0.8443 |  |  |
| IPI:IPI00471584; | 12.0000 | 16.6000 | 0.0000 | 0.8427 |  |  |
| IPI:IPI00400578; | 12.0000 | 18.6000 | 0.0000 | 0.8423 |  |  |
| IPI:IPI00221621; | 2.0000  | 2.7000  | 0.0004 | 0.8418 |  |  |
| IPI:IPI00194562; | 2.0000  | 3.5000  | 0.0000 | 0.8396 |  |  |
| IPI:IPI00373135; | 2.0000  | 7.4000  | 0.0000 | 0.8390 |  |  |
| IPI:IPI00208029; | 9.0000  | 19.4000 | 0.0000 | 0.8389 |  |  |
| IPI:IPI00415403; | 4.0000  | 7.6000  | 0.0000 | 0.8376 |  |  |
| IPI:IPI00368005; | 5.0000  | 9.3000  | 0.0000 | 0.8336 |  |  |
| IPI:IPI00324364; | 4.0000  | 8.0000  | 0.0000 | 0.8312 |  |  |
| IPI:IPI00365783; | 6.0000  | 4.5000  | 0.0000 | 0.8295 |  |  |
| IPI:IPI00204843; | 5.0000  | 14.1000 | 0.0000 | 0.8293 |  |  |
| IPI:IPI00828412; | 4.0000  | 10.8000 | 0.0000 | 0.8283 |  |  |
| IPI:IPI00676419; | 2.0000  | 22.0000 | 0.0000 | 0.8272 |  |  |
| IPI:IPI00231407; | 3.0000  | 5.1000  | 0.0000 | 0.8266 |  |  |
| IPI:IPI00767393; | 2.0000  | 3.1000  | 0.0001 | 0.8244 |  |  |
| IPI:IPI00190392; | 4.0000  | 8.4000  | 0.0000 | 0.8243 |  |  |
| IPI:IPI00366745  | 3.0000  | 6.4000  | 0.0000 | 0.8225 |  |  |
| IPI:IPI00194561; | 4.0000  | 9.6000  | 0.0000 | 0.8218 |  |  |
| IPI:IPI00231765; | 7.0000  | 7.7000  | 0.0000 | 0.8190 |  |  |
| IPI:IPI00194324; | 5.0000  | 20.1000 | 0.0000 | 0.8170 |  |  |
| IPI:IPI00656385; | 8.0000  | 21.9000 | 0.0000 | 0.8168 |  |  |
| IPI:IPI00475639; | 13.0000 | 27.6000 | 0.0000 | 0.8153 |  |  |
| IPI:IPI00876592; | 5.0000  | 6.0000  | 0.0000 | 0.8138 |  |  |
| IPI:IPI00112251; | 14.0000 | 29.3000 | 0.0000 | 0.8100 |  |  |
| IPI:IPI00370456; | 6.0000  | 8.6000  | 0.0000 | 0.8059 |  |  |
| IPI:IPI00780155; | 2.0000  | 4.9000  | 0.0000 | 0.8058 |  |  |
| IPI:IPI00194974; | 6.0000  | 14.0000 | 0.0000 | 0.8047 |  |  |
| IPI:IPI00308885; | 8.0000  | 17.1000 | 0.0000 | 0.8025 |  |  |

|                  |         |         |        |        |  |  |
|------------------|---------|---------|--------|--------|--|--|
| IPI:IPI00263313; | 2.0000  | 6.8000  | 0.0000 | 0.8012 |  |  |
| IPI:IPI00470288; | 3.0000  | 11.5000 | 0.0000 | 0.7993 |  |  |
| IPI:IPI00363236; | 3.0000  | 2.8000  | 0.0000 | 0.7990 |  |  |
| IPI:IPI00360030; | 6.0000  | 8.8000  | 0.0000 | 0.7967 |  |  |
| IPI:IPI00330958; | 3.0000  | 9.6000  | 0.0000 | 0.7965 |  |  |
| IPI:IPI00210119; | 3.0000  | 4.7000  | 0.0000 | 0.7948 |  |  |
| IPI:IPI00211936; | 4.0000  | 7.7000  | 0.0000 | 0.7931 |  |  |
| IPI:IPI00208038; | 2.0000  | 8.2000  | 0.0002 | 0.7897 |  |  |
| IPI:IPI00623776; | 4.0000  | 25.3000 | 0.0000 | 0.7851 |  |  |
| IPI:IPI00210009; | 5.0000  | 15.7000 | 0.0000 | 0.7835 |  |  |
| IPI:IPI00372489; | 5.0000  | 8.5000  | 0.0000 | 0.7805 |  |  |
| IPI:IPI00127172; | 2.0000  | 2.7000  | 0.0000 | 0.7720 |  |  |
| IPI:IPI00779779; | 6.0000  | 6.9000  | 0.0000 | 0.7652 |  |  |
| IPI:IPI00363828; | 3.0000  | 6.9000  | 0.0000 | 0.7648 |  |  |
| IPI:IPI00201089; | 6.0000  | 9.1000  | 0.0000 | 0.7634 |  |  |
| IPI:IPI00212724; | 2.0000  | 8.1000  | 0.0000 | 0.7601 |  |  |
| IPI:IPI00195372; | 7.0000  | 14.3000 | 0.0000 | 0.7577 |  |  |
| IPI:IPI00366038; | 10.0000 | 11.7000 | 0.0000 | 0.7560 |  |  |
| IPI:IPI00119113; | 3.0000  | 7.0000  | 0.0000 | 0.7552 |  |  |
| IPI:IPI00769218; | 6.0000  | 24.0000 | 0.0000 | 0.7544 |  |  |
| IPI:IPI00230440; | 2.0000  | 4.6000  | 0.0000 | 0.7505 |  |  |
| IPI:IPI00555302; | 2.0000  | 5.8000  | 0.0000 | 0.7494 |  |  |
| IPI:IPI00382132; | 2.0000  | 3.7000  | 0.0000 | 0.7479 |  |  |
| IPI:IPI00764167; | 5.0000  | 1.9000  | 0.0000 | 0.7427 |  |  |
| IPI:IPI00474430; | 2.0000  | 9.8000  | 0.0000 | 0.7413 |  |  |
| IPI:IPI00109061; | 13.0000 | 27.6000 | 0.0000 | 0.7395 |  |  |
| IPI:IPI00420949; | 15.0000 | 15.8000 | 0.0000 | 0.7385 |  |  |
| IPI:IPI00366436; | 5.0000  | 9.2000  | 0.0000 | 0.7376 |  |  |
| IPI:IPI00209446; | 3.0000  | 7.8000  | 0.0000 | 0.7318 |  |  |

|                  |         |         |        |        |  |  |
|------------------|---------|---------|--------|--------|--|--|
| IPI:IPI00223217; | 2.0000  | 10.8000 | 0.0001 | 0.7302 |  |  |
| IPI:IPI00764638; | 8.0000  | 10.2000 | 0.0000 | 0.7274 |  |  |
| IPI:IPI00566967; | 8.0000  | 11.2000 | 0.0000 | 0.7249 |  |  |
| IPI:IPI00567915; | 11.0000 | 13.9000 | 0.0000 | 0.7230 |  |  |
| IPI:IPI00231650; | 12.0000 | 35.6000 | 0.0000 | 0.7183 |  |  |
| IPI:IPI00395193; | 2.0000  | 2.9000  | 0.0000 | 0.7096 |  |  |
| IPI:IPI00360386; | 4.0000  | 5.0000  | 0.0000 | 0.7075 |  |  |
| IPI:IPI00388599; | 3.0000  | 16.1000 | 0.0000 | 0.7054 |  |  |
| IPI:IPI00199273; | 4.0000  | 12.8000 | 0.0000 | 0.7034 |  |  |
| IPI:IPI00117229; | 4.0000  | 4.6000  | 0.0000 | 0.7033 |  |  |
| IPI:IPI00200431; | 5.0000  | 7.4000  | 0.0000 | 0.6997 |  |  |
| IPI:IPI00114733; | 3.0000  | 11.3000 | 0.0000 | 0.6986 |  |  |
| IPI:IPI00231827; | 8.0000  | 11.6000 | 0.0000 | 0.6982 |  |  |
| IPI:IPI00605187; | 5.0000  | 5.2000  | 0.0000 | 0.6948 |  |  |
| IPI:IPI00389131; | 3.0000  | 1.9000  | 0.0000 | 0.6942 |  |  |
| IPI:IPI00560565; | 5.0000  | 12.0000 | 0.0000 | 0.6865 |  |  |
| IPI:IPI00361888; | 2.0000  | 30.9000 | 0.0000 | 0.6832 |  |  |
| IPI:IPI00189074; | 24.0000 | 35.7000 | 0.0000 | 0.6753 |  |  |
| IPI:IPI00562876; | 31.0000 | 16.1000 | 0.0000 | 0.6740 |  |  |
| IPI:IPI00896775; | 13.0000 | 24.2000 | 0.0000 | 0.6697 |  |  |
| IPI:IPI00551815; | 8.0000  | 44.2000 | 0.0000 | 0.6692 |  |  |
| IPI:IPI00765153; | 9.0000  | 16.2000 | 0.0000 | 0.6664 |  |  |
| IPI:IPI00889339; | 8.0000  | 21.5000 | 0.0000 | 0.6642 |  |  |
| IPI:IPI00410804; | 2.0000  | 7.3000  | 0.0000 | 0.6619 |  |  |
| IPI:IPI00471901; | 2.0000  | 2.2000  | 0.0000 | 0.6528 |  |  |
| IPI:IPI00200586; | 8.0000  | 15.8000 | 0.0000 | 0.6505 |  |  |
| IPI:IPI00206224; | 5.0000  | 12.4000 | 0.0000 | 0.6495 |  |  |
| IPI:IPI00111265; | 2.0000  | 8.4000  | 0.0000 | 0.6489 |  |  |
| IPI:IPI00200147; | 7.0000  | 18.3000 | 0.0000 | 0.6482 |  |  |

|                  |         |         |        |        |  |  |
|------------------|---------|---------|--------|--------|--|--|
| IPI:IPI00850200; | 32.0000 | 15.5000 | 0.0000 | 0.6481 |  |  |
| IPI:IPI00780092  | 2.0000  | 2.1000  | 0.0000 | 0.6471 |  |  |
| IPI:IPI00121608; | 4.0000  | 6.3000  | 0.0000 | 0.6439 |  |  |
| IPI:IPI00359323; | 23.0000 | 22.7000 | 0.0000 | 0.6393 |  |  |
| IPI:IPI00366761; | 2.0000  | 3.7000  | 0.0000 | 0.6366 |  |  |
| IPI:IPI00130591; | 2.0000  | 3.5000  | 0.0001 | 0.6308 |  |  |
| IPI:IPI00281011; | 2.0000  | 14.0000 | 0.0000 | 0.6263 |  |  |
| IPI:IPI00204261; | 4.0000  | 4.6000  | 0.0000 | 0.6246 |  |  |
| IPI:IPI00230914; | 3.0000  | 12.1000 | 0.0000 | 0.6207 |  |  |
| IPI:IPI00357923; | 8.0000  | 14.6000 | 0.0000 | 0.6197 |  |  |
| IPI:IPI00137787; | 9.0000  | 25.3000 | 0.0000 | 0.6167 |  |  |
| IPI:IPI00764484; | 2.0000  | 2.8000  | 0.0004 | 0.6145 |  |  |
| IPI:IPI00212219; | 9.0000  | 15.2000 | 0.0000 | 0.6142 |  |  |
| IPI:IPI00362818; | 4.0000  | 5.7000  | 0.0000 | 0.6076 |  |  |
| IPI:IPI00199636; | 4.0000  | 7.8000  | 0.0000 | 0.6044 |  |  |
| IPI:IPI00272622; | 2.0000  | 5.7000  | 0.0021 | 0.6044 |  |  |
| IPI:IPI00200047; | 7.0000  | 11.7000 | 0.0000 | 0.6013 |  |  |
| IPI:IPI00231678; | 16.0000 | 18.3000 | 0.0000 | 0.6012 |  |  |
| IPI:IPI00231445; | 5.0000  | 21.6000 | 0.0000 | 0.5928 |  |  |
| IPI:IPI00133428; | 3.0000  | 7.5000  | 0.0000 | 0.5921 |  |  |
| IPI:IPI00313525; | 5.0000  | 8.6000  | 0.0000 | 0.5814 |  |  |
| IPI:IPI00781839; | 7.0000  | 19.4000 | 0.0000 | 0.5812 |  |  |
| IPI:IPI00556847; | 5.0000  | 22.6000 | 0.0000 | 0.5794 |  |  |
| IPI:IPI00480687; | 6.0000  | 32.0000 | 0.0000 | 0.5792 |  |  |
| IPI:IPI00776428; | 11.0000 | 24.7000 | 0.0000 | 0.5785 |  |  |
| IPI:IPI00393034; | 9.0000  | 23.1000 | 0.0000 | 0.5770 |  |  |
| IPI:IPI00326486; | 2.0000  | 4.9000  | 0.0000 | 0.5714 |  |  |
| IPI:IPI00221528; | 5.0000  | 16.2000 | 0.0000 | 0.5703 |  |  |
| IPI:IPI00357978; | 3.0000  | 8.8000  | 0.0000 | 0.5623 |  |  |

|                  |         |         |        |        |  |  |
|------------------|---------|---------|--------|--------|--|--|
| IPI:IPI00222760; | 6.0000  | 12.8000 | 0.0000 | 0.5616 |  |  |
| IPI:IPI00198717; | 2.0000  | 5.7000  | 0.0009 | 0.5526 |  |  |
| IPI:IPI00780361  | 2.0000  | 8.6000  | 0.0000 | 0.5500 |  |  |
| IPI:IPI00755241; | 4.0000  | 4.1000  | 0.0000 | 0.5480 |  |  |
| IPI:IPI00132122; | 5.0000  | 5.1000  | 0.0000 | 0.5478 |  |  |
| IPI:IPI00421832  | 3.0000  | 22.7000 | 0.0000 | 0.5476 |  |  |
| IPI:IPI00768998; | 3.0000  | 3.3000  | 0.0000 | 0.5469 |  |  |
| IPI:IPI00395285; | 12.0000 | 25.1000 | 0.0000 | 0.5468 |  |  |
| IPI:IPI00230917; | 6.0000  | 30.3000 | 0.0000 | 0.5333 |  |  |
| IPI:IPI00855189; | 2.0000  | 18.8000 | 0.0098 | 0.5271 |  |  |
| IPI:IPI00876603; | 20.0000 | 30.9000 | 0.0000 | 0.5169 |  |  |
| IPI:IPI00407835; | 2.0000  | 2.6000  | 0.0000 | 0.5132 |  |  |
| IPI:IPI00202512; | 12.0000 | 20.9000 | 0.0000 | 0.5084 |  |  |
| IPI:IPI00366218; | 4.0000  | 9.2000  | 0.0000 | 0.4964 |  |  |
| IPI:IPI00116277; | 7.0000  | 15.2000 | 0.0000 | 0.4908 |  |  |
| IPI:IPI00780433; | 11.0000 | 17.4000 | 0.0000 | 0.4876 |  |  |
| IPI:IPI00779982; | 3.0000  | 6.3000  | 0.0000 | 0.4844 |  |  |
| IPI:IPI00421357; | 8.0000  | 6.1000  | 0.0000 | 0.4791 |  |  |
| IPI:IPI00470317; | 4.0000  | 10.5000 | 0.0000 | 0.4789 |  |  |
| IPI:IPI00317722; | 2.0000  | 5.1000  | 0.0000 | 0.4752 |  |  |
| IPI:IPI00766481; | 2.0000  | 0.8000  | 0.0006 | 0.4647 |  |  |
| IPI:IPI00360121; | 4.0000  | 8.7000  | 0.0000 | 0.4636 |  |  |
| IPI:IPI00362720; | 3.0000  | 3.9000  | 0.0000 | 0.4588 |  |  |
| IPI:IPI00649950; | 16.0000 | 18.3000 | 0.0000 | 0.4568 |  |  |
| IPI:IPI00366397; | 5.0000  | 6.3000  | 0.0000 | 0.4484 |  |  |
| IPI:IPI00327630; | 20.0000 | 5.1000  | 0.0000 | 0.4359 |  |  |
| IPI:IPI00207657; | 4.0000  | 6.2000  | 0.0000 | 0.4133 |  |  |
| IPI:IPI00765134; | 4.0000  | 7.7000  | 0.0000 | 0.3582 |  |  |
| IPI:IPI00763802; | 6.0000  | 5.5000  | 0.0000 | 0.3493 |  |  |

|                  |         |         |        |        |  |  |
|------------------|---------|---------|--------|--------|--|--|
| IPI:IPI00470301; | 6.0000  | 9.6000  | 0.0000 | 0.3474 |  |  |
| IPI:IPI00198467; | 2.0000  | 3.8000  | 0.0001 | 0.3341 |  |  |
| IPI:IPI00462453; | 6.0000  | 18.1000 | 0.0000 | 0.3182 |  |  |
| IPI:IPI00211225; | 3.0000  | 8.8000  | 0.0000 | 0.2916 |  |  |
| IPI:IPI00752412; | 9.0000  | 12.2000 | 0.0000 | 0.2914 |  |  |
| IPI:IPI00344088; | 5.0000  | 4.9000  | 0.0000 | 0.2574 |  |  |
| IPI:IPI00139259; | 2.0000  | 7.3000  | 0.0002 | 0.2505 |  |  |
| IPI:IPI00777193; | 4.0000  | 7.5000  | 0.0000 | 0.2256 |  |  |
| IPI:IPI00231693; | 5.0000  | 16.7000 | 0.0000 | 0.2077 |  |  |
| IPI:IPI00188924; | 6.0000  | 16.2000 | 0.0000 | 0.1990 |  |  |
| IPI:IPI00567268; | 4.0000  | 6.8000  | 0.0000 | 0.1973 |  |  |
| IPI:IPI00759878; | 12.0000 | 8.2000  | 0.0000 | 0.1972 |  |  |
| IPI:IPI00420972; | 6.0000  | 18.8000 | 0.0000 | 0.1936 |  |  |
| IPI:IPI00780271; | 2.0000  | 4.5000  | 0.0000 | 0.1920 |  |  |
| IPI:IPI00765252; | 3.0000  | 2.2000  | 0.0000 | 0.1857 |  |  |
| IPI:IPI00197696; | 6.0000  | 27.2000 | 0.0000 | 0.1737 |  |  |
| IPI:IPI00624663; | 7.0000  | 4.5000  | 0.0000 | 0.1684 |  |  |
| IPI:IPI00372557; | 4.0000  | 4.6000  | 0.0000 | 0.1647 |  |  |
| IPI:IPI00210920; | 5.0000  | 16.3000 | 0.0000 | 0.1539 |  |  |
| IPI:IPI00370658; | 8.0000  | 8.9000  | 0.0000 | 0.1472 |  |  |
| IPI:IPI00371236; | 4.0000  | 9.3000  | 0.0000 | 0.1389 |  |  |
| IPI:IPI00138274; | 3.0000  | 21.1000 | 0.0000 | 0.1334 |  |  |
| IPI:IPI00366430; | 3.0000  | 3.8000  | 0.0001 | 0.1312 |  |  |
| IPI:IPI00191512; | 3.0000  | 7.7000  | 0.0000 | 0.1293 |  |  |
| IPI:IPI00193500; | 8.0000  | 23.1000 | 0.0000 | 0.1231 |  |  |
| IPI:IPI00231901; | 2.0000  | 6.6000  | 0.0000 | 0.1010 |  |  |
| IPI:IPI00870786; | 2.0000  | 3.6000  | 0.0000 | 0.0996 |  |  |
| IPI:IPI00857253; | 4.0000  | 2.0000  | 0.0000 | 0.0985 |  |  |
| IPI:IPI00116281; | 5.0000  | 9.0000  | 0.0000 | 0.0966 |  |  |

|                  |         |         |        |        |  |  |
|------------------|---------|---------|--------|--------|--|--|
| IPI:IPI00368776; | 5.0000  | 3.3000  | 0.0000 | 0.0656 |  |  |
| IPI:IPI00362105; | 3.0000  | 8.4000  | 0.0000 | 0.0604 |  |  |
| IPI:IPI00765366; | 11.0000 | 25.9000 | 0.0000 | 0.0509 |  |  |
| IPI:IPI00652813; | 16.0000 | 9.4000  | 0.0000 | 0.0400 |  |  |
| IPI:IPI00364286; | 8.0000  | 16.9000 | 0.0000 | 0.0336 |  |  |
| IPI:IPI00364914; | 13.0000 | 7.0000  | 0.0000 | 0.0293 |  |  |
| IPI:IPI00869528; | 6.0000  | 10.2000 | 0.0000 | 0.0283 |  |  |
| IPI:IPI00115564; | 3.0000  | 10.7000 | 0.0000 | 0.0201 |  |  |
| IPI:IPI00662471; | 2.0000  | 11.7000 | 0.0000 | 0.0194 |  |  |
| IPI:IPI00229475; | 7.0000  | 11.1000 | 0.0000 | 0.0193 |  |  |
| IPI:IPI00777695; | 7.0000  | 12.1000 | 0.0000 | 0.0135 |  |  |
| IPI:IPI00816914; | 7.0000  | 4.3000  | 0.0000 | 0.0111 |  |  |
| IPI:IPI00652934; | 8.0000  | 27.2000 | 0.0000 | 0.0094 |  |  |
