# Supplementary material
Source: PubMed Central journal article supplement (PMC4063438)
Supplement: NIHMS589790-supplement-Supplementary_Table_2.pdf [file NIHMS589790-supplement-Supplementary_Table_2.pdf]

**Supplementary Table 2: Rat proteins identified by mass spectrometry after 48 hours of haloperidol or vehicle treatment**

*Forward Experiment 1*

| Protein IDs | Uniprot    | Sequence C | Peptides | PEP (proba | Ratio H/M Normalized (Hal/Veh) |
|-------------|------------|------------|----------|------------|--------------------------------|
| IPI0095058  | Q9EQG6-1   | 1.5000     | 2.0000   | 0.0000     | 1.2372                         |
| IPI0077655  | P11442     | 8.3000     | 16.0000  | 0.0000     | 1.1085                         |
| IPI0032416  | P18266     | 7.6000     | 2.0000   | 0.0000     | 0.9974                         |
| IPI0023105  | P15146-2;F | 26.1000    | 47.0000  | 0.0000     | 1.2867                         |
| IPI0019248  | P62755     | 8.0000     | 2.0000   | 0.0000     | 1.1710                         |
| IPI0036384  | Q4KLF8     | 17.9000    | 3.0000   | 0.0000     | 1.1748                         |
| IPI0055525  | P43244;B5  | 12.2000    | 11.0000  | 0.0000     | 1.0120                         |
| IPI00388687 |            | 8.7000     | 2.0000   | 0.0000     | 0.9460                         |
| IPI0019410  | P21263-1;F | 1.0000     | 2.0000   | 0.0000     | 0.5286                         |
| IPI0020272  | P05765     | 28.9000    | 2.0000   | 0.0000     | 1.0591                         |
| IPI0077788  | Q9WTV5     | 14.5000    | 4.0000   | 0.0000     | 1.0610                         |
| IPI0023091  | P09895     | 14.8000    | 4.0000   | 0.0000     | 1.0615                         |
| IPI0021173  | Q64350     | 5.4000     | 4.0000   | 0.0000     | 1.0635                         |
| IPI0036637  | B2GUV7;Q   | 2.5000     | 3.0000   | 0.0000     | 1.0636                         |
| IPI0076601  | B0BNA7     | 16.3000    | 5.0000   | 0.0000     | 1.0651                         |
| IPI0036598  | Q66HD0-1;K | 15.9000    | 15.0000  | 0.0000     | 1.0663                         |
| IPI0037105  | Q5RK30     | 7.2000     | 2.0000   | 0.0000     | 1.0667                         |
| IPI0065638  | Q3B8Q2     | 10.9000    | 4.0000   | 0.0000     | 1.0672                         |
| IPI0018805  | P62271     | 41.4000    | 8.0000   | 0.0000     | 1.0689                         |
| IPI0037218  | B4F772     | 9.1000     | 7.0000   | 0.0000     | 1.0729                         |
| IPI0037045  | Q4FZT9     | 15.1000    | 15.0000  | 0.0000     | 1.0761                         |
| IPI0018811  | Q3MHS9;Q   | 14.7000    | 9.0000   | 0.0000     | 1.0779                         |
| IPI0036323  | Q5PPJ6     | 6.3000     | 8.0000   | 0.0000     | 1.0792                         |
| IPI0021113  | Q63692     | 7.7000     | 3.0000   | 0.0000     | 1.0802                         |
| IPI0023083  | P68101     | 15.9000    | 6.0000   | 0.0000     | 1.0849                         |
| IPI0019225  | P62718     | 14.8000    | 3.0000   | 0.0000     | 1.0867                         |
| IPI0021510  | P38983     | 15.6000    | 4.0000   | 0.0000     | 1.0873                         |
| IPI0065531  | P35427;Q5  | 27.6000    | 6.0000   | 0.0000     | 1.0887                         |
| IPI0055156  | P47198;Q6  | 18.8000    | 2.0000   | 0.0000     | 1.0888                         |
| IPI0018906  | Q9EPH2     | 35.7000    | 4.0000   | 0.0000     | 1.0900                         |
| IPI0036418  | A0JPM9     | 11.6000    | 3.0000   | 0.0000     | 1.0923                         |
| IPI0047689  | B5DEN5     | 13.8000    | 2.0000   | 0.0000     | 1.0938                         |
| IPI0033916  | P42346     | 3.3000     | 8.0000   | 0.0000     | 1.0947                         |
| IPI0035851  | B5DF60;Q6  | 18.8000    | 3.0000   | 0.0000     | 1.0959                         |
| IPI0023147  | P62246     | 25.4000    | 4.0000   | 0.0000     | 1.0959                         |
| IPI0021284  | P47196     | 7.9000     | 4.0000   | 0.0000     | 1.0989                         |
| IPI0086976  | B5DF91     | 6.1000     | 2.0000   | 0.0000     | 1.0989                         |
| IPI0020851  | O88339     | 3.0000     | 2.0000   | 0.0005     | 1.0990                         |
| IPI0038770  | P39032     | 24.5000    | 3.0000   | 0.0000     | 1.0992                         |

ARMS  
Clathrin  
GSK3B  
MAP2  
RpS6

*Reverse Experiments 2 and 3 (Heavy=Vehicle, Medium= Haloperidol)*

| Protein IDs | Majority prof | Peptides | Sequence c | PEP    | Ratio H/M norr | Ratio H/M n | Ratio H/M c |
|-------------|---------------|----------|------------|--------|----------------|-------------|-------------|
| IPI0095058  | IPI0095058    | 3.0000   | 2.4000     | 0.0000 | not detected   | 0.9872      | 6.0000      |
| IPI0077655  | IPI0077655    | 106.0000 | 65.6000    | 0.0000 | 0.9799         | 1.0095      | 422.0000    |
| IPI0032416  | IPI0032416    | 9.0000   | 32.6000    | 0.0000 | 0.8715         | 0.8667      | 10.0000     |
| IPI0023105  | IPI0023105    | 62.0000  | 38.6000    | 0.0000 | 0.9558         | 0.9687      | 179.0000    |
| IPI0020321  | IPI0020321    | 68.0000  | 78.8000    | 0.0000 | 1.0428         | 1.0295      | 323.0000    |
| IPI0019248  | IPI0019248    | 20.0000  | 57.8000    | 0.0000 | 0.9688         | 1.0358      | 76.0000     |
| IPI0102786  | IPI0102786    | 16.0000  | 78.2000    | 0.0000 | 0.9766         | 1.0388      | 41.0000     |
| IPI0101644  | IPI0101644    | 19.0000  | 22.1000    | 0.0000 | 0.8832         | 0.8517      | 26.0000     |
| IPI0101643  | IPI0101643    | 4.0000   | 10.4000    | 0.0000 | 0.9691         | 1.9105      | 4.0000      |
| IPI0101642  | IPI0101642    | 9.0000   | 55.0000    | 0.0000 | 1.0102         | 0.9579      | 25.0000     |
| IPI0101639  | IPI0101639    | 5.0000   | 6.8000     | 0.0000 | 1.2769         | NaN         | 1.0000      |
| IPI0100761  | IPI0100761    | 56.0000  | 32.1000    | 0.0000 | 0.9129         | 0.7097      | 3.0000      |
| IPI0100758  | IPI0100758    | 36.0000  | 66.1000    | 0.0000 | 1.0250         | 1.0235      | 152.0000    |
| IPI0099128  | IPI0099128    | 4.0000   | 28.8000    | 0.0000 | 1.0376         | 1.2815      | 2.0000      |
| IPI0099125  | IPI0099125    | 10.0000  | 3.3000     | 0.0000 | 0.9924         | 1.0102      | 11.0000     |
| IPI0099124  | IPI0099124    | 1.0000   | 1.1000     | 0.0001 | 0.9745         | 0.9549      | 3.0000      |
| IPI0099115  | IPI0099115    | 13.0000  | 28.0000    | 0.0000 | 0.5894         | NaN         | 1.0000      |
| IPI0096886  | IPI0096886    | 14.0000  | 29.4000    | 0.0000 | 0.9329         | 0.9350      | 33.0000     |
| IPI0096849  | IPI0096849    | 6.0000   | 6.4000     | 0.0000 | 0.9515         | 0.9366      | 5.0000      |
| IPI0096007  | IPI0096007    | 5.0000   | 10.6000    | 0.0000 | 0.9681         | 0.9722      | 5.0000      |
| IPI0096004  | IPI0096004    | 30.0000  | 31.3000    | 0.0000 | 0.8667         | 0.9174      | 40.0000     |
| IPI0096001  | IPI0096001    | 10.0000  | 60.9000    | 0.0000 | 1.1021         | 1.0702      | 42.0000     |
| IPI0095998  | IPI0095998    | 11.0000  | 66.1000    | 0.0000 | 0.9946         | 1.0090      | 32.0000     |
| IPI0095997  | IPI0095997    | 6.0000   | 9.2000     | 0.0000 | 1.0876         | 0.9942      | 7.0000      |
| IPI0095996  | IPI0095996    | 4.0000   | 19.4000    | 0.0000 | 0.8839         | 0.9396      | 6.0000      |
| IPI0095983  | IPI0095983    | 4.0000   | 2.1000     | 0.0000 | 1.1523         | NaN         | 0.0000      |
| IPI0095982  | IPI0095982    | 5.0000   | 15.7000    | 0.0000 | 0.8531         | 0.9853      | 5.0000      |
| IPI0095981  | IPI0095981    | 3.0000   | 1.8000     | 0.0000 | 0.8553         | 0.9984      | 5.0000      |
| IPI0095980  | IPI0095980    | 3.0000   | 14.5000    | 0.0000 | 1.1133         | 1.1212      | 2.0000      |
| IPI0095969  | IPI0095969    | 10.0000  | 41.3000    | 0.0000 | 0.9869         | 0.8859      | 11.0000     |
| IPI0095967  | IPI0095967    | 5.0000   | 4.4000     | 0.0000 | 1.0030         | 1.0849      | 4.0000      |
| IPI0095960  | IPI0095960    | 20.0000  | 17.4000    | 0.0000 | 1.0507         | 0.9992      | 23.0000     |
| IPI0095954  | IPI0095954    | 5.0000   | 4.8000     | 0.0000 | 1.2749         | 1.2338      | 2.0000      |
| IPI0095953  | IPI0095953    | 6.0000   | 9.9000     | 0.0000 | 0.8174         | 0.8439      | 8.0000      |
| IPI0095949  | IPI0095949    | 2.0000   | 7.0000     | 0.0000 | 1.4395         | 1.3754      | 6.0000      |
| IPI0095945  | IPI0095945    | 18.0000  | 15.2000    | 0.0000 | 1.0995         | 1.0451      | 30.0000     |
| IPI0095934  | IPI0095934    | 6.0000   | 22.6000    | 0.0000 | 1.1816         | 0.8626      | 8.0000      |
| IPI0095932  | IPI0095932    | 5.0000   | 0.1000     | 0.0000 | 0.9427         | 0.8391      | 4.0000      |
| IPI0095931  | IPI0095931    | 11.0000  | 13.7000    | 0.0000 | 0.9591         | 0.9126      | 15.0000     |

|             |            |         |         |        |        |
|-------------|------------|---------|---------|--------|--------|
| IPI0020265  | P29266     | 11.0000 | 3.0000  | 0.0000 | 1.0997 |
| IPI0036884  | A1A5S1     | 8.8000  | 8.0000  | 0.0000 | 1.0998 |
| IPI0018907  | Q9EPH8     | 16.8000 | 12.0000 | 0.0000 | 1.0999 |
| IPI0020730  | P08082-1;F | 22.3000 | 6.0000  | 0.0000 | 1.1004 |
| IPI0035910  | P62914;Q4  | 20.2000 | 4.0000  | 0.0000 | 1.1007 |
| IPI0076669  | Q5U4E6     | 3.2000  | 8.0000  | 0.0000 | 1.1013 |
| IPI00373628 |            | 8.5000  | 2.0000  | 0.0000 | 1.1016 |
| IPI0023169  | P49242     | 31.1000 | 9.0000  | 0.0000 | 1.1018 |
| IPI0036497  | Q3KRD8     | 7.8000  | 2.0000  | 0.0002 | 1.1020 |
| IPI0032656  | Q8VHK2     | 6.1000  | 7.0000  | 0.0000 | 1.1026 |
| IPI00370450 | IPI0039303 | 2.9000  | 5.0000  | 0.0000 | 1.1028 |
| IPI0036272  | Q66H61     | 8.3000  | 6.0000  | 0.0000 | 1.1029 |
| IPI0020982  | Q9Z2F1;P0  | 9.1000  | 5.0000  | 0.0000 | 1.1030 |
| IPI00358015 |            | 18.2000 | 2.0000  | 0.0000 | 1.1031 |
| IPI0042145  | P62250;B0  | 25.5000 | 6.0000  | 0.0000 | 1.1031 |
| IPI0032461  | P41542     | 9.6000  | 8.0000  | 0.0000 | 1.1032 |
| IPI00370815 |            | 29.0000 | 16.0000 | 0.0000 | 1.1034 |
| IPI0020998  | Q03346     | 7.8000  | 4.0000  | 0.0000 | 1.1035 |
| IPI0020541  | P97526     | 4.2000  | 12.0000 | 0.0000 | 1.1044 |
| IPI0039156  | Q78P65;P6  | 10.9000 | 2.0000  | 0.0001 | 1.1047 |
| IPI0019537  | P62630     | 18.4000 | 10.0000 | 0.0000 | 1.1048 |
| IPI0023079  | Q03555-3;C | 10.1000 | 7.0000  | 0.0000 | 1.1049 |
| IPI0032526  | Q70593     | 9.2000  | 3.0000  | 0.0000 | 1.1049 |
| IPI0019020  | Q4V884     | 2.6000  | 2.0000  | 0.0011 | 1.1053 |
| IPI0020473  | Q9JM11     | 7.9000  | 6.0000  | 0.0000 | 1.1054 |
| IPI0020237  | Q68FT7     | 8.1000  | 5.0000  | 0.0000 | 1.1059 |
| IPI0039691  | P15999     | 12.1000 | 7.0000  | 0.0000 | 1.1060 |
| IPI0047031  | Q68FR6     | 16.5000 | 9.0000  | 0.0000 | 1.1060 |
| IPI0019201  | Q9JK25     | 7.7000  | 10.0000 | 0.0000 | 1.1061 |
| IPI0020955  | Q5EGY4     | 8.1000  | 2.0000  | 0.0000 | 1.1061 |
| IPI0021430  | Q79210;Q9Z | 14.7000 | 3.0000  | 0.0000 | 1.1062 |
| IPI0020335  | Q9WTT7     | 10.0000 | 5.0000  | 0.0000 | 1.1064 |
| IPI0036007  | Q5SGE0     | 11.1000 | 17.0000 | 0.0000 | 1.1067 |
| IPI0094422  | Q35952-1;C | 8.7000  | 2.0000  | 0.0000 | 1.1072 |
| IPI0020196  | Q3MIE4     | 14.6000 | 4.0000  | 0.0000 | 1.1078 |
| IPI0023188  | P08592-2;F | 10.2000 | 7.0000  | 0.0000 | 1.1079 |
| IPI0033176  | Q810U0     | 7.5000  | 2.0000  | 0.0000 | 1.1079 |
| IPI0021102  | Q63633-1;C | 2.7000  | 3.0000  | 0.0000 | 1.1081 |
| IPI0021038  | Q62991     | 7.1000  | 3.0000  | 0.0000 | 1.1083 |
| IPI0047158  | P34058     | 23.1000 | 18.0000 | 0.0000 | 1.1086 |
| IPI0078067  | Q9WV25-1;  | 5.3000  | 3.0000  | 0.0000 | 1.1087 |
| IPI0094966  | Q9WUW2;F   | 14.9000 | 2.0000  | 0.0000 | 1.1089 |

|            |            |         |         |        |        |        |          |
|------------|------------|---------|---------|--------|--------|--------|----------|
| IPI0095925 | IPI0095925 | 14.0000 | 34.5000 | 0.0000 | 0.9631 | 0.8813 | 25.0000  |
| IPI0095910 | IPI0095910 | 4.0000  | 41.2000 | 0.0000 | 0.9082 | 1.0232 | 7.0000   |
| IPI0095900 | IPI0095900 | 7.0000  | 19.4000 | 0.0000 | 1.1215 | 0.8787 | 5.0000   |
| IPI0095895 | IPI0095895 | 3.0000  | 7.6000  | 0.0000 | 1.3206 | 1.2912 | 3.0000   |
| IPI0095885 | IPI0095885 | 26.0000 | 33.4000 | 0.0000 | 0.9476 | 0.9666 | 25.0000  |
| IPI0095884 | IPI0095884 | 3.0000  | 6.3000  | 0.0000 | 0.9683 | 0.7177 | 2.0000   |
| IPI0095871 | IPI0095871 | 3.0000  | 14.0000 | 0.0001 | 0.4678 | 1.5051 | 3.0000   |
| IPI0095870 | IPI0095870 | 5.0000  | 2.9000  | 0.0000 | 1.5262 | 1.2806 | 5.0000   |
| IPI0095863 | IPI0095863 | 6.0000  | 32.4000 | 0.0000 | 1.8660 | 0.6574 | 3.0000   |
| IPI0095843 | IPI0095843 | 2.0000  | 0.9000  | 0.0000 | 1.0924 | NaN    | 0.0000   |
| IPI0095843 | IPI0095843 | 2.0000  | 2.6000  | 0.0000 | 0.8842 | 0.9702 | 2.0000   |
| IPI0095840 | IPI0095840 | 20.0000 | 79.7000 | 0.0000 | 0.9512 | 1.0077 | 74.0000  |
| IPI0095838 | IPI0095838 | 16.0000 | 35.2000 | 0.0000 | 1.0031 | 0.9863 | 33.0000  |
| IPI0095830 | IPI0095830 | 7.0000  | 19.7000 | 0.0000 | 1.1584 | 0.9880 | 9.0000   |
| IPI0095828 | IPI0095828 | 5.0000  | 8.3000  | 0.0000 | 1.0904 | 1.0627 | 15.0000  |
| IPI0095828 | IPI0095828 | 6.0000  | 48.5000 | 0.0000 | 0.9585 | 0.9740 | 11.0000  |
| IPI0095822 | IPI0095822 | 8.0000  | 30.9000 | 0.0000 | 0.9766 | 0.9221 | 7.0000   |
| IPI0095819 | IPI0095819 | 2.0000  | 14.0000 | 0.0000 | 1.0729 | 1.0091 | 6.0000   |
| IPI0095817 | IPI0095817 | 12.0000 | 17.6000 | 0.0000 | 0.9900 | 0.9859 | 12.0000  |
| IPI0095814 | IPI0095814 | 3.0000  | 11.5000 | 0.0000 | 0.8508 | 1.0169 | 6.0000   |
| IPI0095809 | IPI0095809 | 35.0000 | 68.5000 | 0.0000 | 1.1397 | 1.1209 | 162.0000 |
| IPI0095806 | IPI0095806 | 11.0000 | 9.9000  | 0.0000 | 0.9292 | 0.9748 | 14.0000  |
| IPI0095792 | IPI0095792 | 17.0000 | 21.0000 | 0.0000 | 0.9374 | 0.9619 | 34.0000  |
| IPI0095790 | IPI0095790 | 33.0000 | 57.0000 | 0.0000 | 0.9819 | 0.9954 | 84.0000  |
| IPI0095783 | IPI0095783 | 36.0000 | 33.9000 | 0.0000 | 1.0484 | 0.9712 | 7.0000   |
| IPI0095779 | IPI0095779 | 37.0000 | 71.9000 | 0.0000 | 0.9782 | 0.9815 | 113.0000 |
| IPI0095777 | IPI0095777 | 3.0000  | 15.2000 | 0.0000 | 3.4402 | 0.8711 | 6.0000   |
| IPI0095772 | IPI0095772 | 5.0000  | 31.8000 | 0.0000 | 1.0231 | 0.9989 | 17.0000  |
| IPI0095772 | IPI0095772 | 3.0000  | 26.8000 | 0.0000 | 1.0293 | 0.9965 | 15.0000  |
| IPI0095744 | IPI0095744 | 2.0000  | 3.3000  | 0.0000 | 0.8414 | NaN    | 1.0000   |
| IPI0095733 | IPI0095733 | 2.0000  | 27.5000 | 0.0003 | NaN    | NaN    | 1.0000   |
| IPI0095721 | IPI0095721 | 4.0000  | 11.3000 | 0.0000 | 1.0151 | NaN    | 1.0000   |
| IPI0095717 | IPI0095717 | 22.0000 | 30.0000 | 0.0000 | 1.1006 | 1.0585 | 58.0000  |
| IPI0095716 | IPI0095716 | 3.0000  | 2.2000  | 0.0001 | NaN    | 0.9755 | 2.0000   |
| IPI0095714 | IPI0095714 | 1.0000  | 14.5000 | 0.0000 | 1.0973 | 1.0243 | 4.0000   |
| IPI0095563 | IPI0095563 | 15.0000 | 46.1000 | 0.0000 | 1.0513 | 0.9764 | 28.0000  |
| IPI0095562 | IPI0095562 | 18.0000 | 65.5000 | 0.0000 | 1.0857 | 1.0349 | 53.0000  |
| IPI0095561 | IPI0095561 | 5.0000  | 81.6000 | 0.0000 | 1.0549 | 0.9891 | 16.0000  |
| IPI0095517 | IPI0095517 | 4.0000  | 41.0000 | 0.0000 | 0.8947 | 1.0061 | 7.0000   |
| IPI0095469 | IPI0095469 | 11.0000 | 66.9000 | 0.0000 | 0.6410 | 0.9458 | 16.0000  |
| IPI0095248 | IPI0095248 | 4.0000  | 7.3000  | 0.0000 | 1.2141 | NaN    | 1.0000   |
| IPI0095246 | IPI0095246 | 6.0000  | 5.6000  | 0.0000 | 0.9871 | 1.0606 | 3.0000   |

|            |            |         |         |        |        |
|------------|------------|---------|---------|--------|--------|
| IPI0032448 | P20595;Q8  | 5.8000  | 4.0000  | 0.0000 | 1.1089 |
| IPI0086952 | B1WBX8     | 13.5000 | 11.0000 | 0.0000 | 1.1090 |
| IPI0020602 | Q5RJR8     | 6.5000  | 2.0000  | 0.0045 | 1.1091 |
| IPI0035927 | Q5M7A7     | 18.9000 | 3.0000  | 0.0000 | 1.1095 |
| IPI0036216 | Q4QRB4     | 13.8000 | 6.0000  | 0.0000 | 1.1095 |
| IPI0021334 | O35889-1;C | 6.9000  | 13.0000 | 0.0000 | 1.1099 |
| IPI0020863 | Q9Z1B2;P0  | 8.0000  | 2.0000  | 0.0000 | 1.1103 |
| IPI0020997 | Q03344     | 9.3000  | 2.0000  | 0.0011 | 1.1104 |
| IPI0020820 | P63018     | 24.5000 | 18.0000 | 0.0000 | 1.1105 |
| IPI0038223 | Q7TP61;Q5  | 5.1000  | 3.0000  | 0.0002 | 1.1105 |
| IPI0021278 | P17078     | 13.8000 | 2.0000  | 0.0000 | 1.1107 |
| IPI0047183 | Q66HA8     | 7.5000  | 6.0000  | 0.0000 | 1.1114 |
| IPI0021524 | P48004-1;F | 20.1000 | 5.0000  | 0.0000 | 1.1128 |
| IPI0036643 | Q498D2     | 8.0000  | 5.0000  | 0.0000 | 1.1135 |
| IPI0019823 | Q5XHY5     | 11.5000 | 9.0000  | 0.0000 | 1.1142 |
| IPI0037200 | P15205;B0  | 22.0000 | 49.0000 | 0.0000 | 1.1149 |
| IPI0021102 | Q63635     | 9.8000  | 2.0000  | 0.0000 | 1.1152 |
| IPI0076416 | B2RYD3;Q6  | 2.1000  | 4.0000  | 0.0000 | 1.1152 |
| IPI0042160 | Q63347     | 10.2000 | 4.0000  | 0.0000 | 1.1160 |
| IPI0021358 | P62198;O3  | 16.7000 | 6.0000  | 0.0000 | 1.1170 |
| IPI0021452 | Q9QZ81     | 8.3000  | 7.0000  | 0.0000 | 1.1174 |
| IPI0020150 | P13471;Q6  | 27.8000 | 3.0000  | 0.0000 | 1.1179 |
| IPI0088933 | B0K023;B0  | 25.4000 | 10.0000 | 0.0000 | 1.1203 |
| IPI0019037 | Q5U2R7     | 11.6000 | 3.0000  | 0.0000 | 1.1205 |
| IPI0038975 | Q8VHU4     | 5.4000  | 7.0000  | 0.0000 | 1.1205 |
| IPI0020089 | Q9JIR4-1;Q | 2.8000  | 4.0000  | 0.0000 | 1.1211 |
| IPI0020251 | P50878;Q6  | 10.7000 | 6.0000  | 0.0000 | 1.1214 |
| IPI0032801 | Q64715     | 26.4000 | 47.0000 | 0.0000 | 1.1222 |
| IPI0019359 | Q5RKI1     | 11.3000 | 5.0000  | 0.0000 | 1.1239 |
| IPI0020352 | P62752;B5  | 26.9000 | 4.0000  | 0.0000 | 1.1251 |
| IPI0037255 | Q04462;Q4  | 7.7000  | 9.0000  | 0.0000 | 1.1254 |
| IPI0047617 | P18422;Q6  | 12.2000 | 3.0000  | 0.0000 | 1.1269 |
| IPI0019670 | P28023     | 10.6000 | 13.0000 | 0.0000 | 1.1276 |
| IPI0020055 | P12749     | 29.0000 | 7.0000  | 0.0000 | 1.1318 |
| IPI0091418 | B5DFC8     | 6.8000  | 7.0000  | 0.0000 | 1.1318 |
| IPI0076426 | P62853     | 26.0000 | 4.0000  | 0.0000 | 1.1340 |
| IPI0036678 | Q4KM49     | 23.0000 | 13.0000 | 0.0000 | 1.1344 |
| IPI0039258 | P62628     | 9.4000  | 2.0000  | 0.0007 | 1.1344 |
| IPI0056036 | Q5XIM7     | 14.2000 | 10.0000 | 0.0000 | 1.1350 |
| IPI0037316 | Q6P685     | 5.1000  | 2.0000  | 0.0000 | 1.1356 |
| IPI0032643 | P26772;P9  | 48.0000 | 5.0000  | 0.0000 | 1.1363 |
| IPI0046466 | Q6AYB4     | 5.9000  | 3.0000  | 0.0000 | 1.1363 |

|            |            |         |         |        |        |        |          |
|------------|------------|---------|---------|--------|--------|--------|----------|
| IPI0095246 | IPI0095246 | 2.0000  | 3.2000  | 0.0000 | 0.9546 | NaN    | 1.0000   |
| IPI0095243 | IPI0095243 | 20.0000 | 50.7000 | 0.0000 | 1.0641 | 0.9904 | 32.0000  |
| IPI0095235 | IPI0095235 | 9.0000  | 13.8000 | 0.0000 | 0.9127 | 0.8772 | 13.0000  |
| IPI0095232 | IPI0095232 | 4.0000  | 14.9000 | 0.0000 | NaN    | 5.1994 | 2.0000   |
| IPI0095231 | IPI0095231 | 2.0000  | 5.7000  | 0.0000 | NaN    | NaN    | 1.0000   |
| IPI0095228 | IPI0095228 | 33.0000 | 67.0000 | 0.0000 | 1.0494 | 1.0366 | 107.0000 |
| IPI0095226 | IPI0095226 | 1.0000  | 3.0000  | 0.0000 | NaN    | NaN    | 0.0000   |
| IPI0095223 | IPI0095223 | 17.0000 | 61.1000 | 0.0000 | 0.9717 | 0.9148 | 51.0000  |
| IPI0095205 | IPI0095205 | 7.0000  | 14.7000 | 0.0000 | 1.2247 | 0.9983 | 14.0000  |
| IPI0095201 | IPI0095201 | 3.0000  | 23.1000 | 0.0000 | 0.9914 | 1.1026 | 4.0000   |
| IPI0095200 | IPI0095200 | 41.0000 | 53.1000 | 0.0000 | 1.0378 | 1.0082 | 3.0000   |
| IPI0095199 | IPI0095199 | 40.0000 | 85.2000 | 0.0000 | 1.0125 | 1.0141 | 220.0000 |
| IPI0095196 | IPI0095196 | 1.0000  | 18.9000 | 0.0000 | 0.9693 | 1.0010 | 3.0000   |
| IPI0095196 | IPI0095196 | 27.0000 | 72.1000 | 0.0000 | 0.9973 | 0.9987 | 130.0000 |
| IPI0095195 | IPI0095195 | 5.0000  | 9.4000  | 0.0000 | 0.7055 | 0.9325 | 4.0000   |
| IPI0095193 | IPI0095193 | 13.0000 | 36.9000 | 0.0000 | 1.0272 | 1.0515 | 32.0000  |
| IPI0095191 | IPI0095191 | 4.0000  | 49.0000 | 0.0000 | 7.0920 | 1.6290 | 5.0000   |
| IPI0095189 | IPI0095189 | 35.0000 | 48.3000 | 0.0000 | 1.7159 | NaN    | 0.0000   |
| IPI0095188 | IPI0095188 | 7.0000  | 5.6000  | 0.0000 | 1.0539 | 1.3990 | 9.0000   |
| IPI0095188 | IPI0095188 | 1.0000  | 5.9000  | 0.0007 | NaN    | NaN    | 0.0000   |
| IPI0095183 | IPI0095183 | 4.0000  | 12.3000 | 0.0000 | 0.8122 | 0.8795 | 5.0000   |
| IPI0095173 | IPI0095173 | 15.0000 | 74.4000 | 0.0000 | 0.9708 | 0.9403 | 32.0000  |
| IPI0095172 | IPI0095172 | 2.0000  | 3.2000  | 0.0000 | 0.9344 | NaN    | 1.0000   |
| IPI0095171 | IPI0095171 | 3.0000  | 13.0000 | 0.0000 | 1.3139 | 1.1334 | 3.0000   |
| IPI0095171 | IPI0095171 | 11.0000 | 64.7000 | 0.0000 | 0.9232 | 0.9976 | 36.0000  |
| IPI0095166 | IPI0095166 | 2.0000  | 2.3000  | 0.0003 | 1.2414 | NaN    | 0.0000   |
| IPI0095165 | IPI0095165 | 5.0000  | 33.7000 | 0.0000 | 1.0605 | 1.6857 | 3.0000   |
| IPI0095161 | IPI0095161 | 1.0000  | 1.5000  | 0.0002 | NaN    | NaN    | 0.0000   |
| IPI0095160 | IPI0095160 | 15.0000 | 29.7000 | 0.0000 | 0.9634 | 0.9554 | 16.0000  |
| IPI0095135 | IPI0095135 | 2.0000  | 2.9000  | 0.0002 | NaN    | 0.9678 | 2.0000   |
| IPI0095131 | IPI0095131 | 17.0000 | 58.7000 | 0.0000 | 0.4653 | NaN    | 1.0000   |
| IPI0095121 | IPI0095121 | 19.0000 | 75.6000 | 0.0000 | 0.9791 | 0.9834 | 73.0000  |
| IPI0095121 | IPI0095121 | 2.0000  | 5.4000  | 0.0000 | 1.1746 | 1.2412 | 2.0000   |
| IPI0095120 | IPI0095120 | 13.0000 | 28.1000 | 0.0000 | 1.0465 | 0.9497 | 25.0000  |
| IPI0095119 | IPI0095119 | 5.0000  | 4.6000  | 0.0000 | 0.8893 | 1.3857 | 2.0000   |
| IPI0095107 | IPI0095107 | 4.0000  | 4.7000  | 0.0000 | 0.9722 | NaN    | 1.0000   |
| IPI0095105 | IPI0095105 | 20.0000 | 42.7000 | 0.0000 | 0.8246 | 0.9388 | 34.0000  |
| IPI0095105 | IPI0095105 | 23.0000 | 32.1000 | 0.0000 | 0.9757 | 1.0037 | 63.0000  |
| IPI0095096 | IPI0095096 | 2.0000  | 4.6000  | 0.0003 | NaN    | 0.8672 | 3.0000   |
| IPI0095096 | IPI0095096 | 7.0000  | 51.1000 | 0.0000 | 1.0703 | 0.9801 | 10.0000  |
| IPI0095089 | IPI0095089 | 12.0000 | 78.3000 | 0.0000 | 1.0570 | 1.0229 | 53.0000  |
| IPI0095088 | IPI0095088 | 2.0000  | 15.0000 | 0.0000 | 0.8559 | 1.0120 | 2.0000   |

|            |            |         |         |        |        |
|------------|------------|---------|---------|--------|--------|
| IPI0039034 | P21533;Q6  | 13.8000 | 5.0000  | 0.0000 | 1.1373 |
| IPI0020828 | O35303-1;C | 13.0000 | 8.0000  | 0.0000 | 1.1389 |
| IPI0023101 | P19490-2;F | 5.4000  | 5.0000  | 0.0000 | 1.1389 |
| IPI0019570 | P17074     | 28.2000 | 5.0000  | 0.0000 | 1.1395 |
| IPI0021277 | P62909     | 27.2000 | 6.0000  | 0.0000 | 1.1398 |
| IPI0033901 | P62907;Q4  | 7.4000  | 2.0000  | 0.0000 | 1.1398 |
| IPI0037000 | Q5U2S7     | 18.1000 | 11.0000 | 0.0000 | 1.1403 |
| IPI0076447 | B2GV74     | 15.0000 | 9.0000  | 0.0000 | 1.1403 |
| IPI0023091 | P41123     | 20.4000 | 4.0000  | 0.0000 | 1.1413 |
| IPI0042162 | P29314     | 20.1000 | 7.0000  | 0.0000 | 1.1428 |
| IPI0078173 | P27952;O5  | 17.4000 | 5.0000  | 0.0000 | 1.1430 |
| IPI0056275 | Q2P9S1     | 6.1000  | 10.0000 | 0.0000 | 1.1433 |
| IPI0036490 | Q2PQA9     | 8.0000  | 8.0000  | 0.0000 | 1.1441 |
| IPI0076533 | Q642E2;P1  | 28.5000 | 5.0000  | 0.0000 | 1.1441 |
| IPI0047547 | P62703     | 16.0000 | 6.0000  | 0.0000 | 1.1462 |
| IPI0020707 | Q62639     | 9.2000  | 2.0000  | 0.0023 | 1.1469 |
| IPI0037375 | P23358;B2F | 8.4000  | 2.0000  | 0.0004 | 1.1472 |
| IPI0020014 | P19945     | 12.6000 | 5.0000  | 0.0000 | 1.1480 |
| IPI0019666 | P68255     | 23.3000 | 6.0000  | 0.0000 | 1.1485 |
| IPI0037304 | Q5RKG9     | 5.4000  | 4.0000  | 0.0000 | 1.1487 |
| IPI0039130 | P70620;Q9  | 16.6000 | 39.0000 | 0.0000 | 1.1489 |
| IPI0036639 | Q641X8     | 16.6000 | 8.0000  | 0.0000 | 1.1503 |
| IPI0076453 | P85970     | 15.3000 | 5.0000  | 0.0000 | 1.1507 |
| IPI0037281 | Q1JU68;Q4  | 7.1000  | 11.0000 | 0.0000 | 1.1516 |
| IPI0023130 | P19527     | 9.6000  | 6.0000  | 0.0000 | 1.1527 |
| IPI0020228 | B0BN93     | 16.8000 | 7.0000  | 0.0000 | 1.1538 |
| IPI0021465 | P62850-1;F | 14.3000 | 2.0000  | 0.0000 | 1.1539 |
| IPI0047152 | Q68FR9-2;C | 6.9000  | 4.0000  | 0.0000 | 1.1543 |
| IPI0039528 | P21531     | 14.1000 | 7.0000  | 0.0000 | 1.1556 |
| IPI0020321 | P05197;Q8  | 18.8000 | 19.0000 | 0.0000 | 1.1559 |
| IPI0076522 | P62278     | 16.8000 | 3.0000  | 0.0000 | 1.1564 |
| IPI0095121 | P62282;Q6  | 25.6000 | 5.0000  | 0.0000 | 1.1566 |
| IPI0076607 | Q5I0G4     | 12.0000 | 12.0000 | 0.0000 | 1.1578 |
| IPI0019772 | P04646     | 27.3000 | 4.0000  | 0.0000 | 1.1589 |
| IPI0036188 | Q5FWT0;Q   | 35.3000 | 4.0000  | 0.0000 | 1.1604 |
| IPI0047563 | P85108;Q4  | 15.7000 | 7.0000  | 0.0000 | 1.1607 |
| IPI0036028 | Q5XIT1     | 14.2000 | 4.0000  | 0.0000 | 1.1609 |
| IPI0019133 | P09951-1;F | 17.3000 | 9.0000  | 0.0000 | 1.1611 |
| IPI0094893 | Q5BJU2     | 5.4000  | 5.0000  | 0.0000 | 1.1612 |
| IPI0021520 | P62919     | 21.8000 | 6.0000  | 0.0000 | 1.1615 |
| IPI0038808 | P61314     | 12.1000 | 3.0000  | 0.0000 | 1.1628 |
| IPI0021329 | Q66HR2;Q3  | 17.9000 | 5.0000  | 0.0000 | 1.1640 |

eF2

|            |            |         |         |        |        |        |         |
|------------|------------|---------|---------|--------|--------|--------|---------|
| IPI0095083 | IPI0095083 | 10.0000 | 20.0000 | 0.0000 | 1.2936 | 1.2510 | 7.0000  |
| IPI0095081 | IPI0095081 | 10.0000 | 13.6000 | 0.0000 | 1.0989 | 0.9918 | 20.0000 |
| IPI0095079 | IPI0095079 | 10.0000 | 12.6000 | 0.0000 | 0.8452 | 1.0124 | 11.0000 |
| IPI0095076 | IPI0095076 | 3.0000  | 2.7000  | 0.0000 | NaN    | 0.9330 | 4.0000  |
| IPI0095073 | IPI0095073 | 2.0000  | 2.6000  | 0.0002 | 0.7462 | NaN    | 0.0000  |
| IPI0095073 | IPI0095073 | 35.0000 | 39.9000 | 0.0000 | 0.9488 | 0.9727 | 85.0000 |
| IPI0095056 | IPI0095056 | 19.0000 | 74.8000 | 0.0000 | 0.9687 | 0.9724 | 57.0000 |
| IPI0095049 | IPI0095049 | 4.0000  | 10.1000 | 0.0000 | 0.9514 | 1.0787 | 8.0000  |
| IPI0095041 | IPI0095041 | 1.0000  | 15.4000 | 0.0000 | 0.9560 | NaN    | 0.0000  |
| IPI0095038 | IPI0095038 | 9.0000  | 7.1000  | 0.0000 | 0.9960 | 0.9754 | 2.0000  |
| IPI0095035 | IPI0095035 | 3.0000  | 6.4000  | 0.0000 | 0.8028 | 1.1112 | 4.0000  |
| IPI0095026 | IPI0095026 | 5.0000  | 27.6000 | 0.0000 | 0.7785 | 0.9369 | 7.0000  |
| IPI0095018 | IPI0095018 | 15.0000 | 19.8000 | 0.0000 | 0.9944 | 1.0420 | 22.0000 |
| IPI0095008 | IPI0095008 | 11.0000 | 39.9000 | 0.0000 | 0.9509 | 0.9425 | 20.0000 |
| IPI0095005 | IPI0095005 | 5.0000  | 13.8000 | 0.0000 | 1.2344 | 1.1939 | 3.0000  |
| IPI0095004 | IPI0095004 | 10.0000 | 4.9000  | 0.0000 | 0.9536 | 0.9477 | 8.0000  |
| IPI0095004 | IPI0095004 | 4.0000  | 7.3000  | 0.0000 | 1.4292 | 0.5784 | 3.0000  |
| IPI0095003 | IPI0095003 | 12.0000 | 33.5000 | 0.0000 | NaN    | 1.3469 | 2.0000  |
| IPI0095001 | IPI0095001 | 2.0000  | 2.5000  | 0.0003 | NaN    | NaN    | 1.0000  |
| IPI0094990 | IPI0094990 | 14.0000 | 40.9000 | 0.0000 | 1.0068 | 0.9357 | 35.0000 |
| IPI0094988 | IPI0094988 | 25.0000 | 26.4000 | 0.0000 | NaN    | NaN    | 1.0000  |
| IPI0094986 | IPI0094986 | 2.0000  | 19.3000 | 0.0000 | NaN    | NaN    | 0.0000  |
| IPI0094983 | IPI0094983 | 3.0000  | 0.7000  | 0.0000 | 1.0840 | 0.9050 | 3.0000  |
| IPI0094982 | IPI0094982 | 4.0000  | 3.8000  | 0.0000 | 1.3234 | 0.9986 | 4.0000  |
| IPI0094977 | IPI0094977 | 3.0000  | 7.3000  | 0.0000 | 0.5913 | NaN    | 1.0000  |
| IPI0094972 | IPI0094972 | 1.0000  | 5.1000  | 0.0000 | NaN    | NaN    | 1.0000  |
| IPI0094967 | IPI0094967 | 3.0000  | 14.8000 | 0.0000 | 1.0993 | 1.0081 | 6.0000  |
| IPI0094966 | IPI0094966 | 9.0000  | 50.9000 | 0.0000 | 0.9488 | 0.9576 | 37.0000 |
| IPI0094961 | IPI0094961 | 3.0000  | 9.0000  | 0.0000 | 1.0148 | 1.1112 | 8.0000  |
| IPI0094961 | IPI0094961 | 3.0000  | 1.8000  | 0.0000 | 1.0209 | NaN    | 0.0000  |
| IPI0094957 | IPI0094957 | 8.0000  | 13.3000 | 0.0000 | 1.0656 | 1.0187 | 9.0000  |
| IPI0094951 | IPI0094951 | 28.0000 | 82.5000 | 0.0000 | 1.0103 | 0.9707 | 65.0000 |
| IPI0094942 | IPI0094942 | 27.0000 | 44.0000 | 0.0000 | 1.0851 | 0.9392 | 38.0000 |
| IPI0094925 | IPI0094925 | 6.0000  | 10.2000 | 0.0000 | 0.8883 | 1.1794 | 4.0000  |
| IPI0094924 | IPI0094924 | 7.0000  | 11.7000 | 0.0000 | 0.8153 | 0.8851 | 10.0000 |
| IPI0094921 | IPI0094921 | 30.0000 | 27.7000 | 0.0000 | 1.0643 | 0.9752 | 58.0000 |
| IPI0094921 | IPI0094921 | 6.0000  | 6.2000  | 0.0000 | 0.9794 | 0.9690 | 6.0000  |
| IPI0094919 | IPI0094919 | 2.0000  | 1.9000  | 0.0000 | 0.9650 | 0.8995 | 4.0000  |
| IPI0094916 | IPI0094916 | 5.0000  | 37.3000 | 0.0000 | 0.8404 | 0.9029 | 20.0000 |
| IPI0094912 | IPI0094912 | 11.0000 | 32.2000 | 0.0000 | 1.0446 | 0.8857 | 14.0000 |
| IPI0094911 | IPI0094911 | 4.0000  | 7.0000  | 0.0000 | 0.9769 | 0.9747 | 16.0000 |
| IPI0094902 | IPI0094902 | 1.0000  | 0.6000  | 0.0002 | NaN    | NaN    | 1.0000  |

|            |            |         |         |        |        |
|------------|------------|---------|---------|--------|--------|
| IPI0079861 | Q2TA68-2;C | 9.0000  | 9.0000  | 0.0000 | 1.1652 |
| IPI0021173 | P62193     | 8.9000  | 4.0000  | 0.0000 | 1.1672 |
| IPI0036961 | Q6P3V8;Q8  | 11.3000 | 5.0000  | 0.0000 | 1.1678 |
| IPI0032750 | Q810W7-1;  | 5.7000  | 8.0000  | 0.0000 | 1.1685 |
| IPI0033914 | P63039     | 23.0000 | 13.0000 | 0.0000 | 1.1685 |
| IPI0023169 | P62845;Q6  | 15.2000 | 2.0000  | 0.0026 | 1.1690 |
| IPI0092312 | P86173     | 4.7000  | 2.0000  | 0.0023 | 1.1695 |
| IPI0020084 | Q99PD4;Q6  | 9.2000  | 4.0000  | 0.0000 | 1.1706 |
| IPI0021056 | P82995;Q6  | 19.6000 | 15.0000 | 0.0000 | 1.1708 |
| IPI0021251 | O88761;A1  | 6.2000  | 5.0000  | 0.0000 | 1.1723 |
| IPI0036356 | P50475     | 12.0000 | 14.0000 | 0.0000 | 1.1726 |
| IPI0065525 | Q3KRE8     | 15.7000 | 7.0000  | 0.0000 | 1.1730 |
| IPI0020803 | Q6P9U8     | 10.2000 | 4.0000  | 0.0000 | 1.1738 |
| IPI0021458 | P62083;B5  | 12.9000 | 3.0000  | 0.0003 | 1.1743 |
| IPI0019047 | P37285-1;F | 18.0000 | 12.0000 | 0.0000 | 1.1752 |
| IPI0038786 | O88600     | 18.6000 | 15.0000 | 0.0000 | 1.1761 |
| IPI0032763 | P38650;Q6  | 15.3000 | 82.0000 | 0.0000 | 1.1769 |
| IPI0019477 | O08678     | 16.3000 | 10.0000 | 0.0000 | 1.1771 |
| IPI0019039 | Q63569;Q6  | 8.2000  | 4.0000  | 0.0000 | 1.1782 |
| IPI0020432 | P21575-5;F | 7.9000  | 7.0000  | 0.0000 | 1.1785 |
| IPI0023120 | P62243;B2F | 15.9000 | 3.0000  | 0.0000 | 1.1817 |
| IPI0036528 | Q5X132     | 19.1000 | 5.0000  | 0.0000 | 1.1900 |
| IPI0021031 | P39052-1;F | 4.3000  | 4.0000  | 0.0000 | 1.1905 |
| IPI0082946 | Q07936-2;C | 6.2000  | 2.0000  | 0.0000 | 1.1906 |
| IPI0019927 | P63074     | 12.4000 | 2.0000  | 0.0053 | 1.1911 |
| IPI0021094 | Q63604-1;C | 5.4000  | 4.0000  | 0.0000 | 1.1915 |
| IPI0036793 | Q9WV63-2;  | 8.6000  | 7.0000  | 0.0000 | 1.1927 |
| IPI0019340 | P56536     | 18.2000 | 16.0000 | 0.0000 | 1.1928 |
| IPI0021488 | P40112     | 17.1000 | 3.0000  | 0.0000 | 1.1931 |
| IPI0067917 | P19332-4;F | 25.3000 | 11.0000 | 0.0000 | 1.1945 |
| IPI0039021 | O70441     | 12.4000 | 5.0000  | 0.0000 | 1.1960 |
| IPI0036629 | Q6AYK8     | 3.8000  | 2.0000  | 0.0000 | 1.1973 |
| IPI0036326 | P48721     | 20.5000 | 13.0000 | 0.0000 | 1.2049 |
| IPI0021003 | Q63537-1;C | 8.5000  | 4.0000  | 0.0000 | 1.2063 |
| IPI0038925 | Q5X112;Q9  | 1.8000  | 4.0000  | 0.0000 | 1.2081 |
| IPI0020883 | P97879-1;F | 2.4000  | 3.0000  | 0.0048 | 1.2100 |
| IPI0021355 | Q64548-1;C | 7.3000  | 6.0000  | 0.0000 | 1.2104 |
| IPI0021121 | Q3T1J1;Q8  | 9.7000  | 2.0000  | 0.0000 | 1.2117 |
| IPI0020539 | O35095     | 8.5000  | 6.0000  | 0.0000 | 1.2120 |
| IPI0021197 | Q63798     | 8.8000  | 3.0000  | 0.0000 | 1.2123 |
| IPI0036377 | Q4G061     | 14.4000 | 11.0000 | 0.0000 | 1.2129 |
| IPI0036921 | Q5XHZO     | 12.2000 | 9.0000  | 0.0000 | 1.2146 |

|            |            |         |         |        |        |        |         |
|------------|------------|---------|---------|--------|--------|--------|---------|
| IPI0094901 | IPI0094901 | 52.0000 | 91.3000 | 0.0000 | 0.9680 | 0.9606 | 17.0000 |
| IPI0094895 | IPI0094895 | 5.0000  | 18.7000 | 0.0000 | 0.9080 | 0.8936 | 4.0000  |
| IPI0094893 | IPI0094893 | 12.0000 | 18.9000 | 0.0000 | 0.9494 | 0.9961 | 25.0000 |
| IPI0094886 | IPI0094886 | 40.0000 | 55.3000 | 0.0000 | 0.9496 | 0.9489 | 99.0000 |
| IPI0094886 | IPI0094886 | 1.0000  | 3.8000  | 0.0002 | NaN    | NaN    | 0.0000  |
| IPI0094881 | IPI0094881 | 3.0000  | 25.1000 | 0.0000 | 0.9908 | 0.8299 | 6.0000  |
| IPI0094865 | IPI0094865 | 3.0000  | 12.1000 | 0.0000 | 1.1635 | 1.3111 | 2.0000  |
| IPI0094863 | IPI0094863 | 4.0000  | 17.7000 | 0.0000 | 0.9953 | 1.1104 | 14.0000 |
| IPI0094859 | IPI0094859 | 2.0000  | 5.2000  | 0.0000 | NaN    | 1.0658 | 4.0000  |
| IPI0094859 | IPI0094859 | 20.0000 | 49.9000 | 0.0000 | 1.0143 | 1.0177 | 54.0000 |
| IPI0094852 | IPI0094852 | 34.0000 | 73.5000 | 0.0000 | 0.9280 | 0.9168 | 96.0000 |
| IPI0094846 | IPI0094846 | 2.0000  | 10.9000 | 0.0000 | 2.0042 | NaN    | 1.0000  |
| IPI0094837 | IPI0094837 | 5.0000  | 7.9000  | 0.0000 | 0.6953 | NaN    | 1.0000  |
| IPI0094836 | IPI0094836 | 9.0000  | 47.0000 | 0.0000 | 0.9675 | 0.9430 | 18.0000 |
| IPI0094830 | IPI0094830 | 4.0000  | 23.6000 | 0.0000 | 2.7625 | 1.0908 | 6.0000  |
| IPI0094830 | IPI0094830 | 19.0000 | 56.0000 | 0.0000 | 0.9577 | 0.9687 | 73.0000 |
| IPI0094830 | IPI0094830 | 11.0000 | 17.1000 | 0.0000 | 0.9682 | 0.9954 | 18.0000 |
| IPI0094824 | IPI0094824 | 2.0000  | 2.8000  | 0.0000 | 0.9332 | NaN    | 1.0000  |
| IPI0094824 | IPI0094824 | 25.0000 | 32.8000 | 0.0000 | 0.9793 | 0.9550 | 49.0000 |
| IPI0094823 | IPI0094823 | 10.0000 | 17.4000 | 0.0000 | 1.1397 | 1.1098 | 12.0000 |
| IPI0094819 | IPI0094819 | 20.0000 | 59.4000 | 0.0000 | 0.9846 | 0.9554 | 35.0000 |
| IPI0094808 | IPI0094808 | 2.0000  | 3.0000  | 0.0000 | 1.0938 | 1.2938 | 3.0000  |
| IPI0094806 | IPI0094806 | 3.0000  | 12.8000 | 0.0000 | 1.0543 | NaN    | 1.0000  |
| IPI0094789 | IPI0094789 | 3.0000  | 15.3000 | 0.0000 | 0.8902 | 1.0562 | 7.0000  |
| IPI0094786 | IPI0094786 | 4.0000  | 5.9000  | 0.0000 | 0.8541 | NaN    | 1.0000  |
| IPI0094775 | IPI0094775 | 6.0000  | 26.6000 | 0.0000 | 1.1286 | 0.9351 | 13.0000 |
| IPI0094772 | IPI0094772 | 2.0000  | 7.5000  | 0.0000 | 0.7788 | 1.2006 | 2.0000  |
| IPI0094769 | IPI0094769 | 10.0000 | 2.7000  | 0.0000 | 1.0541 | 0.7174 | 5.0000  |
| IPI0094422 | IPI0094422 | 4.0000  | 20.7000 | 0.0000 | 0.9074 | 0.9904 | 4.0000  |
| IPI0094421 | IPI0094421 | 2.0000  | 8.8000  | 0.0000 | NaN    | NaN    | 1.0000  |
| IPI0094421 | IPI0094421 | 2.0000  | 3.5000  | 0.0000 | 1.3074 | 1.2122 | 2.0000  |
| IPI0092313 | IPI0092313 | 10.0000 | 51.6000 | 0.0000 | 1.0325 | 0.9974 | 23.0000 |
| IPI0092312 | IPI0092312 | 7.0000  | 23.0000 | 0.0000 | 1.1792 | 1.2376 | 8.0000  |
| IPI0091556 | IPI0091556 | 22.0000 | 92.7000 | 0.0000 | 0.9300 | 0.9470 | 62.0000 |
| IPI0091476 | IPI0091476 | 2.0000  | 5.0000  | 0.0001 | 0.9977 | 1.1845 | 2.0000  |
| IPI0091474 | IPI0091474 | 5.0000  | 43.5000 | 0.0000 | 1.1578 | 0.9990 | 12.0000 |
| IPI0091427 | IPI0091427 | 2.0000  | 13.0000 | 0.0000 | 0.7462 | NaN    | 1.0000  |
| IPI0091427 | IPI0091427 | 1.0000  | 4.5000  | 0.0000 | NaN    | 0.8501 | 3.0000  |
| IPI0091426 | IPI0091426 | 6.0000  | 18.4000 | 0.0000 | 1.9476 | 1.2716 | 10.0000 |
| IPI0091425 | IPI0091425 | 2.0000  | 5.9000  | 0.0000 | 1.2177 | NaN    | 0.0000  |
| IPI0091422 | IPI0091422 | 5.0000  | 10.2000 | 0.0000 | 1.3772 | 0.9985 | 5.0000  |
| IPI0091422 | IPI0091422 | 6.0000  | 9.4000  | 0.0000 | 0.8170 | NaN    | 1.0000  |

|             |            |         |         |        |        |
|-------------|------------|---------|---------|--------|--------|
| IPI0056836  | Q7M0E3     | 18.8000 | 3.0000  | 0.0000 | 1.2170 |
| IPI0037341  | Q6P799     | 6.2000  | 3.0000  | 0.0000 | 1.2178 |
| IPI0032438  | P32851;Q9  | 6.2000  | 2.0000  | 0.0000 | 1.2181 |
| IPI0076829  | B2GV73     | 13.5000 | 3.0000  | 0.0000 | 1.2229 |
| IPI0037058  | P25886     | 9.8000  | 2.0000  | 0.0000 | 1.2231 |
| IPI0048084  | Q5U211;B0  | 22.2000 | 4.0000  | 0.0000 | 1.2238 |
| IPI0056374  | Q63186     | 9.6000  | 4.0000  | 0.0000 | 1.2245 |
| IPI0056425  | P62425;B0  | 7.6000  | 2.0000  | 0.0000 | 1.2265 |
| IPI0036355  | Q99376     | 13.9000 | 11.0000 | 0.0000 | 1.2266 |
| IPI0095196  | P45592     | 16.8000 | 4.0000  | 0.0000 | 1.2308 |
| IPI0023112  | Q64548-2;C | 16.3000 | 4.0000  | 0.0000 | 1.2407 |
| IPI0045422  | Q6RW62;Q   | 1.2000  | 4.0000  | 0.0000 | 1.2422 |
| IPI0036163  | Q5XID7     | 5.5000  | 2.0000  | 0.0011 | 1.2439 |
| IPI0036916  | Q2HWF0-2   | 9.5000  | 5.0000  | 0.0000 | 1.2491 |
| IPI0067921  | A0JN25;P1  | 37.3000 | 10.0000 | 0.0000 | 1.2508 |
| IPI0037031  | Q5XI72     | 10.5000 | 3.0000  | 0.0000 | 1.2550 |
| IPI0019811  | P34926;Q6  | 6.1000  | 16.0000 | 0.0000 | 1.2608 |
| IPI0036025  | P63326     | 8.9000  | 2.0000  | 0.0000 | 1.2650 |
| IPI0020632  | Q8VH46     | 4.0000  | 3.0000  | 0.0000 | 1.2650 |
| IPI0040057  | Q6P9T8     | 15.7000 | 7.0000  | 0.0000 | 1.2666 |
| IPI0020622  | P15178;A9  | 5.8000  | 3.0000  | 0.0000 | 1.3014 |
| IPI0036525  | Q5XI37     | 8.2000  | 2.0000  | 0.0032 | 1.3112 |
| IPI0020875  | Q70319;O8  | 9.9000  | 3.0000  | 0.0000 | 1.3135 |
| IPI0078236  | Q6IRJ7;Q8V | 3.9000  | 2.0000  | 0.0002 | 1.3224 |
| IPI0021014  | Q9Z2Q1-1;C | 4.7000  | 6.0000  | 0.0000 | 1.3235 |
| IPI0088241  | Q6IRS8;Q6  | 8.3000  | 2.0000  | 0.0000 | 1.3403 |
| IPI0018880  | P02401     | 57.4000 | 4.0000  | 0.0000 | 1.3430 |
| IPI0019352  | Q4KM74     | 26.0000 | 5.0000  | 0.0000 | 1.3620 |
| IPI0037173  | Q5PQM2     | 8.4000  | 5.0000  | 0.0000 | 1.3870 |
| IPI0020832  | B2RYN3     | 10.3000 | 2.0000  | 0.0005 | 1.3958 |
| IPI0019174  | P18421;Q6  | 19.2000 | 4.0000  | 0.0000 | 1.4131 |
| IPI0042132  | Q6TUH3;P2  | 2.2000  | 2.0000  | 0.0012 | 0.6878 |
| IPI00359650 |            | 8.7000  | 2.0000  | 0.0000 | 0.6976 |
| IPI00949260 | IPI0039399 | 2.9000  | 2.0000  | 0.0013 | 0.7221 |
| IPI0035840  | Q5U302     | 5.4000  | 4.0000  | 0.0000 | 0.7231 |
| IPI0036486  | B5DFK4;Q4  | 1.8000  | 3.0000  | 0.0068 | 0.7274 |
| IPI0076474  | Q5D008     | 1.8000  | 2.0000  | 0.0000 | 0.7437 |
| IPI0023094  | P31000     | 24.0000 | 12.0000 | 0.0000 | 0.7571 |
| IPI00200762 | IPI0076428 | 23.2000 | 2.0000  | 0.0000 | 0.7635 |
| IPI00372759 |            | 3.1000  | 3.0000  | 0.0000 | 0.7678 |
| IPI0056550  | Q7TT47     | 2.8000  | 2.0000  | 0.0000 | 0.7745 |
| IPI0076387  | Q4V8E2     | 6.9000  | 3.0000  | 0.0000 | 0.7804 |

|            |            |         |         |        |        |        |          |
|------------|------------|---------|---------|--------|--------|--------|----------|
| IPI0091419 | IPI0091419 | 2.0000  | 29.4000 | 0.0000 | 0.9636 | 0.9355 | 3.0000   |
| IPI0091419 | IPI0091419 | 5.0000  | 42.4000 | 0.0000 | 0.9469 | 0.7820 | 5.0000   |
| IPI0091418 | IPI0091418 | 25.0000 | 33.8000 | 0.0000 | 0.9887 | 1.0217 | 34.0000  |
| IPI0091417 | IPI0091417 | 3.0000  | 38.4000 | 0.0000 | NaN    | NaN    | 0.0000   |
| IPI0091417 | IPI0091417 | 3.0000  | 21.7000 | 0.0000 | 0.9954 | 1.0433 | 2.0000   |
| IPI0091417 | IPI0091417 | 5.0000  | 9.8000  | 0.0000 | 1.1383 | 0.9805 | 3.0000   |
| IPI0091128 | IPI0091128 | 7.0000  | 21.9000 | 0.0000 | 0.9628 | 0.9844 | 7.0000   |
| IPI0090343 | IPI0090343 | 20.0000 | 60.7000 | 0.0000 | 0.9248 | 0.9809 | 35.0000  |
| IPI0090049 | IPI0090049 | 1.0000  | 4.0000  | 0.0007 | 1.0322 | NaN    | 0.0000   |
| IPI0089678 | IPI0089678 | 11.0000 | 52.1000 | 0.0000 | 0.9160 | 0.9903 | 39.0000  |
| IPI0089677 | IPI0089677 | 7.0000  | 9.1000  | 0.0000 | 0.8635 | 0.8019 | 4.0000   |
| IPI0089676 | IPI0089676 | 46.0000 | 82.8000 | 0.0000 | 0.9800 | 1.0088 | 187.0000 |
| IPI0089675 | IPI0089675 | 1.0000  | 4.7000  | 0.0000 | 1.0227 | NaN    | 1.0000   |
| IPI0089623 | IPI0089623 | 5.0000  | 44.7000 | 0.0000 | 0.9591 | 0.9796 | 14.0000  |
| IPI0089622 | IPI0089622 | 59.0000 | 99.5000 | 0.0000 | 0.9472 | 0.9617 | 528.0000 |
| IPI0089622 | IPI0089622 | 4.0000  | 10.9000 | 0.0000 | 1.0778 | 0.9758 | 5.0000   |
| IPI0089619 | IPI0089619 | 2.0000  | 10.3000 | 0.0002 | 0.3205 | NaN    | 0.0000   |
| IPI0089618 | IPI0089618 | 3.0000  | 5.8000  | 0.0000 | NaN    | 1.1486 | 2.0000   |
| IPI0089618 | IPI0089618 | 25.0000 | 36.1000 | 0.0000 | 0.9086 | 0.9338 | 31.0000  |
| IPI0089617 | IPI0089617 | 4.0000  | 7.3000  | 0.0000 | 1.0702 | 1.3229 | 2.0000   |
| IPI0089557 | IPI0089557 | 1.0000  | 32.5000 | 0.0000 | NaN    | 0.7517 | 5.0000   |
| IPI0088933 | IPI0088933 | 27.0000 | 71.2000 | 0.0000 | 0.9470 | 0.9920 | 95.0000  |
| IPI0088647 | IPI0088647 | 24.0000 | 77.5000 | 0.0000 | 1.0053 | 1.0122 | 68.0000  |
| IPI0088647 | IPI0088647 | 16.0000 | 73.4000 | 0.0000 | 0.9850 | 0.9469 | 31.0000  |
| IPI0088643 | IPI0088643 | 1.0000  | 10.1000 | 0.0000 | NaN    | 0.7143 | 3.0000   |
| IPI0088458 | IPI0088458 | 11.0000 | 19.1000 | 0.0000 | 1.1215 | 0.8601 | 19.0000  |
| IPI0088456 | IPI0088456 | 24.0000 | 57.0000 | 0.0000 | 1.0149 | 1.0141 | 77.0000  |
| IPI0088248 | IPI0088248 | 19.0000 | 61.0000 | 0.0000 | 1.0947 | 1.0221 | 94.0000  |
| IPI0088243 | IPI0088243 | 1.0000  | 11.9000 | 0.0002 | 0.7631 | NaN    | 1.0000   |
| IPI0087738 | IPI0087738 | 12.0000 | 87.1000 | 0.0000 | 0.9917 | 1.0151 | 28.0000  |
| IPI0087663 | IPI0087663 | 17.0000 | 19.4000 | 0.0000 | 0.9899 | 1.0976 | 33.0000  |
| IPI0087661 | IPI0087661 | 7.0000  | 5.1000  | 0.0000 | 1.3695 | NaN    | 1.0000   |
| IPI0087660 | IPI0087660 | 10.0000 | 6.5000  | 0.0000 | 1.2795 | 0.9652 | 9.0000   |
| IPI0087660 | IPI0087660 | 9.0000  | 24.5000 | 0.0000 | 1.3054 | 1.0531 | 11.0000  |
| IPI0087660 | IPI0087660 | 37.0000 | 58.7000 | 0.0000 | 0.9078 | 1.0703 | 50.0000  |
| IPI0087659 | IPI0087659 | 16.0000 | 24.1000 | 0.0000 | 1.0321 | 1.0012 | 30.0000  |
| IPI0087658 | IPI0087658 | 12.0000 | 14.9000 | 0.0000 | 0.8149 | 0.9209 | 12.0000  |
| IPI0087658 | IPI0087658 | 21.0000 | 57.6000 | 0.0000 | 1.2399 | 1.0229 | 35.0000  |
| IPI0087657 | IPI0087657 | 2.0000  | 6.4000  | 0.0000 | 0.6033 | 0.5971 | 2.0000   |
| IPI0087657 | IPI0087657 | 2.0000  | 16.0000 | 0.0003 | NaN    | 1.0951 | 5.0000   |
| IPI0087086 | IPI0087086 | 1.0000  | 12.8000 | 0.0000 | NaN    | 0.4964 | 2.0000   |
| IPI0087084 | IPI0087084 | 1.0000  | 8.8000  | 0.0004 | NaN    | NaN    | 0.0000   |

|             |            |         |         |        |        |
|-------------|------------|---------|---------|--------|--------|
| IPI0076833  | O35828     | 2.1000  | 2.0000  | 0.0001 | 0.7840 |
| IPI0095231  | Q91XJ0     | 5.5000  | 2.0000  | 0.0016 | 0.7847 |
| IPI0019897  | Q5XIC6     | 6.6000  | 3.0000  | 0.0000 | 0.7862 |
| IPI0035991  | Q5M943     | 8.5000  | 3.0000  | 0.0012 | 0.7879 |
| IPI0076340  | B2RYT0     | 23.0000 | 2.0000  | 0.0000 | 0.7923 |
| IPI0023190  | P55051     | 15.9000 | 2.0000  | 0.0000 | 0.8025 |
| IPI00782434 |            | 1.9000  | 2.0000  | 0.0000 | 0.8057 |
| IPI00357902 |            | 3.8000  | 2.0000  | 0.0000 | 0.8081 |
| IPI0039021  | Q9Z1A5;A1  | 5.6000  | 3.0000  | 0.0005 | 0.8106 |
| IPI0036083  | Q5PQN1     | 2.1000  | 2.0000  | 0.0000 | 0.8214 |
| IPI0047188  | P14668;O7  | 6.6000  | 2.0000  | 0.0002 | 0.8217 |
| IPI0076569  | Q9R037     | 4.2000  | 3.0000  | 0.0002 | 0.8222 |
| IPI00373532 |            | 1.4000  | 2.0000  | 0.0000 | 0.8238 |
| IPI00365235 |            | 19.4000 | 2.0000  | 0.0002 | 0.8352 |
| IPI00370658 |            | 4.0000  | 3.0000  | 0.0001 | 0.8387 |
| IPI0087662  | P35284     | 7.4000  | 2.0000  | 0.0002 | 0.8413 |
| IPI00367525 |            | 2.2000  | 4.0000  | 0.0000 | 0.8426 |
| IPI0021011  | Q62902     | 5.2000  | 3.0000  | 0.0000 | 0.8432 |
| IPI0077947  | B2RYB3     | 2.6000  | 2.0000  | 0.0000 | 0.8438 |
| IPI0040953  | C0JPT7     | 6.7000  | 14.0000 | 0.0000 | 0.8465 |
| IPI0079863  | Q9JJP9     | 6.0000  | 2.0000  | 0.0000 | 0.8482 |
| IPI0032576  | Q8CG45     | 7.4000  | 2.0000  | 0.0000 | 0.8495 |
| IPI0078028  | P97690     | 4.0000  | 5.0000  | 0.0000 | 0.8507 |
| IPI0037063  | Q641X9     | 6.1000  | 2.0000  | 0.0003 | 0.8518 |
| IPI0036933  | Q66H09     | 8.9000  | 2.0000  | 0.0000 | 0.8538 |
| IPI0032559  | P20673;Q4  | 4.3000  | 2.0000  | 0.0000 | 0.8634 |
| IPI0046487  | Q9JHL4-1;C | 7.6000  | 3.0000  | 0.0000 | 0.8638 |
| IPI0019317  | Q8CHN9     | 4.0000  | 5.0000  | 0.0000 | 0.8648 |
| IPI0020605  | Q63198;Q5  | 7.3000  | 6.0000  | 0.0000 | 0.8657 |
| IPI00952328 | IPI0036804 | 2.3000  | 3.0000  | 0.0000 | 0.8665 |
| IPI0045434  | Q62813-2;C | 9.1000  | 3.0000  | 0.0000 | 0.8698 |
| IPI0021003  | Q63531     | 2.7000  | 2.0000  | 0.0233 | 0.8720 |
| IPI0019015  | Q498T4     | 10.1000 | 3.0000  | 0.0000 | 0.8725 |
| IPI0020489  | Q924N5     | 2.5000  | 2.0000  | 0.0073 | 0.8728 |
| IPI00870751 | IPI0094875 | 3.6000  | 7.0000  | 0.0000 | 0.8734 |
| IPI0023173  | P09117     | 14.6000 | 5.0000  | 0.0000 | 0.8735 |
| IPI00564040 |            | 6.2000  | 2.0000  | 0.0000 | 0.8741 |
| IPI0094859  | B1WC11     | 2.4000  | 2.0000  | 0.0193 | 0.8767 |
| IPI0047608  | Q5M7T6     | 8.5000  | 3.0000  | 0.0000 | 0.8790 |
| IPI00568148 |            | 3.6000  | 2.0000  | 0.0002 | 0.8832 |
| IPI0021449  | P31662     | 3.4000  | 2.0000  | 0.0000 | 0.8839 |
| IPI0021231  | O35763     | 10.7000 | 7.0000  | 0.0000 | 0.8845 |

|            |            |         |         |        |        |        |          |
|------------|------------|---------|---------|--------|--------|--------|----------|
| IPI0087082 | IPI0087082 | 7.0000  | 37.0000 | 0.0000 | 1.1122 | 1.0012 | 17.0000  |
| IPI0087080 | IPI0087080 | 5.0000  | 33.8000 | 0.0000 | 0.8947 | 0.9977 | 9.0000   |
| IPI0087077 | IPI0087077 | 12.0000 | 10.9000 | 0.0000 | 0.9874 | 0.9461 | 19.0000  |
| IPI0087071 | IPI0087071 | 5.0000  | 27.6000 | 0.0000 | 0.9435 | 0.8074 | 10.0000  |
| IPI0087070 | IPI0087070 | 4.0000  | 3.3000  | 0.0000 | 1.3173 | NaN    | 0.0000   |
| IPI0087064 | IPI0087064 | 2.0000  | 8.3000  | 0.0000 | 0.7212 | 0.9861 | 4.0000   |
| IPI0087063 | IPI0087063 | 11.0000 | 59.5000 | 0.0000 | 1.1241 | 1.0050 | 31.0000  |
| IPI0087060 | IPI0087060 | 5.0000  | 46.7000 | 0.0000 | 0.9585 | 0.9840 | 5.0000   |
| IPI0087057 | IPI0087057 | 3.0000  | 3.6000  | 0.0000 | 0.8019 | 1.1734 | 2.0000   |
| IPI0087056 | IPI0087056 | 7.0000  | 52.8000 | 0.0000 | 1.0331 | 1.0725 | 19.0000  |
| IPI0087049 | IPI0087049 | 4.0000  | 33.1000 | 0.0000 | 0.9267 | 0.8424 | 4.0000   |
| IPI0087048 | IPI0087048 | 8.0000  | 24.3000 | 0.0000 | 1.1988 | 0.8953 | 12.0000  |
| IPI0087043 | IPI0087043 | 3.0000  | 18.5000 | 0.0000 | NaN    | 0.8508 | 6.0000   |
| IPI0087039 | IPI0087039 | 1.0000  | 0.8000  | 0.0008 | 0.9233 | 0.7754 | 2.0000   |
| IPI0087036 | IPI0087036 | 6.0000  | 14.9000 | 0.0000 | 1.0803 | 1.0743 | 5.0000   |
| IPI0087035 | IPI0087035 | 20.0000 | 27.5000 | 0.0000 | 0.9837 | 1.0474 | 25.0000  |
| IPI0087030 | IPI0087030 | 8.0000  | 23.4000 | 0.0000 | 1.0751 | 1.0151 | 9.0000   |
| IPI0087030 | IPI0087030 | 10.0000 | 78.8000 | 0.0000 | 1.1181 | 0.9183 | 24.0000  |
| IPI0087022 | IPI0087022 | 6.0000  | 45.5000 | 0.0000 | 1.0323 | 0.9187 | 7.0000   |
| IPI0087019 | IPI0087019 | 1.0000  | 5.2000  | 0.0008 | NaN    | NaN    | 1.0000   |
| IPI0087018 | IPI0087018 | 9.0000  | 84.3000 | 0.0000 | 0.9994 | 1.0124 | 25.0000  |
| IPI0087017 | IPI0087017 | 15.0000 | 41.7000 | 0.0000 | 0.9841 | 0.9128 | 47.0000  |
| IPI0087016 | IPI0087016 | 3.0000  | 3.0000  | 0.0000 | NaN    | NaN    | 1.0000   |
| IPI0087014 | IPI0087014 | 6.0000  | 13.6000 | 0.0000 | 1.2943 | 1.0692 | 2.0000   |
| IPI0087012 | IPI0087012 | 26.0000 | 48.2000 | 0.0000 | 0.9518 | 0.8529 | 47.0000  |
| IPI0087011 | IPI0087011 | 3.0000  | 7.2000  | 0.0000 | 0.8559 | 0.7905 | 2.0000   |
| IPI0087011 | IPI0087011 | 62.0000 | 94.1000 | 0.0000 | 0.9698 | 0.9647 | 309.0000 |
| IPI0087008 | IPI0087008 | 6.0000  | 8.4000  | 0.0000 | 1.1096 | 1.0652 | 7.0000   |
| IPI0087001 | IPI0087001 | 1.0000  | 1.1000  | 0.0000 | NaN    | NaN    | 0.0000   |
| IPI0087000 | IPI0087000 | 7.0000  | 32.4000 | 0.0000 | 0.9860 | 1.0101 | 11.0000  |
| IPI0086999 | IPI0086999 | 17.0000 | 63.9000 | 0.0000 | 0.9574 | 0.9462 | 49.0000  |
| IPI0086996 | IPI0086996 | 2.0000  | 9.6000  | 0.0000 | 1.0350 | 0.9675 | 7.0000   |
| IPI0086995 | IPI0086995 | 3.0000  | 15.5000 | 0.0000 | 1.1442 | 1.1090 | 6.0000   |
| IPI0086994 | IPI0086994 | 11.0000 | 47.1000 | 0.0000 | 0.8397 | 0.9071 | 17.0000  |
| IPI0086993 | IPI0086993 | 12.0000 | 24.1000 | 0.0000 | 0.9849 | 0.9969 | 13.0000  |
| IPI0086992 | IPI0086992 | 1.0000  | 5.6000  | 0.0012 | 0.6972 | NaN    | 0.0000   |
| IPI0086992 | IPI0086992 | 18.0000 | 41.1000 | 0.0000 | 0.9273 | 0.9645 | 59.0000  |
| IPI0086981 | IPI0086981 | 29.0000 | 54.8000 | 0.0000 | 0.9145 | 1.0682 | 38.0000  |
| IPI0086980 | IPI0086980 | 22.0000 | 77.1000 | 0.0000 | 0.9618 | 0.9765 | 79.0000  |
| IPI0086977 | IPI0086977 | 6.0000  | 20.4000 | 0.0000 | 0.9493 | 0.9460 | 15.0000  |
| IPI0086976 | IPI0086976 | 6.0000  | 25.5000 | 0.0000 | 0.8755 | 1.0392 | 8.0000   |
| IPI0086967 | IPI0086967 | 10.0000 | 57.0000 | 0.0000 | 0.8486 | 0.8811 | 15.0000  |

|                        |         |        |        |        |
|------------------------|---------|--------|--------|--------|
| IPI0036448 A4L9P7      | 2.4000  | 3.0000 | 0.0000 | 0.8850 |
| IPI00204560            | 3.9000  | 2.0000 | 0.0000 | 0.8855 |
| IPI00361275;IPI0077842 | 2.5000  | 5.0000 | 0.0000 | 0.8857 |
| IPI00870350            | 2.1000  | 3.0000 | 0.0003 | 0.8860 |
| IPI00952315;IPI0036912 | 1.8000  | 2.0000 | 0.0124 | 0.8863 |
| IPI0023126 P97700      | 8.0000  | 2.0000 | 0.0000 | 0.8868 |
| IPI0019029 Q5BJU0      | 11.3000 | 2.0000 | 0.0000 | 0.8870 |
| IPI0039528 Q76EQ0      | 7.8000  | 2.0000 | 0.0226 | 0.8888 |
| IPI0076581 Q562A2      | 4.1000  | 3.0000 | 0.0000 | 0.8915 |
| IPI0023078 O54923      | 2.1000  | 2.0000 | 0.0071 | 0.8926 |
| IPI0036349 C0IXW5;C0   | 0.8000  | 3.0000 | 0.0000 | 0.8942 |
| IPI0084588 A0FKI7-3;A  | 6.3000  | 3.0000 | 0.0000 | 0.8949 |
| IPI0042191 Q6IRE4      | 7.2000  | 3.0000 | 0.0000 | 0.8964 |
| IPI0042138 Q6JE36      | 9.9000  | 3.0000 | 0.0000 | 0.8968 |
| IPI0042208 Q71TY3;P2   | 28.6000 | 2.0000 | 0.0001 | 0.8981 |
| IPI00769138;IPI0035963 | 2.8000  | 3.0000 | 0.0000 | 0.8982 |
| IPI00359082            | 6.2000  | 2.0000 | 0.0000 | 0.9014 |
| IPI0021318 Q9JHW1-1;   | 1.5000  | 2.0000 | 0.0000 | 0.9015 |
| IPI0095205 Q4V8K2      | 3.9000  | 3.0000 | 0.0118 | 0.9019 |
| IPI0032398 P49816-1;P  | 2.2000  | 3.0000 | 0.0000 | 0.9046 |
| IPI0087660 Q8K4V4-1;C  | 6.5000  | 3.0000 | 0.0000 | 0.9070 |
| IPI0023099 P63043-3;P  | 8.3000  | 2.0000 | 0.0000 | 0.9086 |
| IPI0085110 Q1WIM2-1;C  | 4.4000  | 2.0000 | 0.0003 | 0.9087 |
| IPI0076648 O88747      | 2.7000  | 6.0000 | 0.0000 | 0.9087 |
| IPI0095188 B5DFE9;Q6   | 4.2000  | 7.0000 | 0.0000 | 0.9098 |
| IPI0036443 Q5BJW7;Q5   | 4.5000  | 4.0000 | 0.0000 | 0.9098 |
| IPI0055521 P63159;B4   | 19.1000 | 4.0000 | 0.0000 | 0.9127 |
| IPI0018867 Q5RKH2      | 7.1000  | 3.0000 | 0.0000 | 0.9127 |
| IPI0076463 P52925      | 14.2000 | 3.0000 | 0.0000 | 0.9140 |
| IPI00394502;IPI0036582 | 1.6000  | 2.0000 | 0.0016 | 0.9182 |
| IPI0087082 B0K017      | 6.2000  | 2.0000 | 0.0000 | 0.9184 |
| IPI0036842 Q4V897      | 7.4000  | 2.0000 | 0.0023 | 0.9189 |
| IPI0076536 B4F7C2      | 11.3000 | 5.0000 | 0.0000 | 0.9194 |
| IPI00870042            | 1.3000  | 2.0000 | 0.0011 | 0.9211 |
| IPI0023128 Q08602      | 5.6000  | 3.0000 | 0.0000 | 0.9225 |
| IPI0023141 P70645;A1   | 6.8000  | 3.0000 | 0.0000 | 0.9234 |
| IPI0036509 B5DF11      | 2.1000  | 2.0000 | 0.0000 | 0.9236 |
| IPI0019761 P58200      | 9.9000  | 2.0000 | 0.0000 | 0.9265 |
| IPI0037107 Q5PPN7      | 9.8000  | 3.0000 | 0.0016 | 0.9282 |
| IPI0020871 O88377;Q9   | 6.7000  | 2.0000 | 0.0032 | 0.9298 |
| IPI0020828 Q62786      | 6.6000  | 6.0000 | 0.0000 | 0.9306 |
| IPI0020915 P62824      | 15.4000 | 3.0000 | 0.0000 | 0.9350 |

|                         |         |         |        |        |        |         |
|-------------------------|---------|---------|--------|--------|--------|---------|
| IPI0086959; IPI0086959; | 2.0000  | 0.9000  | 0.0003 | NaN    | 1.0037 | 7.0000  |
| IPI0086956; IPI0086956; | 25.0000 | 36.9000 | 0.0000 | 0.9302 | 0.9442 | 61.0000 |
| IPI0086954; IPI0086954; | 6.0000  | 7.3000  | 0.0000 | 0.8892 | 1.0806 | 4.0000  |
| IPI0086951; IPI0086951; | 20.0000 | 23.2000 | 0.0000 | 1.0941 | 1.0080 | 11.0000 |
| IPI0086949; IPI0086949; | 4.0000  | 24.2000 | 0.0000 | 1.0317 | 1.0399 | 5.0000  |
| IPI0086948; IPI0086948; | 12.0000 | 91.5000 | 0.0000 | 1.1758 | 1.1525 | 27.0000 |
| IPI0086793; IPI0086793; | 23.0000 | 54.1000 | 0.0000 | 0.9914 | 1.1873 | 75.0000 |
| IPI0085835; IPI0085835; | 7.0000  | 27.6000 | 0.0000 | 1.0171 | 1.0209 | 21.0000 |
| IPI0085113; IPI0085113; | 20.0000 | 62.8000 | 0.0000 | 0.9677 | 0.9981 | 30.0000 |
| IPI0085112; IPI0085112; | 2.0000  | 3.9000  | 0.0003 | 0.9360 | 0.8425 | 4.0000  |
| IPI0085110; IPI0085110; | 10.0000 | 38.9000 | 0.0000 | 0.9099 | 0.9309 | 24.0000 |
| IPI0083174; IPI0083174; | 24.0000 | 46.5000 | 0.0000 | 1.0237 | 0.9584 | 39.0000 |
| IPI0082946; IPI0082946; | 6.0000  | 26.7000 | 0.0000 | 1.0753 | 1.1497 | 7.0000  |
| IPI0082945; IPI0082945; | 7.0000  | 6.9000  | 0.0000 | 0.8870 | 0.9534 | 3.0000  |
| IPI0081707; IPI0081707; | 13.0000 | 73.0000 | 0.0000 | 1.0389 | 1.0117 | 8.0000  |
| IPI0079863; IPI0079863; | 7.0000  | 11.0000 | 0.0000 | 1.0800 | 1.0002 | 25.0000 |
| IPI0079862; IPI0079862; | 5.0000  | 19.0000 | 0.0000 | 1.7350 | NaN    | 0.0000  |
| IPI0079861; IPI0079861; | 22.0000 | 34.2000 | 0.0000 | 0.8079 | 0.7795 | 37.0000 |
| IPI0078556; IPI0078556; | 19.0000 | 57.4000 | 0.0000 | 0.9614 | 0.9444 | 49.0000 |
| IPI0078264; IPI0078264; | 8.0000  | 36.6000 | 0.0000 | 1.0341 | 1.0916 | 17.0000 |
| IPI0078261; IPI0078261; | 1.0000  | 2.6000  | 0.0013 | NaN    | NaN    | 1.0000  |
| IPI0078253; IPI0078253; | 2.0000  | 10.9000 | 0.0001 | NaN    | 1.1286 | 2.0000  |
| IPI0078246; IPI0078246; | 3.0000  | 20.5000 | 0.0000 | NaN    | 0.9067 | 2.0000  |
| IPI0078236; IPI0078236; | 2.0000  | 5.2000  | 0.0000 | 0.7181 | 0.9209 | 3.0000  |
| IPI0078228; IPI0078228; | 5.0000  | 9.3000  | 0.0000 | 0.9168 | 0.9684 | 7.0000  |
| IPI0078222; IPI0078222; | 4.0000  | 7.9000  | 0.0000 | 0.9011 | 1.1576 | 4.0000  |
| IPI0078220; IPI0078220; | 27.0000 | 31.6000 | 0.0000 | 0.9802 | 0.9143 | 48.0000 |
| IPI0078216; IPI0078216; | 5.0000  | 1.1000  | 0.0000 | NaN    | NaN    | 1.0000  |
| IPI0078213; IPI0078213; | 6.0000  | 4.9000  | 0.0000 | 0.9301 | NaN    | 0.0000  |
| IPI0078204; IPI0078204; | 12.0000 | 31.4000 | 0.0000 | 1.0718 | 1.1181 | 26.0000 |
| IPI0078200; IPI0078200; | 3.0000  | 3.0000  | 0.0000 | 0.5772 | NaN    | 1.0000  |
| IPI0078194; IPI0078194; | 23.0000 | 60.9000 | 0.0000 | 1.0124 | 1.0555 | 78.0000 |
| IPI0078183; IPI0078183; | 10.0000 | 27.6000 | 0.0000 | 0.8924 | 1.3112 | 20.0000 |
| IPI0078182; IPI0078182; | 3.0000  | 28.7000 | 0.0000 | 1.0745 | 1.1002 | 13.0000 |
| IPI0078174; IPI0078174; | 13.0000 | 8.3000  | 0.0000 | 1.0097 | 0.8601 | 8.0000  |
| IPI0078169; IPI0078169; | 6.0000  | 6.5000  | 0.0000 | 0.6934 | 0.6820 | 3.0000  |
| IPI0078161; IPI0078161; | 3.0000  | 38.0000 | 0.0000 | 1.1614 | 1.1171 | 6.0000  |
| IPI0078158; IPI0078158; | 36.0000 | 47.0000 | 0.0000 | 0.8856 | 0.9559 | 23.0000 |
| IPI0078150; IPI0078150; | 5.0000  | 9.7000  | 0.0000 | 1.3282 | NaN    | 1.0000  |
| IPI0078113; IPI0078113; | 21.0000 | 31.9000 | 0.0000 | 1.0402 | 0.9419 | 44.0000 |
| IPI0078112; IPI0078112; | 21.0000 | 48.5000 | 0.0000 | 1.0026 | 0.9906 | 32.0000 |
| IPI0078098; IPI0078098; | 2.0000  | 4.3000  | 0.0000 | 0.8701 | 0.9090 | 5.0000  |



|                        |         |         |        |        |
|------------------------|---------|---------|--------|--------|
| IPI0036951 Q3KR61;Q5   | 6.3000  | 3.0000  | 0.0000 | 0.9355 |
| IPI00951600;IPI0095224 | 3.9000  | 3.0000  | 0.0000 | 0.9364 |
| IPI00368622;IPI0077642 | 2.5000  | 2.0000  | 0.0003 | 0.9376 |
| IPI00205016            | 17.9000 | 3.0000  | 0.0000 | 0.9380 |
| IPI0021444 Q9QYU4      | 9.9000  | 3.0000  | 0.0003 | 0.9382 |
| IPI0023129 P52759      | 14.6000 | 2.0000  | 0.0003 | 0.9400 |
| IPI00366479            | 8.0000  | 4.0000  | 0.0000 | 0.9408 |
| IPI0020911 Q62812;Q6   | 4.2000  | 8.0000  | 0.0000 | 0.9415 |
| IPI00191103            | 23.7000 | 2.0000  | 0.0000 | 0.9421 |
| IPI0033902 Q9QUH6-1;   | 3.5000  | 3.0000  | 0.0000 | 0.9423 |
| IPI0019545 O08700      | 9.6000  | 6.0000  | 0.0000 | 0.9430 |
| IPI00778413;IPI0094868 | 3.7000  | 3.0000  | 0.0000 | 0.9441 |
| IPI00768171            | 8.3000  | 2.0000  | 0.0000 | 0.9443 |
| IPI0019998 Q9JHW5      | 9.1000  | 2.0000  | 0.0000 | 0.9450 |
| IPI0037361 Q5BJU9      | 1.4000  | 2.0000  | 0.0294 | 0.9452 |
| IPI0094781 B2RYN7      | 8.2000  | 3.0000  | 0.0000 | 0.9462 |
| IPI00947788;IPI0094957 | 1.6000  | 3.0000  | 0.0002 | 0.9472 |
| IPI0037098 C0IMX4;C0   | 6.6000  | 2.0000  | 0.0000 | 0.9472 |
| IPI0077900 Q6DTM3      | 2.1000  | 2.0000  | 0.0000 | 0.9479 |
| IPI0047164 Q641Y0      | 4.1000  | 2.0000  | 0.0068 | 0.9483 |
| IPI0020215 Q6AYK3      | 5.2000  | 3.0000  | 0.0000 | 0.9487 |
| IPI0047025 P31977      | 4.4000  | 3.0000  | 0.0000 | 0.9512 |
| IPI0076835 P62902      | 23.6000 | 4.0000  | 0.0000 | 0.9515 |
| IPI00362186;IPI0076909 | 1.9000  | 2.0000  | 0.0000 | 0.9518 |
| IPI0085835 Q64122;B0   | 17.4000 | 3.0000  | 0.0000 | 0.9527 |
| IPI0094810 P97878      | 8.7000  | 7.0000  | 0.0000 | 0.9577 |
| IPI0042141 Q63945-1;C  | 2.5000  | 2.0000  | 0.0000 | 0.9577 |
| IPI00768509            | 6.5000  | 7.0000  | 0.0000 | 0.9587 |
| IPI0023122 P04906;B6   | 11.4000 | 2.0000  | 0.0000 | 0.9589 |
| IPI0020901 Q9Z1M9      | 3.1000  | 4.0000  | 0.0000 | 0.9593 |
| IPI0032528 P62632      | 12.3000 | 6.0000  | 0.0000 | 0.9593 |
| IPI00360079;IPI0095192 | 3.2000  | 4.0000  | 0.0000 | 0.9609 |
| IPI0021061 O88524      | 1.7000  | 2.0000  | 0.0000 | 0.9614 |
| IPI00569905            | 5.7000  | 4.0000  | 0.0000 | 0.9624 |
| IPI0020794 P30349;Q4   | 8.7000  | 5.0000  | 0.0000 | 0.9630 |
| IPI00359656            | 3.6000  | 3.0000  | 0.0000 | 0.9630 |
| IPI00364715            | 12.6000 | 3.0000  | 0.0002 | 0.9634 |
| IPI0046476 Q0WXX6;Q    | 3.6000  | 2.0000  | 0.0225 | 0.9638 |
| IPI0023091 Q6PDV7      | 9.3000  | 2.0000  | 0.0004 | 0.9642 |
| IPI0047032 Q68FQ7      | 4.9000  | 2.0000  | 0.0000 | 0.9643 |
| IPI00389333;IPI0076864 | 9.6000  | 2.0000  | 0.0005 | 0.9650 |
| IPI0036528 P85972      | 11.4000 | 11.0000 | 0.0000 | 0.9650 |

|                       |         |         |        |        |        |          |
|-----------------------|---------|---------|--------|--------|--------|----------|
| IPI0078092 IPI0078092 | 15.0000 | 64.1000 | 0.0000 | 0.8746 | 0.9486 | 41.0000  |
| IPI0078070 IPI0078070 | 13.0000 | 50.7000 | 0.0000 | 1.0289 | 0.9679 | 24.0000  |
| IPI0078069 IPI0078069 | 2.0000  | 13.3000 | 0.0000 | 1.2469 | NaN    | 1.0000   |
| IPI0078060 IPI0078060 | 34.0000 | 67.0000 | 0.0000 | 0.9898 | 1.0012 | 139.0000 |
| IPI0078053 IPI0078053 | 19.0000 | 64.7000 | 0.0000 | 0.9488 | 0.9626 | 53.0000  |
| IPI0078048 IPI0078048 | 2.0000  | 11.6000 | 0.0000 | 1.0585 | 0.9355 | 3.0000   |
| IPI0078043 IPI0078043 | 26.0000 | 36.1000 | 0.0000 | 1.0337 | 1.0178 | 13.0000  |
| IPI0078041 IPI0078041 | 3.0000  | 15.0000 | 0.0000 | 1.4877 | 1.0520 | 5.0000   |
| IPI0078033 IPI0078033 | 5.0000  | 14.9000 | 0.0000 | 1.1003 | 0.8673 | 7.0000   |
| IPI0078033 IPI0078033 | 16.0000 | 35.6000 | 0.0000 | 0.8952 | 0.8593 | 20.0000  |
| IPI0078023 IPI0078023 | 15.0000 | 59.6000 | 0.0000 | 0.9896 | 1.0290 | 51.0000  |
| IPI0078019 IPI0078019 | 3.0000  | 3.8000  | 0.0000 | 1.1651 | NaN    | 1.0000   |
| IPI0077992 IPI0077992 | 1.0000  | 3.6000  | 0.0001 | 0.9912 | 0.9469 | 2.0000   |
| IPI0077986 IPI0077986 | 2.0000  | 6.7000  | 0.0002 | NaN    | NaN    | 1.0000   |
| IPI0077984 IPI0077984 | 12.0000 | 83.3000 | 0.0000 | 1.0588 | 1.0064 | 3.0000   |
| IPI0077977 IPI0077977 | 16.0000 | 20.6000 | 0.0000 | 0.9248 | 0.8762 | 34.0000  |
| IPI0077965 IPI0077965 | 6.0000  | 25.6000 | 0.0000 | 0.9807 | 1.0828 | 4.0000   |
| IPI0077963 IPI0077963 | 4.0000  | 12.6000 | 0.0000 | 4.3263 | 1.5075 | 2.0000   |
| IPI0077959 IPI0077959 | 17.0000 | 33.2000 | 0.0000 | 1.2536 | 1.3417 | 21.0000  |
| IPI0077958 IPI0077958 | 2.0000  | 0.8000  | 0.0001 | 1.5337 | NaN    | 1.0000   |
| IPI0077952 IPI0077952 | 2.0000  | 8.8000  | 0.0000 | 1.1660 | NaN    | 1.0000   |
| IPI0077948 IPI0077948 | 3.0000  | 41.2000 | 0.0000 | 1.0324 | 1.0542 | 2.0000   |
| IPI0077948 IPI0077948 | 5.0000  | 9.5000  | 0.0000 | 0.9630 | 0.9759 | 8.0000   |
| IPI0077929 IPI0077929 | 1.0000  | 25.2000 | 0.0003 | NaN    | NaN    | 0.0000   |
| IPI0077910 IPI0077910 | 6.0000  | 27.8000 | 0.0000 | 1.1094 | 1.1570 | 3.0000   |
| IPI0077908 IPI0077908 | 13.0000 | 66.0000 | 0.0000 | 1.0018 | 0.9617 | 42.0000  |
| IPI0077905 IPI0077905 | 2.0000  | 12.7000 | 0.0000 | 1.0591 | NaN    | 1.0000   |
| IPI0077899 IPI0077899 | 3.0000  | 6.4000  | 0.0000 | 1.1288 | 1.3185 | 4.0000   |
| IPI0077862 IPI0077862 | 14.0000 | 49.7000 | 0.0000 | 1.0539 | 1.0011 | 48.0000  |
| IPI0077860 IPI0077860 | 2.0000  | 6.2000  | 0.0000 | 1.3444 | 0.6190 | 3.0000   |
| IPI0077855 IPI0077855 | 18.0000 | 25.5000 | 0.0000 | 0.9161 | 1.1250 | 24.0000  |
| IPI0077837 IPI0077837 | 11.0000 | 32.7000 | 0.0000 | 0.5815 | 0.8484 | 10.0000  |
| IPI0077821 IPI0077821 | 8.0000  | 14.1000 | 0.0000 | 0.9987 | 0.8461 | 3.0000   |
| IPI0077819 IPI0077819 | 8.0000  | 8.0000  | 0.0000 | 1.0395 | 1.2185 | 7.0000   |
| IPI0077803 IPI0077803 | 13.0000 | 36.2000 | 0.0000 | 1.1531 | 1.0339 | 31.0000  |
| IPI0077790 IPI0077790 | 2.0000  | 3.4000  | 0.0000 | 1.4386 | NaN    | 1.0000   |
| IPI0077783 IPI0077783 | 4.0000  | 12.7000 | 0.0000 | 1.0178 | 1.0037 | 8.0000   |
| IPI0077770 IPI0077770 | 14.0000 | 35.1000 | 0.0000 | 0.9876 | 1.0916 | 47.0000  |
| IPI0077769 IPI0077769 | 34.0000 | 51.7000 | 0.0000 | 0.9937 | 0.9345 | 88.0000  |
| IPI0077739 IPI0077739 | 10.0000 | 20.8000 | 0.0000 | 0.9906 | 0.9762 | 10.0000  |
| IPI0077734 IPI0077734 | 3.0000  | 41.2000 | 0.0000 | NaN    | 1.0825 | 2.0000   |
| IPI0077717 IPI0077717 | 2.0000  | 7.5000  | 0.0000 | NaN    | NaN    | 0.0000   |

|                        |         |         |        |        |
|------------------------|---------|---------|--------|--------|
| IPI00372685;IPI0095231 | 7.9000  | 3.0000  | 0.0000 | 0.9653 |
| IPI00949573;IPI0038952 | 4.4000  | 3.0000  | 0.0000 | 0.9664 |
| IPI00949250;IPI0091118 | 4.1000  | 2.0000  | 0.0000 | 0.9678 |
| IPI0036267;Q6AY49      | 7.5000  | 3.0000  | 0.0001 | 0.9679 |
| IPI0036787;Q00A22      | 3.8000  | 4.0000  | 0.0000 | 0.9683 |
| IPI0019290;Q5BJM6      | 4.4000  | 3.0000  | 0.0000 | 0.9686 |
| IPI0055530;Q5BJP4      | 8.3000  | 4.0000  | 0.0000 | 0.9687 |
| IPI0076861;Q62671      | 2.2000  | 6.0000  | 0.0000 | 0.9690 |
| IPI0078241;Q5XIT4      | 3.4000  | 2.0000  | 0.0001 | 0.9699 |
| IPI0019825;Q5QD51-1;   | 5.5000  | 9.0000  | 0.0000 | 0.9740 |
| IPI0019255;Q8CGX0;B    | 6.1000  | 3.0000  | 0.0000 | 0.9747 |
| IPI0076466;B1WC50;Q    | 5.7000  | 2.0000  | 0.0000 | 0.9751 |
| IPI0038996;Q5XI01      | 9.5000  | 5.0000  | 0.0000 | 0.9767 |
| IPI00392697;IPI0076536 | 5.4000  | 8.0000  | 0.0000 | 0.9801 |
| IPI0047567;P0C2X9;B4   | 5.7000  | 3.0000  | 0.0000 | 0.9816 |
| IPI00565803;IPI0095149 | 2.4000  | 4.0000  | 0.0000 | 0.9819 |
| IPI0032694;P70540;Q6   | 5.1000  | 3.0000  | 0.0000 | 0.9825 |
| IPI0020507;Q924S1      | 5.0000  | 2.0000  | 0.0000 | 0.9827 |
| IPI00372644;IPI0056799 | 1.9000  | 2.0000  | 0.0022 | 0.9830 |
| IPI00372854            | 10.1000 | 3.0000  | 0.0000 | 0.9830 |
| IPI0021232;P07936      | 46.0000 | 7.0000  | 0.0000 | 0.9832 |
| IPI0023165;Q05175      | 65.2000 | 7.0000  | 0.0000 | 0.9843 |
| IPI0020507;Q924S5      | 1.9000  | 2.0000  | 0.0012 | 0.9856 |
| IPI0094982;B5DF43      | 2.6000  | 2.0000  | 0.0008 | 0.9861 |
| IPI0048068;P30009      | 56.6000 | 10.0000 | 0.0000 | 0.9865 |
| IPI00768856            | 3.9000  | 6.0000  | 0.0000 | 0.9867 |
| IPI0037118;Q5U316      | 13.9000 | 3.0000  | 0.0000 | 0.9870 |
| IPI00202366            | 10.6000 | 2.0000  | 0.0000 | 0.9877 |
| IPI0035990;Q4KM40      | 2.6000  | 3.0000  | 0.0000 | 0.9882 |
| IPI0020179;P05696;B5   | 6.0000  | 3.0000  | 0.0000 | 0.9892 |
| IPI0037350;Q00A23      | 2.3000  | 2.0000  | 0.0000 | 0.9892 |
| IPI00369904;IPI0095158 | 1.2000  | 2.0000  | 0.0001 | 0.9894 |
| IPI0036786;B5DEZ4      | 3.8000  | 4.0000  | 0.0000 | 0.9897 |
| IPI00780335;IPI0036872 | 3.9000  | 2.0000  | 0.0001 | 0.9907 |
| IPI00361726            | 2.9000  | 4.0000  | 0.0000 | 0.9911 |
| IPI00764638;IPI0076299 | 4.2000  | 6.0000  | 0.0000 | 0.9914 |
| IPI0033189;Q80X08      | 3.7000  | 3.0000  | 0.0000 | 0.9917 |
| IPI0036346;Q4V887      | 2.7000  | 2.0000  | 0.0007 | 0.9922 |
| IPI0019848;B5DFK6;Q4   | 1.8000  | 2.0000  | 0.0001 | 0.9925 |
| IPI0028733;Q80U96;Q9   | 5.1000  | 6.0000  | 0.0000 | 0.9934 |
| IPI0036443;B2RZ24      | 4.3000  | 2.0000  | 0.0000 | 0.9935 |
| IPI0019939;P13233      | 5.2000  | 2.0000  | 0.0000 | 0.9947 |

|                       |         |          |        |        |        |          |
|-----------------------|---------|----------|--------|--------|--------|----------|
| IPI0077713;IPI0077713 | 59.0000 | 53.7000  | 0.0000 | 0.9864 | 0.9924 | 214.0000 |
| IPI0077703;IPI0077703 | 7.0000  | 22.3000  | 0.0000 | 1.1191 | 0.9194 | 16.0000  |
| IPI0077692;IPI0077692 | 5.0000  | 14.1000  | 0.0000 | 0.9920 | NaN    | 1.0000   |
| IPI0077690;IPI0077690 | 3.0000  | 5.8000   | 0.0000 | 1.2298 | 0.9459 | 2.0000   |
| IPI0077688;IPI0077688 | 3.0000  | 14.0000  | 0.0000 | 0.8075 | 0.7898 | 6.0000   |
| IPI0077677;IPI0077677 | 10.0000 | 8.4000   | 0.0000 | 1.0473 | 0.9218 | 13.0000  |
| IPI0077661;IPI0077661 | 57.0000 | 32.4000  | 0.0000 | 0.9330 | 1.0180 | 130.0000 |
| IPI0077652;IPI0077652 | 1.0000  | 7.3000   | 0.0000 | NaN    | 1.0112 | 3.0000   |
| IPI0077650;IPI0077650 | 6.0000  | 21.8000  | 0.0000 | 1.0285 | 0.7687 | 6.0000   |
| IPI0076928;IPI0076928 | 5.0000  | 15.7000  | 0.0000 | 1.3328 | 1.6839 | 5.0000   |
| IPI0076926;IPI0076926 | 2.0000  | 13.9000  | 0.0000 | 0.8017 | 0.8711 | 2.0000   |
| IPI0076924;IPI0076924 | 4.0000  | 21.4000  | 0.0000 | 0.8951 | 1.0740 | 4.0000   |
| IPI0076913;IPI0076913 | 2.0000  | 24.5000  | 0.0000 | 1.1563 | 0.9697 | 3.0000   |
| IPI0076911;IPI0076911 | 17.0000 | 16.1000  | 0.0000 | 0.8301 | 0.8410 | 20.0000  |
| IPI0076902;IPI0076902 | 1.0000  | 7.8000   | 0.0010 | 2.7688 | 0.9867 | 5.0000   |
| IPI0076901;IPI0076901 | 2.0000  | 0.9000   | 0.0000 | 1.0814 | NaN    | 0.0000   |
| IPI0076897;IPI0076897 | 5.0000  | 58.1000  | 0.0000 | 0.6447 | 0.5875 | 9.0000   |
| IPI0076892;IPI0076892 | 5.0000  | 5.5000   | 0.0000 | 0.9392 | 0.8378 | 3.0000   |
| IPI0076890;IPI0076890 | 6.0000  | 34.9000  | 0.0000 | 1.1896 | 1.0510 | 11.0000  |
| IPI0076888;IPI0076888 | 1.0000  | 1.2000   | 0.0000 | 1.0644 | 1.0461 | 2.0000   |
| IPI0076875;IPI0076875 | 4.0000  | 41.6000  | 0.0000 | 1.2085 | 0.6310 | 2.0000   |
| IPI0076873;IPI0076873 | 7.0000  | 14.8000  | 0.0000 | 1.0230 | 1.0266 | 12.0000  |
| IPI0076868;IPI0076868 | 4.0000  | 16.8000  | 0.0000 | NaN    | 0.9111 | 2.0000   |
| IPI0076861;IPI0076861 | 3.0000  | 1.5000   | 0.0000 | 0.5749 | 1.0171 | 2.0000   |
| IPI0076850;IPI0076850 | 12.0000 | 23.4000  | 0.0000 | 1.0388 | 1.1868 | 22.0000  |
| IPI0076832;IPI0076832 | 4.0000  | 19.8000  | 0.0000 | 0.9756 | 1.0427 | 8.0000   |
| IPI0076829;IPI0076829 | 8.0000  | 39.3000  | 0.0000 | 0.9454 | 0.9595 | 26.0000  |
| IPI0076829;IPI0076829 | 2.0000  | 8.2000   | 0.0000 | 1.1037 | NaN    | 1.0000   |
| IPI0076824;IPI0076824 | 31.0000 | 71.5000  | 0.0000 | 0.8990 | 0.9388 | 80.0000  |
| IPI0076817;IPI0076817 | 3.0000  | 12.8000  | 0.0000 | NaN    | 1.5402 | 4.0000   |
| IPI0076810;IPI0076810 | 3.0000  | 1.0000   | 0.0000 | 1.2303 | 0.9158 | 3.0000   |
| IPI0076810;IPI0076810 | 2.0000  | 2.3000   | 0.0004 | NaN    | NaN    | 1.0000   |
| IPI0076809;IPI0076809 | 3.0000  | 7.3000   | 0.0000 | 1.0513 | NaN    | 1.0000   |
| IPI0076808;IPI0076808 | 23.0000 | 51.0000  | 0.0000 | 1.0388 | 0.9838 | 64.0000  |
| IPI0076803;IPI0076803 | 2.0000  | 100.0000 | 0.0000 | NaN    | NaN    | 0.0000   |
| IPI0076783;IPI0076783 | 7.0000  | 12.1000  | 0.0000 | 0.9209 | 0.8255 | 5.0000   |
| IPI0076779;IPI0076779 | 17.0000 | 29.5000  | 0.0000 | 1.0210 | 0.9925 | 23.0000  |
| IPI0076775;IPI0076775 | 12.0000 | 15.7000  | 0.0000 | 0.9724 | 0.9636 | 19.0000  |
| IPI0076773;IPI0076773 | 3.0000  | 17.7000  | 0.0000 | 1.0793 | 1.2976 | 3.0000   |
| IPI0076769;IPI0076769 | 13.0000 | 66.9000  | 0.0000 | 0.9499 | 1.0359 | 12.0000  |
| IPI0076761;IPI0076761 | 5.0000  | 10.1000  | 0.0000 | 1.2079 | 0.9637 | 5.0000   |
| IPI0076754;IPI0076754 | 2.0000  | 18.9000  | 0.0000 | 0.9050 | NaN    | 0.0000   |

|             |            |         |         |        |        |
|-------------|------------|---------|---------|--------|--------|
| IPI0020929  | Q9Z270     | 15.7000 | 3.0000  | 0.0000 | 0.9951 |
| IPI0037343  | Q4G079;Q5  | 10.8000 | 2.0000  | 0.0014 | 0.9955 |
| IPI0087022  | B5DFN4     | 21.4000 | 3.0000  | 0.0000 | 0.9960 |
| IPI0021301  | Q6AYH5     | 5.7000  | 2.0000  | 0.0000 | 0.9963 |
| IPI0046492  | Q63803;Q7  | 2.3000  | 2.0000  | 0.0000 | 0.9971 |
| IPI00359981 | IPI0036261 | 14.6000 | 2.0000  | 0.0000 | 0.9976 |
| IPI00362092 |            | 11.9000 | 2.0000  | 0.0202 | 0.9980 |
| IPI00780899 |            | 13.0000 | 4.0000  | 0.0000 | 0.9981 |
| IPI00210111 | Q63560-1;C | 11.8000 | 7.0000  | 0.0000 | 0.9982 |
| IPI0019650  | O08837;B1  | 4.6000  | 4.0000  | 0.0002 | 0.9982 |
| IPI0037281  | Q4KM57     | 7.7000  | 2.0000  | 0.0000 | 0.9985 |
| IPI00390323 |            | 1.3000  | 3.0000  | 0.0000 | 0.9997 |
| IPI00197076 | IPI0076630 | 2.1000  | 2.0000  | 0.0057 | 0.9999 |
| IPI00370981 |            | 0.9000  | 3.0000  | 0.0000 | 1.0003 |
| IPI0037109  | B5DFB6     | 6.4000  | 5.0000  | 0.0000 | 1.0008 |
| IPI0020505  | Q63092     | 11.5000 | 5.0000  | 0.0000 | 1.0016 |
| IPI00949640 | IPI0077970 | 3.4000  | 6.0000  | 0.0000 | 1.0024 |
| IPI00948111 | IPI0037317 | 5.7000  | 3.0000  | 0.0000 | 1.0024 |
| IPI0021015  | Q63570     | 6.2000  | 3.0000  | 0.0000 | 1.0030 |
| IPI0094836  | Q6P9V7;Q6  | 17.7000 | 4.0000  | 0.0000 | 1.0032 |
| IPI00360030 | IPI0056026 | 16.3000 | 13.0000 | 0.0000 | 1.0037 |
| IPI0076904  | O55005     | 3.2000  | 4.0000  | 0.0000 | 1.0044 |
| IPI0086990  | B2RYR3     | 12.0000 | 3.0000  | 0.0000 | 1.0051 |
| IPI00764860 | IPI0078143 | 5.2000  | 9.0000  | 0.0000 | 1.0055 |
| IPI00366761 | IPI0077807 | 7.7000  | 5.0000  | 0.0000 | 1.0058 |
| IPI0094924  | Q5BJR0     | 2.3000  | 2.0000  | 0.0000 | 1.0065 |
| IPI0036115  | Q5U2Q5     | 3.3000  | 3.0000  | 0.0000 | 1.0074 |
| IPI00200367 |            | 24.6000 | 2.0000  | 0.0000 | 1.0078 |
| IPI0082948  | Q63372-2;C | 2.3000  | 3.0000  | 0.0000 | 1.0079 |
| IPI0020058  | Q68SB1-1;C | 12.1000 | 6.0000  | 0.0000 | 1.0080 |
| IPI0038221  | Q7TP40     | 14.8000 | 2.0000  | 0.0000 | 1.0080 |
| IPI0021255  | O88778     | 1.8000  | 6.0000  | 0.0000 | 1.0090 |
| IPI0019275  | B1WC40     | 12.2000 | 2.0000  | 0.0000 | 1.0100 |
| IPI0065008  | Q4AE70-1;C | 2.8000  | 2.0000  | 0.0055 | 1.0105 |
| IPI0076416  | B2RYC9     | 3.1000  | 2.0000  | 0.0108 | 1.0105 |
| IPI00765881 | IPI0036008 | 0.6000  | 3.0000  | 0.0000 | 1.0107 |
| IPI0023192  | P04897;Q4  | 5.4000  | 2.0000  | 0.0000 | 1.0108 |
| IPI0036711  | Q4KLH5     | 7.5000  | 2.0000  | 0.0000 | 1.0109 |
| IPI0020441  | P62501     | 25.2000 | 3.0000  | 0.0000 | 1.0113 |
| IPI0080864  | A0JN30     | 15.4000 | 4.0000  | 0.0000 | 1.0124 |
| IPI0020798  | P62832     | 17.9000 | 2.0000  | 0.0000 | 1.0129 |
| IPI0094896  | Q05096-1;C | 1.7000  | 2.0000  | 0.0003 | 1.0130 |

|            |            |         |         |        |        |        |          |
|------------|------------|---------|---------|--------|--------|--------|----------|
| IPI0076754 | IPI0076754 | 1.0000  | 1.0000  | 0.0010 | 0.9426 | NaN    | 1.0000   |
| IPI0076753 | IPI0076753 | 1.0000  | 1.7000  | 0.0000 | 0.9658 | 0.9409 | 3.0000   |
| IPI0076752 | IPI0076752 | 1.0000  | 3.7000  | 0.0000 | 1.2497 | NaN    | 0.0000   |
| IPI0076743 | IPI0076743 | 2.0000  | 10.4000 | 0.0001 | 0.7052 | NaN    | 1.0000   |
| IPI0076742 | IPI0076742 | 10.0000 | 36.2000 | 0.0000 | 0.4874 | 0.5413 | 19.0000  |
| IPI0076739 | IPI0076739 | 23.0000 | 28.2000 | 0.0000 | 0.9768 | 1.0054 | 31.0000  |
| IPI0076713 | IPI0076713 | 22.0000 | 11.0000 | 0.0000 | 0.9841 | 1.0515 | 16.0000  |
| IPI0076708 | IPI0076708 | 20.0000 | 60.2000 | 0.0000 | 1.0488 | 1.1083 | 69.0000  |
| IPI0076697 | IPI0076697 | 1.0000  | 6.0000  | 0.0004 | NaN    | NaN    | 1.0000   |
| IPI0076695 | IPI0076695 | 19.0000 | 47.7000 | 0.0000 | 1.3600 | 1.6107 | 44.0000  |
| IPI0076684 | IPI0076684 | 1.0000  | 0.9000  | 0.0011 | 1.4491 | NaN    | 1.0000   |
| IPI0076681 | IPI0076681 | 3.0000  | 11.5000 | 0.0000 | 1.1218 | 1.1825 | 8.0000   |
| IPI0076678 | IPI0076678 | 33.0000 | 65.4000 | 0.0000 | 1.0531 | 1.0566 | 117.0000 |
| IPI0076672 | IPI0076672 | 4.0000  | 14.7000 | 0.0000 | 1.1335 | 0.9529 | 11.0000  |
| IPI0076669 | IPI0076669 | 12.0000 | 20.3000 | 0.0000 | 1.0359 | 1.0382 | 21.0000  |
| IPI0076666 | IPI0076666 | 3.0000  | 8.1000  | 0.0000 | 0.8670 | 0.9315 | 3.0000   |
| IPI0076665 | IPI0076665 | 3.0000  | 18.6000 | 0.0000 | NaN    | 1.1419 | 2.0000   |
| IPI0076664 | IPI0076664 | 2.0000  | 4.1000  | 0.0000 | NaN    | NaN    | 1.0000   |
| IPI0076658 | IPI0076658 | 1.0000  | 3.0000  | 0.0000 | 0.9545 | NaN    | 0.0000   |
| IPI0076657 | IPI0076657 | 16.0000 | 28.3000 | 0.0000 | 0.9051 | 0.8887 | 23.0000  |
| IPI0076656 | IPI0076656 | 1.0000  | 3.8000  | 0.0000 | 1.0144 | NaN    | 0.0000   |
| IPI0076649 | IPI0076649 | 3.0000  | 1.8000  | 0.0000 | NaN    | NaN    | 1.0000   |
| IPI0076648 | IPI0076648 | 1.0000  | 8.1000  | 0.0009 | NaN    | NaN    | 1.0000   |
| IPI0076646 | IPI0076646 | 15.0000 | 62.7000 | 0.0000 | 1.0182 | 1.0066 | 19.0000  |
| IPI0076640 | IPI0076640 | 8.0000  | 14.4000 | 0.0000 | 1.0507 | 1.0669 | 7.0000   |
| IPI0076629 | IPI0076629 | 3.0000  | 16.0000 | 0.0000 | NaN    | 0.8424 | 3.0000   |
| IPI0076627 | IPI0076627 | 11.0000 | 61.1000 | 0.0000 | 0.9888 | 1.1093 | 29.0000  |
| IPI0076627 | IPI0076627 | 19.0000 | 38.2000 | 0.0000 | 1.6340 | 0.9681 | 13.0000  |
| IPI0076621 | IPI0076621 | 2.0000  | 1.7000  | 0.0000 | 1.2261 | NaN    | 1.0000   |
| IPI0076621 | IPI0076621 | 10.0000 | 26.7000 | 0.0000 | 1.3225 | 1.0305 | 12.0000  |
| IPI0076610 | IPI0076610 | 6.0000  | 19.8000 | 0.0000 | 0.9480 | 1.0934 | 6.0000   |
| IPI0076601 | IPI0076601 | 17.0000 | 72.3000 | 0.0000 | 0.9349 | 0.9095 | 28.0000  |
| IPI0076599 | IPI0076599 | 4.0000  | 12.5000 | 0.0000 | NaN    | 1.5733 | 6.0000   |
| IPI0076596 | IPI0076596 | 10.0000 | 14.5000 | 0.0000 | 0.8894 | 0.9724 | 15.0000  |
| IPI0076595 | IPI0076595 | 2.0000  | 9.0000  | 0.0000 | 1.7528 | 1.1209 | 3.0000   |
| IPI0076588 | IPI0076588 | 4.0000  | 8.9000  | 0.0000 | 0.8724 | 0.9264 | 5.0000   |
| IPI0076588 | IPI0076588 | 3.0000  | 1.0000  | 0.0000 | 0.6472 | NaN    | 0.0000   |
| IPI0076584 | IPI0076584 | 22.0000 | 58.1000 | 0.0000 | 0.9312 | 1.0179 | 52.0000  |
| IPI0076575 | IPI0076575 | 8.0000  | 14.5000 | 0.0000 | 1.0321 | 1.0542 | 7.0000   |
| IPI0076569 | IPI0076569 | 2.0000  | 3.1000  | 0.0002 | NaN    | 1.3825 | 2.0000   |
| IPI0076568 | IPI0076568 | 2.0000  | 5.3000  | 0.0000 | 1.6236 | NaN    | 0.0000   |
| IPI0076550 | IPI0076550 | 3.0000  | 20.8000 | 0.0000 | 0.7352 | 0.8674 | 4.0000   |

|                        |         |         |        |        |
|------------------------|---------|---------|--------|--------|
| IPI00373682;IPI0094889 | 3.4000  | 3.0000  | 0.0000 | 1.0130 |
| IPI0019427;Q3ZU82      | 8.0000  | 5.0000  | 0.0000 | 1.0134 |
| IPI0023085;P29410-1;F  | 13.4000 | 3.0000  | 0.0000 | 1.0137 |
| IPI0076605;P83883;B2F  | 13.8000 | 2.0000  | 0.0000 | 1.0144 |
| IPI0037282;Q0ZFS8      | 17.7000 | 3.0000  | 0.0000 | 1.0145 |
| IPI0037245;B5DFK1;Q5   | 2.7000  | 4.0000  | 0.0000 | 1.0147 |
| IPI0087017;B3GNI6-2;E  | 10.2000 | 4.0000  | 0.0000 | 1.0158 |
| IPI0020914;Q62824      | 5.6000  | 5.0000  | 0.0000 | 1.0161 |
| IPI0019930;P62815      | 6.3000  | 3.0000  | 0.0000 | 1.0163 |
| IPI0023141;P70615      | 12.4000 | 7.0000  | 0.0000 | 1.0166 |
| IPI00372684;IPI0078158 | 4.6000  | 7.0000  | 0.0000 | 1.0167 |
| IPI0041737;Q6PW34;Q    | 2.6000  | 3.0000  | 0.0004 | 1.0170 |
| IPI00392467;IPI0037310 | 5.3000  | 8.0000  | 0.0000 | 1.0171 |
| IPI0095120;B2RYNO      | 3.4000  | 2.0000  | 0.0000 | 1.0186 |
| IPI0037340;B5DFN2      | 3.2000  | 2.0000  | 0.0042 | 1.0193 |
| IPI0020928;Q62876      | 9.4000  | 2.0000  | 0.0000 | 1.0207 |
| IPI00679182;IPI0077703 | 2.9000  | 3.0000  | 0.0000 | 1.0207 |
| IPI00369227;IPI0076532 | 4.9000  | 5.0000  | 0.0000 | 1.0209 |
| IPI0055694;P0C1X8      | 5.0000  | 4.0000  | 0.0000 | 1.0210 |
| IPI0046464;Q6AY97      | 8.4000  | 3.0000  | 0.0000 | 1.0216 |
| IPI00768734            | 3.3000  | 2.0000  | 0.0000 | 1.0219 |
| IPI0056488;P24049;Q7   | 10.1000 | 2.0000  | 0.0000 | 1.0228 |
| IPI00778558            | 4.2000  | 5.0000  | 0.0000 | 1.0228 |
| IPI0055733;B2RYP6      | 11.7000 | 4.0000  | 0.0000 | 1.0230 |
| IPI0056401;Q5BJT4      | 7.8000  | 2.0000  | 0.0000 | 1.0230 |
| IPI0021363;Q812D1-1;C  | 8.1000  | 4.0000  | 0.0000 | 1.0233 |
| IPI0019836;Q99N27      | 6.3000  | 3.0000  | 0.0000 | 1.0234 |
| IPI0023196;P80254      | 16.1000 | 2.0000  | 0.0061 | 1.0243 |
| IPI0036799;P0CB49      | 3.0000  | 4.0000  | 0.0000 | 1.0247 |
| IPI00768472            | 5.6000  | 10.0000 | 0.0000 | 1.0249 |
| IPI0036623;Q5RKH6      | 3.2000  | 2.0000  | 0.0000 | 1.0250 |
| IPI00764098            | 5.4000  | 2.0000  | 0.0010 | 1.0253 |
| IPI0095134;O35346;Q6   | 1.8000  | 2.0000  | 0.0061 | 1.0258 |
| IPI0082945;Q07310-1;C  | 2.9000  | 4.0000  | 0.0000 | 1.0262 |
| IPI0021523;Q9QZR6-1;F  | 4.5000  | 3.0000  | 0.0000 | 1.0269 |
| IPI0076748;B2RZ41;Q5   | 9.3000  | 2.0000  | 0.0163 | 1.0273 |
| IPI0020778;Q9Z0J8      | 5.2000  | 2.0000  | 0.0000 | 1.0276 |
| IPI0020142;Q09137-1;C  | 3.3000  | 2.0000  | 0.0000 | 1.0278 |
| IPI0033915;Q62871-1;C  | 11.0000 | 5.0000  | 0.0000 | 1.0279 |
| IPI0089618;Q08877-12;F | 5.4000  | 5.0000  | 0.0000 | 1.0279 |
| IPI00780987;IPI0077796 | 2.5000  | 2.0000  | 0.0002 | 1.0281 |
| IPI0040068;Q10728-1;C  | 5.7000  | 6.0000  | 0.0000 | 1.0285 |

|                         |         |         |        |        |        |         |
|-------------------------|---------|---------|--------|--------|--------|---------|
| IPI0076548; IPI0076548: | 2.0000  | 3.3000  | 0.0000 | 0.9102 | NaN    | 1.0000  |
| IPI0076536; IPI0076536: | 43.0000 | 86.7000 | 0.0000 | 0.9768 | 0.9763 | 59.0000 |
| IPI0076523; IPI0076523: | 11.0000 | 9.7000  | 0.0000 | 1.3741 | 0.9579 | 10.0000 |
| IPI0076522; IPI0076522: | 17.0000 | 64.5000 | 0.0000 | 0.9435 | 0.9872 | 68.0000 |
| IPI0076520; IPI0076520: | 1.0000  | 4.3000  | 0.0001 | NaN    | NaN    | 0.0000  |
| IPI0076518; IPI0076518: | 4.0000  | 13.1000 | 0.0000 | 1.6436 | 1.0406 | 4.0000  |
| IPI0076499; IPI0076499: | 4.0000  | 49.5000 | 0.0000 | 1.0278 | 1.0857 | 9.0000  |
| IPI0076495; IPI0076495: | 3.0000  | 42.2000 | 0.0000 | 0.2798 | 0.1641 | 5.0000  |
| IPI0076488; IPI0076488: | 2.0000  | 0.4000  | 0.0003 | 0.9356 | 0.9151 | 2.0000  |
| IPI0076486; IPI0076486: | 2.0000  | 1.5000  | 0.0001 | NaN    | 0.6306 | 2.0000  |
| IPI0076469; IPI0076469: | 13.0000 | 49.8000 | 0.0000 | 0.9660 | 0.9648 | 48.0000 |
| IPI0076468; IPI0076468: | 7.0000  | 54.3000 | 0.0000 | 1.0513 | 1.0900 | 7.0000  |
| IPI0076466; IPI0076466: | 3.0000  | 5.4000  | 0.0000 | 0.9539 | 0.9886 | 11.0000 |
| IPI0076463; IPI0076463: | 17.0000 | 21.4000 | 0.0000 | 0.8994 | 0.9480 | 14.0000 |
| IPI0076455; IPI0076455: | 5.0000  | 5.8000  | 0.0000 | 0.9090 | 0.9750 | 3.0000  |
| IPI0076453; IPI0076453: | 15.0000 | 57.7000 | 0.0000 | 0.9778 | 0.9287 | 28.0000 |
| IPI0076447; IPI0076447: | 8.0000  | 18.2000 | 0.0000 | 1.2337 | 1.3349 | 2.0000  |
| IPI0076444; IPI0076444: | 2.0000  | 15.8000 | 0.0000 | NaN    | 1.0498 | 6.0000  |
| IPI0076443; IPI0076443: | 12.0000 | 11.5000 | 0.0000 | 1.1875 | 1.0986 | 13.0000 |
| IPI0076439; IPI0076439: | 2.0000  | 9.7000  | 0.0000 | 1.0389 | 0.9302 | 2.0000  |
| IPI0076432; IPI0076432: | 3.0000  | 1.1000  | 0.0000 | 1.7493 | 2.3263 | 2.0000  |
| IPI0076431; IPI0076431: | 18.0000 | 11.4000 | 0.0000 | 0.9893 | 0.8060 | 13.0000 |
| IPI0076423; IPI0076423: | 2.0000  | 13.4000 | 0.0000 | 0.8439 | 0.8720 | 4.0000  |
| IPI0076416; IPI0076416: | 17.0000 | 53.8000 | 0.0000 | 0.8507 | 0.9496 | 20.0000 |
| IPI0076416; IPI0076416: | 7.0000  | 3.8000  | 0.0000 | NaN    | NaN    | 0.0000  |
| IPI0076415; IPI0076415: | 1.0000  | 1.6000  | 0.0010 | NaN    | NaN    | 0.0000  |
| IPI0076409; IPI0076409: | 5.0000  | 20.0000 | 0.0000 | 1.1146 | 1.0758 | 7.0000  |
| IPI0076406; IPI0076406: | 29.0000 | 49.5000 | 0.0000 | 1.0167 | 1.0287 | 65.0000 |
| IPI0076402; IPI0076402: | 8.0000  | 11.9000 | 0.0000 | 0.8651 | 1.5264 | 5.0000  |
| IPI0076397; IPI0076397: | 5.0000  | 23.1000 | 0.0000 | 1.0093 | 0.8511 | 7.0000  |
| IPI0076392; IPI0076392: | 3.0000  | 50.5000 | 0.0000 | 1.1059 | 1.0483 | 2.0000  |
| IPI0076387; IPI0076387: | 3.0000  | 25.0000 | 0.0000 | 0.8890 | NaN    | 0.0000  |
| IPI0076382; IPI0076382: | 13.0000 | 11.0000 | 0.0000 | 0.9637 | 0.9396 | 25.0000 |
| IPI0076380; IPI0076380: | 23.0000 | 23.3000 | 0.0000 | 1.0168 | 0.9905 | 50.0000 |
| IPI0076374; IPI0076374: | 1.0000  | 3.5000  | 0.0000 | NaN    | 1.1930 | 3.0000  |
| IPI0076362; IPI0076362: | 5.0000  | 20.0000 | 0.0000 | 0.8153 | 0.9783 | 3.0000  |
| IPI0076361; IPI0076361: | 1.0000  | 15.7000 | 0.0000 | NaN    | NaN    | 1.0000  |
| IPI0076358; IPI0076358: | 22.0000 | 48.6000 | 0.0000 | 1.0759 | 1.0607 | 81.0000 |
| IPI0076355; IPI0076355: | 14.0000 | 7.1000  | 0.0000 | 0.9777 | 0.9138 | 17.0000 |
| IPI0076348; IPI0076348: | 2.0000  | 21.5000 | 0.0000 | 0.7958 | NaN    | 0.0000  |
| IPI0076342; IPI0076342: | 16.0000 | 49.1000 | 0.0000 | 1.0341 | 0.9656 | 26.0000 |
| IPI0076342; IPI0076342: | 1.0000  | 4.0000  | 0.0000 | NaN    | NaN    | 1.0000  |

|                        |         |         |        |        |
|------------------------|---------|---------|--------|--------|
| IPI00364191            | 1.8000  | 2.0000  | 0.0081 | 1.0287 |
| IPI0032769;P32089      | 6.4000  | 2.0000  | 0.0011 | 1.0290 |
| IPI00563574;IPI0077919 | 6.6000  | 9.0000  | 0.0000 | 1.0292 |
| IPI0041773;Q6MG48      | 3.9000  | 6.0000  | 0.0000 | 1.0297 |
| IPI0020087;Q920R4      | 3.5000  | 4.0000  | 0.0000 | 1.0300 |
| IPI00364420            | 6.0000  | 4.0000  | 0.0000 | 1.0305 |
| IPI0020904;Q9Z1N3      | 0.8000  | 2.0000  | 0.0000 | 1.0312 |
| IPI0018885;P70478      | 7.2000  | 15.0000 | 0.0000 | 1.0314 |
| IPI0037341;B2GV15;Q9   | 5.8000  | 3.0000  | 0.0001 | 1.0316 |
| IPI0019034;Q9EQR2;Q9   | 7.6000  | 4.0000  | 0.0000 | 1.0319 |
| IPI0036485;Q5U301      | 3.0000  | 2.0000  | 0.0000 | 1.0320 |
| IPI00365665            | 5.6000  | 5.0000  | 0.0000 | 1.0322 |
| IPI0023084;P62775      | 21.2000 | 2.0000  | 0.0000 | 1.0324 |
| IPI0036680;B2GUU1;Q9   | 9.4000  | 5.0000  | 0.0000 | 1.0337 |
| IPI0095000;Q5M868-1;Q  | 3.1000  | 2.0000  | 0.0000 | 1.0339 |
| IPI00371510;IPI0095041 | 4.5000  | 3.0000  | 0.0000 | 1.0340 |
| IPI0036257;Q3KRC3      | 3.3000  | 2.0000  | 0.0007 | 1.0348 |
| IPI0021265;P62076      | 28.4000 | 2.0000  | 0.0000 | 1.0349 |
| IPI0021193;P23565      | 23.1000 | 13.0000 | 0.0000 | 1.0350 |
| IPI0020809;Q91XR8;Q7   | 8.3000  | 2.0000  | 0.0000 | 1.0353 |
| IPI00367085            | 7.7000  | 3.0000  | 0.0000 | 1.0353 |
| IPI0032560;P12839      | 7.2000  | 7.0000  | 0.0000 | 1.0355 |
| IPI0021222;P15791-1;P  | 9.2000  | 5.0000  | 0.0000 | 1.0356 |
| IPI0023195;P47860;C7   | 5.2000  | 3.0000  | 0.0000 | 1.0358 |
| IPI0038840;Q9WUI9      | 3.4000  | 4.0000  | 0.0000 | 1.0361 |
| IPI0077899;Q80WE1-1;   | 3.9000  | 3.0000  | 0.0002 | 1.0363 |
| IPI0020662;P06761      | 21.9000 | 16.0000 | 0.0000 | 1.0374 |
| IPI0035844;Q5BK63;B5   | 5.3000  | 2.0000  | 0.0001 | 1.0377 |
| IPI00367304;IPI0077993 | 2.3000  | 2.0000  | 0.0000 | 1.0384 |
| IPI0019456;Q566E4;Q8   | 6.5000  | 4.0000  | 0.0000 | 1.0385 |
| IPI0094919;Q62839      | 4.9000  | 5.0000  | 0.0000 | 1.0389 |
| IPI0019664;O70257      | 21.8000 | 4.0000  | 0.0000 | 1.0393 |
| IPI0020184;B4F774      | 5.7000  | 2.0000  | 0.0001 | 1.0394 |
| IPI0039407;P62912      | 27.0000 | 4.0000  | 0.0000 | 1.0401 |
| IPI0020983;Q920Q0      | 25.6000 | 8.0000  | 0.0000 | 1.0410 |
| IPI00778181;IPI0047687 | 2.1000  | 6.0000  | 0.0000 | 1.0411 |
| IPI0047190;Q66HP7;Q9   | 6.9000  | 4.0000  | 0.0000 | 1.0416 |
| IPI00869949            | 18.9000 | 4.0000  | 0.0000 | 1.0416 |
| IPI0088240;Q68G41;Q6   | 5.9000  | 2.0000  | 0.0144 | 1.0416 |
| IPI0056097;Q5M9G3;A9   | 9.8000  | 6.0000  | 0.0000 | 1.0420 |
| IPI0019165;Q6AY24      | 5.8000  | 2.0000  | 0.0000 | 1.0421 |
| IPI0056397;P41499-1;P  | 13.1000 | 8.0000  | 0.0000 | 1.0423 |

|                        |         |         |        |        |        |          |
|------------------------|---------|---------|--------|--------|--------|----------|
| IPI0076340;IPI0076340; | 1.0000  | 14.0000 | 0.0001 | NaN    | 0.5120 | 2.0000   |
| IPI0076331;IPI0076331; | 1.0000  | 3.6000  | 0.0000 | NaN    | NaN    | 0.0000   |
| IPI0076330;IPI0076330; | 6.0000  | 14.9000 | 0.0000 | 0.9110 | 1.2590 | 8.0000   |
| IPI0076327;IPI0076327; | 8.0000  | 20.6000 | 0.0000 | 0.8497 | 0.7299 | 6.0000   |
| IPI0076326;IPI0076326; | 9.0000  | 53.1000 | 0.0000 | 1.0215 | 1.1022 | 25.0000  |
| IPI0076324;IPI0076324; | 1.0000  | 11.3000 | 0.0000 | NaN    | NaN    | 1.0000   |
| IPI0076321;IPI0076321; | 3.0000  | 20.3000 | 0.0000 | 0.8528 | 0.8604 | 5.0000   |
| IPI0076305;IPI0076305; | 19.0000 | 38.8000 | 0.0000 | 0.9882 | 0.9638 | 34.0000  |
| IPI0076305;IPI0076305; | 2.0000  | 2.9000  | 0.0004 | 1.1424 | 1.0526 | 3.0000   |
| IPI0076014;IPI0076014; | 8.0000  | 41.4000 | 0.0000 | 0.9897 | 0.9972 | 19.0000  |
| IPI0076013;IPI0076013; | 2.0000  | 15.4000 | 0.0000 | 0.9398 | NaN    | 1.0000   |
| IPI0076013;IPI0076013; | 4.0000  | 8.8000  | 0.0000 | 0.8140 | NaN    | 1.0000   |
| IPI0076012;IPI0076012; | 33.0000 | 96.3000 | 0.0000 | NaN    | NaN    | 1.0000   |
| IPI0075846;IPI0075846; | 15.0000 | 24.5000 | 0.0000 | 0.9856 | 1.0486 | 18.0000  |
| IPI0073473;IPI0073473; | 3.0000  | 6.7000  | 0.0000 | 0.9642 | 1.0346 | 8.0000   |
| IPI0073468;IPI0073468; | 6.0000  | 19.4000 | 0.0000 | 0.9515 | 0.9722 | 30.0000  |
| IPI0073466;IPI0073466; | 14.0000 | 55.4000 | 0.0000 | 1.0623 | 0.9889 | 31.0000  |
| IPI0073462;IPI0073462; | 2.0000  | 9.7000  | 0.0002 | NaN    | NaN    | 0.0000   |
| IPI0067921;IPI0067921; | 2.0000  | 5.6000  | 0.0000 | NaN    | 0.8072 | 4.0000   |
| IPI0067920;IPI0067920; | 7.0000  | 86.5000 | 0.0000 | 1.1213 | 1.2892 | 12.0000  |
| IPI0067918;IPI0067918; | 1.0000  | 1.1000  | 0.0000 | 1.0573 | 1.0390 | 4.0000   |
| IPI0065639;IPI0065639; | 3.0000  | 9.4000  | 0.0000 | 1.1494 | 1.2013 | 9.0000   |
| IPI0065638;IPI0065638; | 16.0000 | 50.6000 | 0.0000 | 0.8865 | 0.9437 | 19.0000  |
| IPI0065634;IPI0065634; | 14.0000 | 50.0000 | 0.0000 | 1.0046 | 0.9935 | 33.0000  |
| IPI0065532;IPI0065532; | 6.0000  | 31.8000 | 0.0000 | 1.0226 | 0.9545 | 17.0000  |
| IPI0065530;IPI0065530; | 16.0000 | 87.9000 | 0.0000 | 1.0202 | 1.0104 | 52.0000  |
| IPI0065528;IPI0065528; | 31.0000 | 43.2000 | 0.0000 | 0.9867 | 0.9922 | 65.0000  |
| IPI0065525;IPI0065525; | 49.0000 | 82.2000 | 0.0000 | 1.0129 | 0.9890 | 480.0000 |
| IPI0065524;IPI0065524; | 12.0000 | 10.6000 | 0.0000 | 0.9805 | 0.9587 | 7.0000   |
| IPI0065445;IPI0065445; | 8.0000  | 27.6000 | 0.0000 | 0.9447 | 0.9356 | 11.0000  |
| IPI0065444;IPI0065444; | 4.0000  | 14.8000 | 0.0000 | 0.8339 | 0.9960 | 8.0000   |
| IPI0065010;IPI0065010; | 7.0000  | 13.6000 | 0.0000 | 1.0508 | 0.9118 | 9.0000   |
| IPI0065009;IPI0065009; | 9.0000  | 38.0000 | 0.0000 | 0.9968 | 0.9269 | 19.0000  |
| IPI0065008;IPI0065008; | 2.0000  | 7.1000  | 0.0000 | NaN    | 0.9297 | 3.0000   |
| IPI0065008;IPI0065008; | 5.0000  | 13.8000 | 0.0000 | 1.0815 | 1.1084 | 12.0000  |
| IPI0062707;IPI0062707; | 1.0000  | 11.5000 | 0.0001 | NaN    | NaN    | 0.0000   |
| IPI0062706;IPI0062706; | 48.0000 | 55.9000 | 0.0000 | 1.0833 | 0.9631 | 134.0000 |
| IPI0060817;IPI0060817; | 14.0000 | 66.9000 | 0.0000 | 0.9900 | 0.9974 | 39.0000  |
| IPI0060814;IPI0060814; | 17.0000 | 57.0000 | 0.0000 | 1.0222 | 1.0063 | 57.0000  |
| IPI0060813;IPI0060813; | 4.0000  | 30.3000 | 0.0000 | 1.0210 | 1.1050 | 7.0000   |
| IPI0056981;IPI0056981; | 1.0000  | 1.5000  | 0.0000 | 1.2889 | 0.9879 | 2.0000   |
| IPI0056940;IPI0056940; | 2.0000  | 1.8000  | 0.0000 | NaN    | 0.6691 | 4.0000   |

|                        |         |         |        |        |
|------------------------|---------|---------|--------|--------|
| IPI0019150;P34064;Q6   | 23.7000 | 5.0000  | 0.0000 | 1.0427 |
| IPI0036554;Q6P6R2      | 9.0000  | 4.0000  | 0.0000 | 1.0432 |
| IPI0037208;Q5PPJ9      | 4.0000  | 2.0000  | 0.0001 | 1.0433 |
| IPI00768065;IPI0036119 | 1.9000  | 3.0000  | 0.0000 | 1.0440 |
| IPI0039397;Q5M7W5-1    | 24.0000 | 21.0000 | 0.0000 | 1.0446 |
| IPI0020820;Q91XU8      | 4.5000  | 2.0000  | 0.0000 | 1.0455 |
| IPI0020847;O88321;Q9   | 6.8000  | 3.0000  | 0.0000 | 1.0455 |
| IPI0032427;O54921      | 3.1000  | 3.0000  | 0.0000 | 1.0456 |
| IPI0038785;Q05140-1;C  | 6.5000  | 6.0000  | 0.0000 | 1.0458 |
| IPI00782615;IPI0037270 | 4.0000  | 2.0000  | 0.0000 | 1.0462 |
| IPI0021161;Q64303      | 9.4000  | 4.0000  | 0.0000 | 1.0463 |
| IPI00565184;IPI0035931 | 4.2000  | 4.0000  | 0.0000 | 1.0463 |
| IPI00367251            | 10.6000 | 3.0000  | 0.0000 | 1.0465 |
| IPI00358537            | 6.5000  | 4.0000  | 0.0000 | 1.0469 |
| IPI00368779;IPI0094791 | 3.2000  | 2.0000  | 0.0031 | 1.0469 |
| IPI0020718;P52555      | 10.8000 | 3.0000  | 0.0000 | 1.0472 |
| IPI0036651;Q4V8C2      | 4.8000  | 3.0000  | 0.0000 | 1.0472 |
| IPI00360418;IPI0039386 | 9.0000  | 8.0000  | 0.0000 | 1.0475 |
| IPI00766273            | 26.8000 | 8.0000  | 0.0000 | 1.0475 |
| IPI0020413;Q9WUL0      | 6.0000  | 5.0000  | 0.0000 | 1.0479 |
| IPI0038975;P06766;Q6   | 5.7000  | 2.0000  | 0.0019 | 1.0483 |
| IPI0036968;P62966      | 36.5000 | 5.0000  | 0.0000 | 1.0485 |
| IPI00949252;IPI0087022 | 3.6000  | 2.0000  | 0.0000 | 1.0485 |
| IPI0032576;P63012      | 16.4000 | 3.0000  | 0.0000 | 1.0488 |
| IPI0020934;Q4V8E1      | 5.7000  | 3.0000  | 0.0000 | 1.0501 |
| IPI0038224;Q7TP73;B1   | 2.0000  | 3.0000  | 0.0000 | 1.0501 |
| IPI0020484;P59215-2;F  | 17.2000 | 6.0000  | 0.0000 | 1.0509 |
| IPI0046453;Q6AXS6      | 3.3000  | 6.0000  | 0.0000 | 1.0510 |
| IPI0036596;Q4KLZ3      | 6.4000  | 2.0000  | 0.0000 | 1.0515 |
| IPI0035996;O08778      | 2.4000  | 5.0000  | 0.0000 | 1.0516 |
| IPI00203851;IPI0094926 | 2.1000  | 2.0000  | 0.0000 | 1.0517 |
| IPI00769110;IPI0076482 | 12.0000 | 16.0000 | 0.0000 | 1.0521 |
| IPI0036599;Q6AXS3      | 7.4000  | 3.0000  | 0.0000 | 1.0523 |
| IPI00765754;IPI0077948 | 11.4000 | 8.0000  | 0.0000 | 1.0524 |
| IPI0037270;Q3B8Q9;Q7   | 10.9000 | 11.0000 | 0.0000 | 1.0527 |
| IPI00371470;IPI0094804 | 9.2000  | 7.0000  | 0.0000 | 1.0533 |
| IPI0078220;Q62717      | 5.6000  | 6.0000  | 0.0000 | 1.0536 |
| IPI00366048            | 6.8000  | 2.0000  | 0.0000 | 1.0536 |
| IPI0095469;C9WPN6;C    | 5.5000  | 3.0000  | 0.0003 | 1.0538 |
| IPI0023108;P21708-2;F  | 5.9000  | 2.0000  | 0.0000 | 1.0539 |
| IPI0039287;Q7TT49      | 6.9000  | 12.0000 | 0.0000 | 1.0542 |
| IPI0056609;P48450      | 4.6000  | 3.0000  | 0.0000 | 1.0543 |

|                         |         |         |        |        |        |         |
|-------------------------|---------|---------|--------|--------|--------|---------|
| IPI0056935; IPI0056935; | 7.0000  | 20.3000 | 0.0000 | 1.0856 | 0.9392 | 11.0000 |
| IPI0056914; IPI0056914; | 3.0000  | 11.4000 | 0.0000 | 0.9436 | 1.0647 | 6.0000  |
| IPI0056896; IPI0056896; | 2.0000  | 12.4000 | 0.0000 | 1.2392 | NaN    | 0.0000  |
| IPI0056878; IPI0056878; | 2.0000  | 4.1000  | 0.0000 | 0.8422 | NaN    | 1.0000  |
| IPI0056869; IPI0056869; | 14.0000 | 45.4000 | 0.0000 | 0.9715 | 1.1053 | 36.0000 |
| IPI0056851; IPI0056851; | 3.0000  | 19.9000 | 0.0000 | 1.0572 | 0.9979 | 2.0000  |
| IPI0056836; IPI0056836; | 15.0000 | 75.8000 | 0.0000 | 0.9695 | 1.0622 | 40.0000 |
| IPI0056822; IPI0056822; | 12.0000 | 44.2000 | 0.0000 | 1.0286 | 1.0820 | 24.0000 |
| IPI0056810; IPI0056810; | 3.0000  | 78.3000 | 0.0000 | 0.8753 | 0.7505 | 3.0000  |
| IPI0056798; IPI0056798; | 1.0000  | 17.8000 | 0.0001 | 0.8969 | 0.8931 | 5.0000  |
| IPI0056794; IPI0056794; | 27.0000 | 16.6000 | 0.0000 | 0.9624 | 0.8953 | 22.0000 |
| IPI0056791; IPI0056791; | 37.0000 | 49.3000 | 0.0000 | 0.9873 | 0.9478 | 51.0000 |
| IPI0056782; IPI0056782; | 9.0000  | 32.4000 | 0.0000 | 1.0588 | 1.1198 | 15.0000 |
| IPI0056776; IPI0056776; | 1.0000  | 5.4000  | 0.0001 | NaN    | NaN    | 0.0000  |
| IPI0056766; IPI0056766; | 18.0000 | 55.7000 | 0.0000 | NaN    | NaN    | 1.3432  |
| IPI0056737; IPI0056737; | 3.0000  | 16.0000 | 0.0000 | 1.6036 | 1.0258 | 4.0000  |
| IPI0056703; IPI0056703; | 4.0000  | 29.4000 | 0.0000 | NaN    | NaN    | 0.5533  |
| IPI0056698; IPI0056698; | 7.0000  | 14.1000 | 0.0000 | 0.9693 | 1.0122 | 9.0000  |
| IPI0056688; IPI0056688; | 2.0000  | 3.8000  | 0.0000 | NaN    | NaN    | 1.0000  |
| IPI0056681; IPI0056681; | 4.0000  | 12.2000 | 0.0000 | 1.0917 | 1.0521 | 14.0000 |
| IPI0056667; IPI0056667; | 8.0000  | 29.4000 | 0.0000 | 0.8958 | 0.7950 | 10.0000 |
| IPI0056663; IPI0056663; | 4.0000  | 7.6000  | 0.0000 | 0.9788 | 1.0331 | 2.0000  |
| IPI0056628; IPI0056628; | 5.0000  | 17.1000 | 0.0000 | 0.8402 | 0.6955 | 2.0000  |
| IPI0056612; IPI0056612; | 8.0000  | 13.4000 | 0.0000 | NaN    | NaN    | 0.0000  |
| IPI0056609; IPI0056609; | 14.0000 | 24.7000 | 0.0000 | 0.9792 | 0.8619 | 10.0000 |
| IPI0056590; IPI0056590; | 11.0000 | 41.7000 | 0.0000 | 1.0799 | 1.0639 | 14.0000 |
| IPI0056580; IPI0056580; | 3.0000  | 2.8000  | 0.0000 | NaN    | NaN    | 0.0000  |
| IPI0056573; IPI0056573; | 2.0000  | 3.3000  | 0.0000 | 1.2155 | 1.2731 | 2.0000  |
| IPI0056529; IPI0056529; | 4.0000  | 16.4000 | 0.0000 | NaN    | NaN    | 1.0000  |
| IPI0056527; IPI0056527; | 5.0000  | 32.9000 | 0.0000 | 0.7695 | 1.1911 | 6.0000  |
| IPI0056521; IPI0056521; | 23.0000 | 45.3000 | 0.0000 | 1.0053 | 1.0070 | 70.0000 |
| IPI0056519; IPI0056519; | 10.0000 | 32.1000 | 0.0000 | 1.0975 | 1.2707 | 9.0000  |
| IPI0056515; IPI0056515; | 3.0000  | 37.5000 | 0.0000 | 1.1890 | 1.0806 | 4.0000  |
| IPI0056512; IPI0056512; | 1.0000  | 3.1000  | 0.0002 | 0.8217 | 0.9485 | 2.0000  |
| IPI0056496; IPI0056496; | 1.0000  | 1.5000  | 0.0005 | NaN    | NaN    | 1.0000  |
| IPI0056491; IPI0056491; | 3.0000  | 8.7000  | 0.0000 | 1.0051 | 1.0780 | 9.0000  |
| IPI0056471; IPI0056471; | 4.0000  | 6.2000  | 0.0000 | 1.0032 | 1.0390 | 5.0000  |
| IPI0056462; IPI0056462; | 3.0000  | 8.6000  | 0.0000 | NaN    | NaN    | 1.0000  |
| IPI0056433; IPI0056433; | 10.0000 | 44.4000 | 0.0000 | 1.0245 | 0.9612 | 25.0000 |
| IPI0056414; IPI0056414; | 1.0000  | 1.5000  | 0.0006 | NaN    | NaN    | 0.0000  |
| IPI0056413; IPI0056413; | 6.0000  | 18.5000 | 0.0000 | 1.2731 | 1.7600 | 2.0000  |
| IPI0056411; IPI0056411; | 4.0000  | 6.3000  | 0.0000 | 0.8745 | 0.9697 | 2.0000  |

|             |            |         |         |        |        |
|-------------|------------|---------|---------|--------|--------|
| IPI0038851  | Q3MHS2     | 7.3000  | 2.0000  | 0.0000 | 1.0544 |
| IPI0020451  | Q9JMB5     | 5.9000  | 2.0000  | 0.0079 | 1.0545 |
| IPI0019592  | Q55156     | 11.0000 | 11.0000 | 0.0000 | 1.0546 |
| IPI0095105  | P25235     | 7.8000  | 5.0000  | 0.0000 | 1.0547 |
| IPI00357986 |            | 2.6000  | 2.0000  | 0.0083 | 1.0549 |
| IPI0040057  | Q6P7A9     | 2.0000  | 2.0000  | 0.0008 | 1.0552 |
| IPI0020820  | Q9Z0V5     | 7.7000  | 2.0000  | 0.0000 | 1.0560 |
| IPI0033195  | P19627     | 5.1000  | 2.0000  | 0.0000 | 1.0560 |
| IPI00358945 | IPI0038888 | 14.9000 | 2.0000  | 0.0000 | 1.0560 |
| IPI00194649 |            | 11.6000 | 2.0000  | 0.0000 | 1.0562 |
| IPI0035962  | Q568Z6     | 5.2000  | 2.0000  | 0.0000 | 1.0565 |
| IPI0042142  | P25113;P1  | 8.3000  | 2.0000  | 0.0001 | 1.0566 |
| IPI0019473  | O08662;Q7  | 1.1000  | 2.0000  | 0.0000 | 1.0567 |
| IPI0020012  | Q9JHZ4-1;C | 9.6000  | 8.0000  | 0.0000 | 1.0568 |
| IPI0078194  | P04256;Q5  | 16.9000 | 6.0000  | 0.0000 | 1.0568 |
| IPI0036376  | A0MZ67-1;A | 15.8000 | 10.0000 | 0.0000 | 1.0569 |
| IPI00358345 | IPI0095102 | 17.4000 | 3.0000  | 0.0000 | 1.0572 |
| IPI0023136  | P61354     | 20.6000 | 3.0000  | 0.0000 | 1.0574 |
| IPI0023091  | P12001;Q0  | 27.1000 | 6.0000  | 0.0000 | 1.0576 |
| IPI0036461  | Q4QQT7     | 3.1000  | 3.0000  | 0.0000 | 1.0580 |
| IPI0056982  | B5DEJ9     | 3.2000  | 6.0000  | 0.0000 | 1.0585 |
| IPI0019195  | Q6AZ50     | 7.0000  | 2.0000  | 0.0000 | 1.0587 |
| IPI0076014  | P20070-2;F | 10.4000 | 3.0000  | 0.0000 | 1.0590 |
| IPI0019656  | Q80ZG1;B1  | 6.8000  | 4.0000  | 0.0000 | 1.0591 |
| IPI00366120 | IPI0094924 | 2.8000  | 2.0000  | 0.0000 | 1.0592 |
| IPI0055715  | Q5BJV5     | 3.4000  | 4.0000  | 0.0000 | 1.0592 |
| IPI0020633  | P14562     | 9.8000  | 4.0000  | 0.0000 | 1.0593 |
| IPI0019675  | P28042     | 21.2000 | 3.0000  | 0.0000 | 1.0594 |
| IPI0020130  | B2RYS2     | 23.4000 | 3.0000  | 0.0001 | 1.0595 |
| IPI0021097  | Q63617;Q6  | 11.7000 | 12.0000 | 0.0000 | 1.0596 |
| IPI0037248  | B2GV01;Q4  | 5.8000  | 4.0000  | 0.0000 | 1.0596 |
| IPI0056272  | B2RZ63     | 3.9000  | 2.0000  | 0.0000 | 1.0596 |
| IPI0036248  | Q68G33;Q9  | 10.4000 | 4.0000  | 0.0000 | 1.0597 |
| IPI0020004  | Q920B2     | 16.0000 | 11.0000 | 0.0000 | 1.0602 |
| IPI0056287  | Q4KLH1     | 7.1000  | 16.0000 | 0.0000 | 1.0603 |
| IPI00199953 |            | 3.8000  | 3.0000  | 0.0000 | 1.0606 |
| IPI0039005  | Q5PQR0     | 8.0000  | 3.0000  | 0.0005 | 1.0608 |
| IPI00367524 | IPI0086993 | 9.3000  | 3.0000  | 0.0000 | 1.0610 |
| IPI00766690 |            | 5.3000  | 5.0000  | 0.0000 | 1.0611 |
| IPI00372282 | IPI0094804 | 3.4000  | 3.0000  | 0.0000 | 1.0612 |
| IPI0047160  | Q66X93     | 17.8000 | 14.0000 | 0.0000 | 1.0612 |
| IPI0036988  | Q2KMK7;Q   | 3.6000  | 8.0000  | 0.0000 | 1.0615 |

|            |            |         |         |        |        |        |          |
|------------|------------|---------|---------|--------|--------|--------|----------|
| IPI0056404 | IPI0056404 | 3.0000  | 9.5000  | 0.0000 | NaN    | NaN    | 1.0000   |
| IPI0056397 | IPI0056397 | 19.0000 | 46.6000 | 0.0000 | 0.9435 | 0.9914 | 31.0000  |
| IPI0056392 | IPI0056392 | 8.0000  | 23.0000 | 0.0000 | 1.0258 | 0.8347 | 6.0000   |
| IPI0056387 | IPI0056387 | 5.0000  | 45.8000 | 0.0000 | 0.8326 | 0.8789 | 9.0000   |
| IPI0056374 | IPI0056374 | 6.0000  | 14.2000 | 0.0000 | 1.2008 | 1.1504 | 7.0000   |
| IPI0056366 | IPI0056366 | 6.0000  | 40.9000 | 0.0000 | 0.9652 | 0.9839 | 15.0000  |
| IPI0056341 | IPI0056341 | 6.0000  | 21.9000 | 0.0000 | 0.9880 | NaN    | 1.0000   |
| IPI0056307 | IPI0056307 | 5.0000  | 20.1000 | 0.0000 | 1.2288 | 1.2698 | 6.0000   |
| IPI0056287 | IPI0056287 | 16.0000 | 11.9000 | 0.0000 | 0.8411 | 0.9991 | 14.0000  |
| IPI0056279 | IPI0056279 | 6.0000  | 19.9000 | 0.0000 | 1.4404 | 1.3313 | 9.0000   |
| IPI0056272 | IPI0056272 | 6.0000  | 16.7000 | 0.0000 | 0.8729 | 1.3078 | 4.0000   |
| IPI0056267 | IPI0056267 | 3.0000  | 4.8000  | 0.0000 | 1.2182 | NaN    | 1.0000   |
| IPI0056263 | IPI0056263 | 12.0000 | 25.5000 | 0.0000 | 1.0799 | 1.1171 | 10.0000  |
| IPI0056230 | IPI0056230 | 14.0000 | 26.4000 | 0.0000 | 1.0619 | 1.1191 | 24.0000  |
| IPI0056225 | IPI0056225 | 22.0000 | 56.2000 | 0.0000 | 0.8472 | 0.8371 | 4.0000   |
| IPI0056221 | IPI0056221 | 2.0000  | 4.7000  | 0.0003 | 0.8669 | 1.0236 | 2.0000   |
| IPI0056205 | IPI0056205 | 3.0000  | 5.9000  | 0.0000 | NaN    | 0.9943 | 2.0000   |
| IPI0056191 | IPI0056191 | 3.0000  | 17.9000 | 0.0000 | 0.8292 | 0.8150 | 7.0000   |
| IPI0056185 | IPI0056185 | 2.0000  | 1.8000  | 0.0002 | NaN    | 0.9167 | 3.0000   |
| IPI0056184 | IPI0056184 | 7.0000  | 36.3000 | 0.0000 | 0.7616 | 0.8900 | 15.0000  |
| IPI0056181 | IPI0056181 | 1.0000  | 8.3000  | 0.0002 | 1.2179 | NaN    | 0.0000   |
| IPI0056180 | IPI0056180 | 11.0000 | 24.3000 | 0.0000 | 1.0245 | 0.9335 | 24.0000  |
| IPI0056175 | IPI0056175 | 9.0000  | 75.5000 | 0.0000 | 0.9799 | 1.0119 | 25.0000  |
| IPI0056166 | IPI0056166 | 13.0000 | 53.8000 | 0.0000 | 1.0187 | 1.0124 | 45.0000  |
| IPI0056151 | IPI0056151 | 20.0000 | 67.9000 | 0.0000 | 0.9805 | 0.9117 | 43.0000  |
| IPI0056130 | IPI0056130 | 12.0000 | 28.7000 | 0.0000 | 1.0725 | 0.8387 | 13.0000  |
| IPI0056114 | IPI0056114 | 19.0000 | 45.7000 | 0.0000 | 1.0003 | 1.0299 | 30.0000  |
| IPI0056110 | IPI0056110 | 18.0000 | 32.2000 | 0.0000 | 1.0034 | NaN    | 1.0000   |
| IPI0056106 | IPI0056106 | 55.0000 | 83.4000 | 0.0000 | 0.8984 | 0.9485 | 223.0000 |
| IPI0056105 | IPI0056105 | 4.0000  | 5.4000  | 0.0000 | 1.2769 | 1.0843 | 3.0000   |
| IPI0056097 | IPI0056097 | 4.0000  | 13.4000 | 0.0000 | NaN    | 0.4838 | 4.0000   |
| IPI0056097 | IPI0056097 | 15.0000 | 27.0000 | 0.0000 | 0.9509 | 0.9502 | 46.0000  |
| IPI0056094 | IPI0056094 | 5.0000  | 5.9000  | 0.0000 | 0.8007 | NaN    | 1.0000   |
| IPI0056081 | IPI0056081 | 1.0000  | 5.5000  | 0.0000 | NaN    | 1.4267 | 5.0000   |
| IPI0056056 | IPI0056056 | 12.0000 | 39.2000 | 0.0000 | 0.9550 | 1.0143 | 32.0000  |
| IPI0056053 | IPI0056053 | 11.0000 | 52.3000 | 0.0000 | 0.9946 | 0.9797 | 23.0000  |
| IPI0056046 | IPI0056046 | 16.0000 | 73.9000 | 0.0000 | 2.7654 | 8.4443 | 6.0000   |
| IPI0056040 | IPI0056040 | 3.0000  | 4.8000  | 0.0000 | 1.8305 | 1.0113 | 4.0000   |
| IPI0056036 | IPI0056036 | 22.0000 | 40.1000 | 0.0000 | 1.0142 | 0.9560 | 36.0000  |
| IPI0056035 | IPI0056035 | 3.0000  | 16.9000 | 0.0000 | 0.9756 | 1.0657 | 4.0000   |
| IPI0056035 | IPI0056035 | 8.0000  | 12.8000 | 0.0000 | 0.9454 | 1.0351 | 16.0000  |
| IPI0056027 | IPI0056027 | 3.0000  | 15.4000 | 0.0000 | 1.1338 | 1.0480 | 3.0000   |

|             |            |         |         |        |        |
|-------------|------------|---------|---------|--------|--------|
| IPI0020821  | Q8VIL3;B35 | 12.4000 | 3.0000  | 0.0000 | 1.0618 |
| IPI0020450  | Q9JMB3;A3  | 4.1000  | 3.0000  | 0.0000 | 1.0619 |
| IPI0095131  | Q08603;Q6  | 5.3000  | 2.0000  | 0.0000 | 1.0621 |
| IPI00870706 |            | 1.2000  | 2.0000  | 0.0000 | 1.0621 |
| IPI00387945 |            | 7.0000  | 5.0000  | 0.0000 | 1.0625 |
| IPI00360916 |            | 4.9000  | 8.0000  | 0.0000 | 1.0626 |
| IPI0020590  | Q63151-1;C | 4.6000  | 3.0000  | 0.0000 | 1.0630 |
| IPI0037033  | Q5I0K8     | 16.9000 | 3.0000  | 0.0000 | 1.0635 |
| IPI0018911  | Q3B7U1;Q9  | 3.4000  | 2.0000  | 0.0015 | 1.0638 |
| IPI0033912  | P07340;Q9  | 5.9000  | 2.0000  | 0.0000 | 1.0638 |
| IPI0079862  | Q00566-2;C | 11.0000 | 4.0000  | 0.0000 | 1.0638 |
| IPI00366516 | IPI0094923 | 8.8000  | 5.0000  | 0.0000 | 1.0642 |
| IPI0036521  | P60892;P0  | 6.6000  | 2.0000  | 0.0000 | 1.0643 |
| IPI0089678  | B2RZD4;P1  | 20.5000 | 3.0000  | 0.0000 | 1.0643 |
| IPI0094921  | Q99JD4     | 7.6000  | 9.0000  | 0.0000 | 1.0645 |
| IPI0076713  | B5DFK9     | 6.2000  | 15.0000 | 0.0000 | 1.0645 |
| IPI0021354  | Q9QXU2;Q   | 2.5000  | 2.0000  | 0.0091 | 1.0648 |
| IPI0020887  | Q66H79     | 4.3000  | 3.0000  | 0.0000 | 1.0649 |
| IPI0039163  | Q925G1-1;C | 6.4000  | 4.0000  | 0.0000 | 1.0662 |
| IPI00766790 |            | 3.8000  | 3.0000  | 0.0000 | 1.0670 |
| IPI00780553 | IPI0094880 | 2.5000  | 4.0000  | 0.0000 | 1.0671 |
| IPI0055996  | Q63714     | 4.5000  | 14.0000 | 0.0000 | 1.0672 |
| IPI0036281  | B5DFL9     | 5.7000  | 4.0000  | 0.0000 | 1.0680 |
| IPI0056219  | Q50519;Q92 | 3.0000  | 2.0000  | 0.0005 | 1.0683 |
| IPI00367000 | IPI0076305 | 2.0000  | 3.0000  | 0.0000 | 1.0683 |
| IPI00373722 |            | 1.7000  | 2.0000  | 0.0000 | 1.0683 |
| IPI0076437  | Q6TRW4-1;  | 1.5000  | 2.0000  | 0.0000 | 1.0683 |
| IPI0019757  | Q5XIW8     | 9.6000  | 7.0000  | 0.0000 | 1.0686 |
| IPI0056934  | Q32KJ4     | 3.1000  | 2.0000  | 0.0000 | 1.0690 |
| IPI0019173  | Q05683;Q7  | 5.8000  | 3.0000  | 0.0000 | 1.0693 |
| IPI0077862  | O08875;Q9  | 5.5000  | 2.0000  | 0.0000 | 1.0694 |
| IPI00950550 | IPI0039144 | 1.7000  | 4.0000  | 0.0000 | 1.0694 |
| IPI0036594  | Q498U4     | 22.4000 | 4.0000  | 0.0000 | 1.0703 |
| IPI0076513  | B5DFG2;Q5  | 6.6000  | 4.0000  | 0.0000 | 1.0706 |
| IPI00366745 | IPI0021411 | 9.6000  | 5.0000  | 0.0000 | 1.0706 |
| IPI0078044  | Q9QX74-7;  | 1.0000  | 2.0000  | 0.0000 | 1.0708 |
| IPI0020478  | Q924K2     | 3.1000  | 2.0000  | 0.0000 | 1.0712 |
| IPI0091417  | B4F7C9     | 4.9000  | 4.0000  | 0.0000 | 1.0712 |
| IPI0021346  | Q9QXQ0;Q   | 4.1000  | 4.0000  | 0.0000 | 1.0713 |
| IPI0042171  | Q6PDU7     | 24.3000 | 2.0000  | 0.0000 | 1.0713 |
| IPI0077986  | P57769;Q8  | 6.5000  | 2.0000  | 0.0000 | 1.0715 |
| IPI0042196  | Q6MG08     | 6.6000  | 4.0000  | 0.0000 | 1.0718 |

|            |            |         |         |        |        |        |          |
|------------|------------|---------|---------|--------|--------|--------|----------|
| IPI0056000 | IPI0056000 | 10.0000 | 58.8000 | 0.0000 | 0.9869 | 1.0023 | 13.0000  |
| IPI0055989 | IPI0055989 | 19.0000 | 47.4000 | 0.0000 | NaN    | NaN    | 0.0000   |
| IPI0055981 | IPI0055981 | 1.0000  | 6.2000  | 0.0005 | 1.1022 | NaN    | 1.0000   |
| IPI0055955 | IPI0055955 | 13.0000 | 54.3000 | 0.0000 | 0.9525 | 1.0245 | 24.0000  |
| IPI0055943 | IPI0055943 | 2.0000  | 7.7000  | 0.0001 | NaN    | 0.8503 | 2.0000   |
| IPI0055927 | IPI0055927 | 15.0000 | 38.9000 | 0.0000 | 0.9904 | 0.9696 | 48.0000  |
| IPI0055917 | IPI0055917 | 9.0000  | 41.3000 | 0.0000 | 1.4472 | 1.1024 | 16.0000  |
| IPI0055909 | IPI0055909 | 17.0000 | 81.4000 | 0.0000 | 1.0239 | 1.0150 | 57.0000  |
| IPI0055899 | IPI0055899 | 13.0000 | 49.6000 | 0.0000 | 1.0842 | 1.0366 | 13.0000  |
| IPI0055890 | IPI0055890 | 5.0000  | 12.9000 | 0.0000 | 0.9723 | 0.9040 | 5.0000   |
| IPI0055879 | IPI0055879 | 40.0000 | 85.3000 | 0.0000 | 0.9532 | 0.9685 | 146.0000 |
| IPI0055863 | IPI0055863 | 10.0000 | 42.3000 | 0.0000 | 1.0265 | 1.1066 | 11.0000  |
| IPI0055821 | IPI0055821 | 5.0000  | 21.0000 | 0.0000 | 1.1118 | 1.0233 | 11.0000  |
| IPI0055817 | IPI0055817 | 8.0000  | 22.6000 | 0.0000 | 0.9632 | 1.0740 | 16.0000  |
| IPI0055815 | IPI0055815 | 5.0000  | 16.3000 | 0.0000 | 0.8624 | 0.9196 | 10.0000  |
| IPI0055805 | IPI0055805 | 13.0000 | 46.6000 | 0.0000 | 0.9847 | 0.9531 | 19.0000  |
| IPI0055789 | IPI0055789 | 3.0000  | 11.3000 | 0.0000 | 0.7829 | 0.7410 | 2.0000   |
| IPI0055761 | IPI0055761 | 6.0000  | 30.5000 | 0.0000 | 1.5995 | 0.8816 | 9.0000   |
| IPI0055733 | IPI0055733 | 13.0000 | 38.5000 | 0.0000 | 0.9777 | 1.0546 | 19.0000  |
| IPI0055732 | IPI0055732 | 14.0000 | 56.9000 | 0.0000 | 0.9995 | 1.0125 | 12.0000  |
| IPI0055732 | IPI0055732 | 7.0000  | 58.7000 | 0.0000 | 0.9790 | 0.9489 | 19.0000  |
| IPI0055732 | IPI0055732 | 10.0000 | 13.6000 | 0.0000 | 1.2172 | 1.0670 | 11.0000  |
| IPI0055716 | IPI0055716 | 9.0000  | 87.0000 | 0.0000 | 1.0390 | 0.9881 | 18.0000  |
| IPI0055714 | IPI0055714 | 1.0000  | 5.7000  | 0.0005 | NaN    | NaN    | 0.0000   |
| IPI0055697 | IPI0055697 | 7.0000  | 20.5000 | 0.0000 | 0.8290 | NaN    | 1.0000   |
| IPI0055697 | IPI0055697 | 55.0000 | 93.2000 | 0.0000 | 0.9130 | 0.8883 | 286.0000 |
| IPI0055693 | IPI0055693 | 15.0000 | 59.9000 | 0.0000 | NaN    | 0.7480 | 4.0000   |
| IPI0055532 | IPI0055532 | 10.0000 | 49.3000 | 0.0000 | 0.1912 | 0.1628 | 3.0000   |
| IPI0055531 | IPI0055531 | 28.0000 | 56.1000 | 0.0000 | 0.9526 | 0.9162 | 48.0000  |
| IPI0055530 | IPI0055530 | 6.0000  | 45.8000 | 0.0000 | 0.6485 | 0.8151 | 2.0000   |
| IPI0055530 | IPI0055530 | 8.0000  | 77.1000 | 0.0000 | 0.8021 | 0.6919 | 13.0000  |
| IPI0055530 | IPI0055530 | 7.0000  | 20.8000 | 0.0000 | 1.0026 | 0.9641 | 16.0000  |
| IPI0055528 | IPI0055528 | 73.0000 | 39.7000 | 0.0000 | 0.9468 | 0.9558 | 136.0000 |
| IPI0055528 | IPI0055528 | 3.0000  | 19.5000 | 0.0000 | NaN    | NaN    | 1.0000   |
| IPI0055526 | IPI0055526 | 15.0000 | 20.3000 | 0.0000 | 0.9873 | 1.1349 | 18.0000  |
| IPI0055525 | IPI0055525 | 23.0000 | 40.5000 | 0.0000 | 0.8987 | 0.9530 | 72.0000  |
| IPI0055525 | IPI0055525 | 1.0000  | 5.5000  | 0.0000 | NaN    | NaN    | 1.0000   |
| IPI0055525 | IPI0055525 | 37.0000 | 91.9000 | 0.0000 | 0.9556 | 0.9602 | 211.0000 |
| IPI0055521 | IPI0055521 | 23.0000 | 60.5000 | 0.0000 | 1.1090 | 1.0150 | 104.0000 |
| IPI0055521 | IPI0055521 | 3.0000  | 19.2000 | 0.0000 | 0.8160 | 0.8205 | 6.0000   |
| IPI0055519 | IPI0055519 | 8.0000  | 33.2000 | 0.0000 | 1.0651 | 0.9190 | 9.0000   |
| IPI0055518 | IPI0055518 | 32.0000 | 84.0000 | 0.0000 | 0.9768 | 0.9701 | 70.0000  |



|                        |         |         |        |        |
|------------------------|---------|---------|--------|--------|
| IPI0036034 Q641Z6      | 8.2000  | 4.0000  | 0.0000 | 1.0722 |
| IPI00869870            | 3.1000  | 3.0000  | 0.0000 | 1.0725 |
| IPI0019204 Q5XIT9      | 11.0000 | 5.0000  | 0.0000 | 1.0729 |
| IPI00911338            | 2.2000  | 2.0000  | 0.0021 | 1.0731 |
| IPI0020140 P20650;Q9   | 6.3000  | 2.0000  | 0.0000 | 1.0735 |
| IPI00203760 IPI0076867 | 10.1000 | 2.0000  | 0.0000 | 1.0736 |
| IPI00950040 IPI0036073 | 2.1000  | 2.0000  | 0.0000 | 1.0736 |
| IPI0020697 Q8VHF0      | 9.9000  | 7.0000  | 0.0000 | 1.0745 |
| IPI0019061 Q9QXY2-1;C  | 6.6000  | 8.0000  | 0.0000 | 1.0746 |
| IPI0046445 Q6URK4-2;C  | 15.1000 | 4.0000  | 0.0000 | 1.0747 |
| IPI0021052 B0BNG3      | 6.1000  | 2.0000  | 0.0000 | 1.0749 |
| IPI0076926 Q6EIX2      | 12.0000 | 2.0000  | 0.0000 | 1.0749 |
| IPI0076761 Q2P9S3;Q9   | 8.7000  | 6.0000  | 0.0000 | 1.0750 |
| IPI0036458 Q5XIG8      | 17.7000 | 6.0000  | 0.0000 | 1.0755 |
| IPI0065524 Q64605-1;C  | 1.4000  | 2.0000  | 0.0000 | 1.0759 |
| IPI00782287 IPI0037031 | 3.4000  | 3.0000  | 0.0000 | 1.0761 |
| IPI00215030            | 7.7000  | 6.0000  | 0.0000 | 1.0763 |
| IPI00389152            | 11.6000 | 2.0000  | 0.0001 | 1.0765 |
| IPI0020805 Q63374-2;C  | 2.0000  | 3.0000  | 0.0000 | 1.0766 |
| IPI00949612 IPI0039308 | 9.6000  | 16.0000 | 0.0000 | 1.0769 |
| IPI0028719 Q80ZA5-1;C  | 1.8000  | 2.0000  | 0.0000 | 1.0774 |
| IPI0037141 Q499N6      | 8.1000  | 2.0000  | 0.0001 | 1.0775 |
| IPI0037365 A0JPN7      | 7.3000  | 4.0000  | 0.0000 | 1.0775 |
| IPI0091422 B5DFK5;Q9   | 7.3000  | 8.0000  | 0.0000 | 1.0775 |
| IPI0094828 Q9JIL3-2;Q9 | 13.0000 | 11.0000 | 0.0000 | 1.0777 |
| IPI0079862 Q9R1K2-1;C  | 3.4000  | 10.0000 | 0.0000 | 1.0779 |
| IPI0021426 Q9QYM2      | 3.1000  | 2.0000  | 0.0000 | 1.0779 |
| IPI0037163 Q6AY58      | 12.2000 | 3.0000  | 0.0000 | 1.0782 |
| IPI0023098 Q80W92      | 11.4000 | 9.0000  | 0.0000 | 1.0785 |
| IPI0055394 O35116      | 9.1000  | 9.0000  | 0.0000 | 1.0785 |
| IPI0019131 A9UMV9      | 21.4000 | 2.0000  | 0.0000 | 1.0786 |
| IPI0077769 Q3KR86      | 16.3000 | 13.0000 | 0.0000 | 1.0787 |
| IPI0021007 Q91ZN1      | 6.9000  | 3.0000  | 0.0000 | 1.0788 |
| IPI0020556 P37397      | 17.0000 | 5.0000  | 0.0000 | 1.0789 |
| IPI0045422 Q9QYJ6-4;C  | 1.9000  | 2.0000  | 0.0001 | 1.0791 |
| IPI0036561 B5DEY8      | 7.1000  | 3.0000  | 0.0000 | 1.0794 |
| IPI0036946 Q5PPJ4      | 7.3000  | 2.0000  | 0.0000 | 1.0797 |
| IPI00766571            | 5.3000  | 5.0000  | 0.0000 | 1.0798 |
| IPI0035904 B4F783;Q4   | 5.7000  | 13.0000 | 0.0000 | 1.0801 |
| IPI0047699 P13596;Q3   | 18.5000 | 15.0000 | 0.0000 | 1.0803 |
| IPI0035825 B2RYL4      | 5.1000  | 2.0000  | 0.0000 | 1.0808 |
| IPI00360771 IPI0076695 | 8.3000  | 3.0000  | 0.0000 | 1.0809 |

|                         |         |         |        |        |        |          |
|-------------------------|---------|---------|--------|--------|--------|----------|
| IPI0055518 IPI0055518   | 10.0000 | 43.5000 | 0.0000 | 1.0101 | 0.9865 | 14.0000  |
| IPI0055515 IPI0055515   | 3.0000  | 23.8000 | 0.0000 | 0.9968 | 0.9876 | 5.0000   |
| IPI0055424 IPI0055424   | 16.0000 | 30.3000 | 0.0000 | 1.0648 | 1.0284 | 21.0000  |
| IPI0055419 IPI0055419   | 9.0000  | 11.3000 | 0.0000 | 0.8076 | 0.9718 | 5.0000   |
| IPI0055417 IPI0055417   | 7.0000  | 25.0000 | 0.0000 | 2.5688 | 1.1393 | 8.0000   |
| IPI0055413 IPI0055413   | 2.0000  | 9.7000  | 0.0000 | 0.7777 | NaN    | 1.0000   |
| IPI0055403 IPI0055403   | 33.0000 | 73.3000 | 0.0000 | NaN    | NaN    | 0.0000   |
| IPI0055403 IPI0055403   | 16.0000 | 67.3000 | 0.0000 | 0.9979 | 0.9966 | 59.0000  |
| IPI0055395 IPI0055395   | 2.0000  | 7.7000  | 0.0000 | 1.4213 | 1.3007 | 2.0000   |
| IPI0055394 IPI0055394   | 16.0000 | 17.3000 | 0.0000 | 0.9763 | 1.0362 | 24.0000  |
| IPI0055391 IPI0055391   | 3.0000  | 16.4000 | 0.0000 | 1.0573 | 1.2163 | 2.0000   |
| IPI0055389 IPI0055389   | 12.0000 | 58.5000 | 0.0000 | 1.0839 | 0.9467 | 11.0000  |
| IPI0055181 IPI0055181   | 11.0000 | 64.1000 | 0.0000 | 0.8889 | 0.9982 | 12.0000  |
| IPI0055181 IPI0055181   | 43.0000 | 80.0000 | 0.0000 | 0.9545 | 0.9433 | 265.0000 |
| IPI0055175 IPI0055175   | 3.0000  | 13.1000 | 0.0000 | 1.1211 | 1.1632 | 8.0000   |
| IPI0055173 IPI0055173   | 6.0000  | 26.2000 | 0.0000 | 0.9709 | 1.0601 | 14.0000  |
| IPI0055170 IPI0055170   | 14.0000 | 37.4000 | 0.0000 | 0.9737 | 0.9491 | 37.0000  |
| IPI0055167 IPI0055167   | 2.0000  | 8.1000  | 0.0000 | 1.1775 | 1.1718 | 2.0000   |
| IPI0055165 IPI0055165   | 7.0000  | 47.8000 | 0.0000 | 1.0008 | 0.9702 | 21.0000  |
| IPI0055156 IPI0055156   | 5.0000  | 21.4000 | 0.0000 | 0.9159 | 0.9823 | 16.0000  |
| IPI0055158 IPI0055158   | 3.0000  | 19.0000 | 0.0000 | 1.1297 | 0.8758 | 5.0000   |
| IPI00551584 IPI00551584 | 4.0000  | 18.7000 | 0.0000 | 0.9461 | 1.0798 | 6.0000   |
| IPI00551584 IPI00551584 | 4.0000  | 40.5000 | 0.0000 | 0.9640 | 0.9649 | 12.0000  |
| IPI00551577 IPI00551577 | 18.0000 | 63.0000 | 0.0000 | 1.0491 | 1.0017 | 50.0000  |
| IPI0048084 IPI0048084   | 12.0000 | 81.5000 | 0.0000 | 1.0308 | 1.0052 | 24.0000  |
| IPI0048084 IPI0048084   | 5.0000  | 37.7000 | 0.0000 | 0.9342 | 0.8843 | 13.0000  |
| IPI0048082 IPI0048082   | 11.0000 | 65.6000 | 0.0000 | 0.9857 | 0.9874 | 30.0000  |
| IPI0048074 IPI0048074   | 4.0000  | 12.3000 | 0.0000 | 1.2020 | 2.4986 | 3.0000   |
| IPI0048070 IPI0048070   | 16.0000 | 49.6000 | 0.0000 | 0.9868 | 1.0820 | 52.0000  |
| IPI0048068 IPI0048068   | 8.0000  | 32.7000 | 0.0000 | 1.0073 | 0.9961 | 24.0000  |
| IPI0048067 IPI0048067   | 11.0000 | 74.6000 | 0.0000 | 0.9157 | 0.7800 | 14.0000  |
| IPI0048062 IPI0048062   | 17.0000 | 54.4000 | 0.0000 | 0.9504 | 0.9906 | 63.0000  |
| IPI0048061 IPI0048061   | 5.0000  | 20.8000 | 0.0000 | 0.9911 | 1.0773 | 10.0000  |
| IPI0047699 IPI0047699   | 52.0000 | 54.7000 | 0.0000 | 1.2811 | 1.3385 | 4.0000   |
| IPI0047689 IPI0047689   | 10.0000 | 55.6000 | 0.0000 | 1.1250 | 0.9865 | 27.0000  |
| IPI0047667 IPI0047667   | 2.0000  | 8.1000  | 0.0000 | 1.2145 | NaN    | 1.0000   |
| IPI0047655 IPI0047655   | 9.0000  | 81.7000 | 0.0000 | 0.8820 | 0.8738 | 29.0000  |
| IPI0047649 IPI0047649   | 9.0000  | 88.4000 | 0.0000 | 0.9017 | 0.9574 | 31.0000  |
| IPI0047645 IPI0047645   | 8.0000  | 75.0000 | 0.0000 | 1.0635 | 1.0056 | 23.0000  |
| IPI0047629 IPI0047629   | 25.0000 | 53.9000 | 0.0000 | 1.0249 | 1.0643 | 58.0000  |
| IPI0047622 IPI0047622   | 2.0000  | 6.2000  | 0.0000 | NaN    | NaN    | 1.0000   |
| IPI0047617 IPI0047617   | 17.0000 | 66.3000 | 0.0000 | 0.9974 | 0.9770 | 53.0000  |

|             |            |         |         |        |        |
|-------------|------------|---------|---------|--------|--------|
| IPI0032733  | Q91ZW1;Q   | 13.1000 | 3.0000  | 0.0000 | 1.0813 |
| IPI0036970  | B4F763     | 2.9000  | 3.0000  | 0.0004 | 1.0816 |
| IPI00206234 |            | 2.9000  | 3.0000  | 0.0000 | 1.0817 |
| IPI0021181  | P23514     | 5.1000  | 5.0000  | 0.0000 | 1.0819 |
| IPI00364910 | IPI0094789 | 8.7000  | 7.0000  | 0.0000 | 1.0820 |
| IPI0021199  | P53678;P5  | 7.2000  | 3.0000  | 0.0000 | 1.0824 |
| IPI0037065  | O88864;Q2  | 1.3000  | 2.0000  | 0.0000 | 1.0824 |
| IPI0082944  | Q9JKC9-1;C | 2.6000  | 2.0000  | 0.0000 | 1.0826 |
| IPI0078050  | Q5PPL2     | 8.4000  | 2.0000  | 0.0011 | 1.0826 |
| IPI0094786  | B0BN52     | 5.1000  | 2.0000  | 0.0010 | 1.0828 |
| IPI0036431  | Q6P6V0     | 6.1000  | 3.0000  | 0.0000 | 1.0829 |
| IPI0036578  | Q4FZT2     | 12.4000 | 4.0000  | 0.0000 | 1.0830 |
| IPI0019248  | Q68FQ9     | 5.3000  | 2.0000  | 0.0000 | 1.0833 |
| IPI0076570  | A1L1K3     | 2.7000  | 2.0000  | 0.0000 | 1.0833 |
| IPI0037321  | Q6DGG0     | 9.2000  | 4.0000  | 0.0000 | 1.0836 |
| IPI00568785 | IPI0036345 | 4.8000  | 4.0000  | 0.0000 | 1.0837 |
| IPI0037326  | B5DFM4     | 8.8000  | 7.0000  | 0.0000 | 1.0840 |
| IPI00766893 | IPI0036215 | 1.5000  | 3.0000  | 0.0002 | 1.0844 |
| IPI0036540  | B2GUZ3     | 6.0000  | 6.0000  | 0.0000 | 1.0846 |
| IPI0036578  | Q5BJR3     | 2.5000  | 4.0000  | 0.0000 | 1.0847 |
| IPI0076647  | B5DFG5     | 8.2000  | 4.0000  | 0.0000 | 1.0848 |
| IPI0094819  | O35987     | 15.1000 | 5.0000  | 0.0000 | 1.0852 |
| IPI0021177  | P24155     | 12.8000 | 8.0000  | 0.0000 | 1.0855 |
| IPI0041737  | Q75N36;Q5  | 13.6000 | 7.0000  | 0.0000 | 1.0857 |
| IPI00950813 | IPI0036215 | 5.0000  | 5.0000  | 0.0000 | 1.0858 |
| IPI0020043  | Q9JID2;Q6  | 8.9000  | 4.0000  | 0.0000 | 1.0862 |
| IPI00369308 | IPI0076888 | 7.7000  | 3.0000  | 0.0000 | 1.0862 |
| IPI00192279 | IPI0056047 | 16.9000 | 4.0000  | 0.0000 | 1.0866 |
| IPI00870777 |            | 1.7000  | 2.0000  | 0.0000 | 1.0869 |
| IPI00372727 | IPI0077844 | 2.7000  | 3.0000  | 0.0000 | 1.0872 |
| IPI0028561  | P47245-2;F | 1.9000  | 2.0000  | 0.0087 | 1.0874 |
| IPI00366799 | IPI0095052 | 3.0000  | 3.0000  | 0.0000 | 1.0874 |
| IPI0021355  | Q9QXU8     | 12.4000 | 6.0000  | 0.0000 | 1.0877 |
| IPI0020334  | Q9WTT2;Q6  | 6.2000  | 4.0000  | 0.0000 | 1.0882 |
| IPI00765951 | IPI0087063 | 1.6000  | 2.0000  | 0.0013 | 1.0882 |
| IPI00765889 | IPI0039282 | 3.3000  | 2.0000  | 0.0023 | 1.0883 |
| IPI00948084 |            | 7.5000  | 10.0000 | 0.0000 | 1.0883 |
| IPI0091422  | B1WC02     | 5.4000  | 3.0000  | 0.0000 | 1.0886 |
| IPI0047190  | P49088     | 8.9000  | 5.0000  | 0.0000 | 1.0887 |
| IPI00952365 |            | 13.0000 | 24.0000 | 0.0000 | 1.0887 |
| IPI0055732  | Q811U3     | 7.2000  | 8.0000  | 0.0000 | 1.0888 |
| IPI0094951  | Q4V7C7;Q5  | 9.1000  | 4.0000  | 0.0000 | 1.0892 |

|            |            |         |         |        |        |        |          |
|------------|------------|---------|---------|--------|--------|--------|----------|
| IPI0047608 | IPI0047608 | 10.0000 | 40.7000 | 0.0000 | 1.0611 | 1.0628 | 33.0000  |
| IPI0047599 | IPI0047599 | 5.0000  | 15.6000 | 0.0000 | 1.1306 | 0.7978 | 5.0000   |
| IPI0047595 | IPI0047595 | 18.0000 | 50.7000 | 0.0000 | 1.0115 | 0.9413 | 40.0000  |
| IPI0047586 | IPI0047586 | 7.0000  | 14.8000 | 0.0000 | 1.0446 | 0.9674 | 6.0000   |
| IPI0047583 | IPI0047583 | 27.0000 | 69.0000 | 0.0000 | 0.9826 | 0.9131 | 63.0000  |
| IPI0047577 | IPI0047577 | 10.0000 | 64.7000 | 0.0000 | 0.9646 | 0.9895 | 37.0000  |
| IPI0047572 | IPI0047572 | 14.0000 | 48.9000 | 0.0000 | 0.9702 | 1.0304 | 50.0000  |
| IPI0047569 | IPI0047569 | 1.0000  | 21.2000 | 0.0009 | NaN    | NaN    | 0.0000   |
| IPI0047563 | IPI0047563 | 49.0000 | 82.2000 | 0.0000 | 1.0717 | 0.9922 | 18.0000  |
| IPI0047548 | IPI0047548 | 6.0000  | 12.5000 | 0.0000 | NaN    | NaN    | 1.0000   |
| IPI0047547 | IPI0047547 | 32.0000 | 82.1000 | 0.0000 | 1.0426 | 1.0115 | 117.0000 |
| IPI0047190 | IPI0047190 | 23.0000 | 58.6000 | 0.0000 | 0.9683 | 0.9878 | 45.0000  |
| IPI0047190 | IPI0047190 | 2.0000  | 4.5000  | 0.0000 | 0.8993 | NaN    | 0.0000   |
| IPI0047190 | IPI0047190 | 19.0000 | 55.9000 | 0.0000 | 0.9500 | 1.0427 | 33.0000  |
| IPI0047190 | IPI0047190 | 42.0000 | 53.7000 | 0.0000 | 0.9693 | 1.0060 | 115.0000 |
| IPI0047188 | IPI0047188 | 9.0000  | 40.1000 | 0.0000 | 1.0853 | 0.9809 | 16.0000  |
| IPI0047187 | IPI0047187 | 3.0000  | 6.7000  | 0.0000 | NaN    | 2.5352 | 3.0000   |
| IPI0047184 | IPI0047184 | 2.0000  | 5.4000  | 0.0000 | NaN    | NaN    | 1.0000   |
| IPI0047183 | IPI0047183 | 26.0000 | 45.3000 | 0.0000 | 1.0164 | 0.9600 | 50.0000  |
| IPI0047181 | IPI0047181 | 4.0000  | 9.0000  | 0.0000 | 1.1544 | NaN    | 1.0000   |
| IPI0047177 | IPI0047177 | 8.0000  | 16.4000 | 0.0000 | NaN    | 1.0146 | 5.0000   |
| IPI0047176 | IPI0047176 | 21.0000 | 66.5000 | 0.0000 | 1.1099 | 1.0913 | 33.0000  |
| IPI0047175 | IPI0047175 | 11.0000 | 34.5000 | 0.0000 | 0.9600 | 1.0658 | 18.0000  |
| IPI0047174 | IPI0047174 | 2.0000  | 9.0000  | 0.0000 | 1.2223 | 1.4987 | 5.0000   |
| IPI0047172 | IPI0047172 | 2.0000  | 9.8000  | 0.0000 | NaN    | 0.9817 | 2.0000   |
| IPI0047172 | IPI0047172 | 1.0000  | 4.0000  | 0.0004 | 1.0000 | 0.9542 | 2.0000   |
| IPI0047168 | IPI0047168 | 16.0000 | 48.4000 | 0.0000 | 0.9667 | 0.9413 | 26.0000  |
| IPI0047167 | IPI0047167 | 18.0000 | 75.9000 | 0.0000 | 0.9066 | 0.9717 | 48.0000  |
| IPI0047167 | IPI0047167 | 3.0000  | 15.0000 | 0.0000 | 0.9960 | 0.9963 | 3.0000   |
| IPI0047164 | IPI0047164 | 17.0000 | 47.3000 | 0.0000 | 0.9109 | 0.9182 | 34.0000  |
| IPI0047164 | IPI0047164 | 11.0000 | 29.9000 | 0.0000 | 1.0516 | 1.0779 | 34.0000  |
| IPI0047160 | IPI0047160 | 35.0000 | 55.0000 | 0.0000 | 1.0049 | 0.9723 | 65.0000  |
| IPI0047158 | IPI0047158 | 69.0000 | 71.0000 | 0.0000 | 1.0137 | 0.9954 | 396.0000 |
| IPI0047157 | IPI0047157 | 23.0000 | 61.7000 | 0.0000 | 0.9857 | 1.0250 | 77.0000  |
| IPI0047155 | IPI0047155 | 3.0000  | 8.2000  | 0.0000 | 1.1159 | 1.0430 | 2.0000   |
| IPI0047153 | IPI0047153 | 25.0000 | 60.5000 | 0.0000 | 0.9578 | 0.8984 | 43.0000  |
| IPI0047152 | IPI0047152 | 2.0000  | 6.7000  | 0.0000 | 0.9606 | 0.9842 | 2.0000   |
| IPI0047152 | IPI0047152 | 15.0000 | 30.4000 | 0.0000 | 1.0830 | 0.9901 | 42.0000  |
| IPI0047152 | IPI0047152 | 38.0000 | 68.0000 | 0.0000 | NaN    | NaN    | 0.0000   |
| IPI0047033 | IPI0047033 | 1.0000  | 4.1000  | 0.0001 | NaN    | 0.9272 | 3.0000   |
| IPI0047031 | IPI0047031 | 29.0000 | 72.5000 | 0.0000 | 0.9759 | 0.9898 | 105.0000 |
| IPI0047030 | IPI0047030 | 4.0000  | 20.8000 | 0.0000 | 1.0341 | 1.0759 | 7.0000   |

|             |            |         |         |        |        |
|-------------|------------|---------|---------|--------|--------|
| IPI0036844  | B5DF46     | 14.9000 | 3.0000  | 0.0000 | 1.0894 |
| IPI0036845  | Q6AYD5;Q8  | 9.1000  | 6.0000  | 0.0000 | 1.0895 |
| IPI00364667 | IPI0077867 | 3.4000  | 3.0000  | 0.0000 | 1.0896 |
| IPI0019037  | Q9EQS0     | 23.1000 | 9.0000  | 0.0000 | 1.0897 |
| IPI0087660  | Q62826-1;C | 23.2000 | 15.0000 | 0.0000 | 1.0904 |
| IPI0047583  | O08651     | 7.3000  | 3.0000  | 0.0000 | 1.0905 |
| IPI0095199  | P05065;Q6  | 25.4000 | 12.0000 | 0.0000 | 1.0908 |
| IPI0037126  | B2RYX0     | 19.5000 | 3.0000  | 0.0000 | 1.0910 |
| IPI00781464 | IPI0038868 | 2.2000  | 2.0000  | 0.0092 | 1.0915 |
| IPI0037140  | B2RYA5     | 10.2000 | 7.0000  | 0.0000 | 1.0916 |
| IPI0020454  | O54922     | 8.5000  | 5.0000  | 0.0000 | 1.0918 |
| IPI0019665  | Q7TP24;Q7  | 4.7000  | 3.0000  | 0.0000 | 1.0920 |
| IPI0088643  | B0BNJ1     | 11.1000 | 2.0000  | 0.0001 | 1.0920 |
| IPI0020826  | Q9Z173-1;C | 1.9000  | 3.0000  | 0.0000 | 1.0922 |
| IPI0037340  | Q4FZS7     | 3.9000  | 3.0000  | 0.0000 | 1.0925 |
| IPI0018999  | P47728     | 18.1000 | 5.0000  | 0.0000 | 1.0928 |
| IPI0076584  | B5DEP6     | 12.4000 | 6.0000  | 0.0000 | 1.0928 |
| IPI0019595  | O55165     | 5.8000  | 5.0000  | 0.0000 | 1.0929 |
| IPI0094830  | P19491-2;F | 10.0000 | 8.0000  | 0.0000 | 1.0931 |
| IPI0086977  | B1H2A2     | 12.3000 | 6.0000  | 0.0000 | 1.0935 |
| IPI0037063  | Q6PCT7     | 3.4000  | 2.0000  | 0.0000 | 1.0936 |
| IPI0094766  | Q91Z80;Q5  | 2.9000  | 4.0000  | 0.0000 | 1.0936 |
| IPI0023140  | Q07266-1;C | 13.3000 | 9.0000  | 0.0000 | 1.0939 |
| IPI0021556  | P09527     | 25.1000 | 5.0000  | 0.0000 | 1.0941 |
| IPI0021265  | P54313;Q4  | 10.0000 | 4.0000  | 0.0000 | 1.0945 |
| IPI00764383 |            | 15.7000 | 2.0000  | 0.0000 | 1.0945 |
| IPI00950011 |            | 3.3000  | 4.0000  | 0.0000 | 1.0946 |
| IPI00951184 | IPI0035835 | 2.9000  | 3.0000  | 0.0000 | 1.0947 |
| IPI00367234 | IPI0076574 | 4.3000  | 9.0000  | 0.0000 | 1.0948 |
| IPI0023167  | P68511     | 25.6000 | 7.0000  | 0.0000 | 1.0949 |
| IPI00765932 | IPI0095058 | 1.0000  | 4.0000  | 0.0000 | 1.0949 |
| IPI0055927  | Q1PBJ1;P7  | 6.2000  | 3.0000  | 0.0000 | 1.0957 |
| IPI0020436  | P07153;Q6  | 15.5000 | 9.0000  | 0.0000 | 1.0958 |
| IPI0085113  | Q9JKB7;Q9  | 5.7000  | 3.0000  | 0.0000 | 1.0958 |
| IPI0020725  | Q8VI02     | 4.2000  | 4.0000  | 0.0000 | 1.0960 |
| IPI00366375 |            | 3.0000  | 2.0000  | 0.0056 | 1.0961 |
| IPI0038212  | Q7TMB0;B   | 3.4000  | 2.0000  | 0.0000 | 1.0961 |
| IPI00567941 | IPI0095021 | 2.7000  | 6.0000  | 0.0000 | 1.0962 |
| IPI0036210  | Q32PW9     | 4.0000  | 2.0000  | 0.0064 | 1.0969 |
| IPI0039359  | P06302;Q6  | 37.5000 | 6.0000  | 0.0000 | 1.0972 |
| IPI0020928  | Q9Z269     | 11.5000 | 2.0000  | 0.0000 | 1.0974 |
| IPI0019173  | P61265     | 16.3000 | 5.0000  | 0.0000 | 1.0975 |

|            |            |         |         |        |        |        |          |
|------------|------------|---------|---------|--------|--------|--------|----------|
| IPI0047030 | IPI0047030 | 45.0000 | 88.7000 | 0.0000 | 1.0294 | 1.0039 | 140.0000 |
| IPI0047028 | IPI0047028 | 34.0000 | 80.8000 | 0.0000 | 0.8896 | 0.8778 | 239.0000 |
| IPI0047026 | IPI0047026 | 3.0000  | 29.1000 | 0.0000 | 0.9202 | 1.0117 | 6.0000   |
| IPI0047025 | IPI0047025 | 15.0000 | 23.7000 | 0.0000 | 1.0505 | 0.9792 | 6.0000   |
| IPI0047023 | IPI0047023 | 4.0000  | 11.5000 | 0.0000 | 1.0586 | 1.1022 | 6.0000   |
| IPI0046488 | IPI0046488 | 3.0000  | 7.5000  | 0.0000 | 0.6523 | NaN    | 0.0000   |
| IPI0046483 | IPI0046483 | 4.0000  | 19.3000 | 0.0000 | 0.6369 | 0.7531 | 5.0000   |
| IPI0046481 | IPI0046481 | 48.0000 | 95.2000 | 0.0000 | 0.9919 | 0.9778 | 207.0000 |
| IPI0046480 | IPI0046480 | 14.0000 | 61.1000 | 0.0000 | NaN    | NaN    | 1.0000   |
| IPI0046479 | IPI0046479 | 19.0000 | 56.2000 | 0.0000 | 0.9505 | 0.9665 | 39.0000  |
| IPI0046479 | IPI0046479 | 1.0000  | 8.2000  | 0.0000 | NaN    | NaN    | 0.0000   |
| IPI0046479 | IPI0046479 | 2.0000  | 8.3000  | 0.0000 | 0.9257 | 0.9330 | 3.0000   |
| IPI0046477 | IPI0046477 | 20.0000 | 80.8000 | 0.0000 | 0.9371 | 1.0929 | 47.0000  |
| IPI0046477 | IPI0046477 | 7.0000  | 18.8000 | 0.0000 | 0.9818 | 0.9247 | 18.0000  |
| IPI0046476 | IPI0046476 | 2.0000  | 9.2000  | 0.0000 | 1.0294 | 0.9111 | 2.0000   |
| IPI0046475 | IPI0046475 | 3.0000  | 6.3000  | 0.0000 | 1.8420 | 1.1813 | 4.0000   |
| IPI0046472 | IPI0046472 | 3.0000  | 8.6000  | 0.0000 | 0.8248 | 0.9843 | 4.0000   |
| IPI0046471 | IPI0046471 | 30.0000 | 48.6000 | 0.0000 | 0.9191 | 0.9981 | 49.0000  |
| IPI0046465 | IPI0046465 | 1.0000  | 5.8000  | 0.0000 | NaN    | 1.2205 | 4.0000   |
| IPI0046455 | IPI0046455 | 19.0000 | 53.7000 | 0.0000 | 1.0249 | 0.9716 | 49.0000  |
| IPI0046455 | IPI0046455 | 3.0000  | 10.2000 | 0.0000 | 2.0983 | 2.9205 | 2.0000   |
| IPI0046453 | IPI0046453 | 12.0000 | 55.6000 | 0.0000 | 0.9208 | 0.9626 | 23.0000  |
| IPI0046452 | IPI0046452 | 1.0000  | 12.3000 | 0.0000 | NaN    | NaN    | 0.0000   |
| IPI0046451 | IPI0046451 | 4.0000  | 7.4000  | 0.0000 | NaN    | 1.1746 | 3.0000   |
| IPI0046451 | IPI0046451 | 18.0000 | 51.7000 | 0.0000 | 0.8056 | 1.0959 | 19.0000  |
| IPI0046445 | IPI0046445 | 16.0000 | 53.8000 | 0.0000 | 1.1009 | 1.1307 | 6.0000   |
| IPI0046445 | IPI0046445 | 7.0000  | 39.4000 | 0.0000 | 0.9959 | 1.0529 | 7.0000   |
| IPI0046444 | IPI0046444 | 13.0000 | 57.1000 | 0.0000 | 0.8521 | 0.7492 | 6.0000   |
| IPI0045455 | IPI0045455 | 4.0000  | 14.9000 | 0.0000 | 0.7204 | 1.0868 | 3.0000   |
| IPI0045449 | IPI0045449 | 4.0000  | 29.2000 | 0.0000 | 1.1035 | 1.0620 | 8.0000   |
| IPI0045447 | IPI0045447 | 3.0000  | 7.7000  | 0.0000 | 2.3454 | 2.1674 | 3.0000   |
| IPI0045443 | IPI0045443 | 12.0000 | 19.7000 | 0.0000 | NaN    | 0.7198 | 2.0000   |
| IPI0045440 | IPI0045440 | 4.0000  | 20.5000 | 0.0000 | 0.8651 | 1.0309 | 6.0000   |
| IPI0045437 | IPI0045437 | 6.0000  | 24.1000 | 0.0000 | NaN    | NaN    | 1.0000   |
| IPI0045435 | IPI0045435 | 2.0000  | 6.9000  | 0.0000 | 0.9134 | 0.9913 | 3.0000   |
| IPI0045434 | IPI0045434 | 6.0000  | 24.7000 | 0.0000 | 0.7801 | 1.2415 | 6.0000   |
| IPI0045428 | IPI0045428 | 19.0000 | 25.9000 | 0.0000 | 1.0460 | 1.1679 | 8.0000   |
| IPI0042209 | IPI0042209 | 12.0000 | 62.0000 | 0.0000 | 0.9746 | 1.1015 | 43.0000  |
| IPI0042208 | IPI0042208 | 4.0000  | 41.7000 | 0.0000 | 0.9990 | 0.8615 | 10.0000  |
| IPI0042207 | IPI0042207 | 7.0000  | 47.0000 | 0.0000 | 1.1749 | 1.0998 | 7.0000   |
| IPI0042206 | IPI0042206 | 17.0000 | 72.4000 | 0.0000 | 0.9439 | 0.9613 | 16.0000  |
| IPI0042205 | IPI0042205 | 2.0000  | 4.8000  | 0.0000 | 0.9273 | 0.8760 | 2.0000   |

|             |            |         |         |        |        |
|-------------|------------|---------|---------|--------|--------|
| IPI0086980  | P85515;B2F | 8.5000  | 4.0000  | 0.0000 | 1.0975 |
| IPI00393501 | IPI0095194 | 5.6000  | 4.0000  | 0.0000 | 1.0981 |
| IPI0021324  | Q35867     | 3.0000  | 3.0000  | 0.0000 | 1.0985 |
| IPI0042135  | Q5I0H2;Q6  | 11.4000 | 16.0000 | 0.0000 | 1.0986 |
| IPI0056230  | P54319     | 6.8000  | 5.0000  | 0.0000 | 1.0986 |
| IPI0065009  | Q4G074     | 3.2000  | 2.0000  | 0.0119 | 1.0986 |
| IPI0021189  | Q63768-1;C | 12.8000 | 3.0000  | 0.0000 | 1.0987 |
| IPI0039031  | Q64560     | 8.9000  | 11.0000 | 0.0000 | 1.0987 |
| IPI00566655 |            | 31.0000 | 2.0000  | 0.0000 | 1.0989 |
| IPI00763061 |            | 7.3000  | 14.0000 | 0.0000 | 1.0991 |
| IPI0095189  | Q4V8J6     | 7.3000  | 4.0000  | 0.0000 | 1.0995 |
| IPI0055181  | Q3ZAV2;Q7  | 34.7000 | 7.0000  | 0.0000 | 1.1004 |
| IPI0019795  | Q99MI5     | 18.2000 | 4.0000  | 0.0000 | 1.1014 |
| IPI00194396 | IPI005662  | 15.5000 | 4.0000  | 0.0000 | 1.1029 |
| IPI0021035  | Q794E4     | 5.1000  | 2.0000  | 0.0000 | 1.1030 |
| IPI0033191  | Q68FU2;Q8  | 14.9000 | 5.0000  | 0.0000 | 1.1031 |
| IPI0023192  | P11980-1;F | 20.9000 | 13.0000 | 0.0000 | 1.1032 |
| IPI0076714  | P04764;Q5  | 18.4000 | 10.0000 | 0.0000 | 1.1032 |
| IPI0078183  | Q4V8K6     | 16.8000 | 7.0000  | 0.0000 | 1.1035 |
| IPI0019551  | O08729     | 7.9000  | 2.0000  | 0.0001 | 1.1035 |
| IPI0019252  | Q5RK19     | 8.9000  | 2.0000  | 0.0000 | 1.1036 |
| IPI0095128  | B1H240     | 10.6000 | 5.0000  | 0.0000 | 1.1037 |
| IPI0019173  | P48508;Q2  | 7.7000  | 2.0000  | 0.0000 | 1.1058 |
| IPI0023155  | Q9ER24     | 7.8000  | 3.0000  | 0.0000 | 1.1058 |
| IPI00361832 | IPI005678  | 11.9000 | 10.0000 | 0.0000 | 1.1060 |
| IPI00558170 |            | 13.6000 | 6.0000  | 0.0000 | 1.1069 |
| IPI00190176 |            | 10.7000 | 14.0000 | 0.0000 | 1.1071 |
| IPI00192733 | IPI0095176 | 6.9000  | 3.0000  | 0.0000 | 1.1079 |
| IPI0036458  | Q5PQQ2     | 8.3000  | 5.0000  | 0.0000 | 1.1083 |
| IPI00370475 | IPI007792  | 0.8000  | 2.0000  | 0.0016 | 1.1084 |
| IPI0019650  | O08839-1;C | 6.3000  | 4.0000  | 0.0000 | 1.1088 |
| IPI0019973  | Q6DKG0     | 4.3000  | 3.0000  | 0.0000 | 1.1091 |
| IPI00870574 | IPI0039342 | 5.8000  | 6.0000  | 0.0000 | 1.1091 |
| IPI0020049  | Q99P97     | 7.4000  | 8.0000  | 0.0000 | 1.1108 |
| IPI0020706  | Q62638     | 3.8000  | 5.0000  | 0.0000 | 1.1111 |
| IPI0051585  | Q5RK17     | 17.3000 | 4.0000  | 0.0000 | 1.1112 |
| IPI00371155 | IPI007686  | 2.2000  | 9.0000  | 0.0000 | 1.1112 |
| IPI0047186  | Q66HF3;Q6  | 5.7000  | 3.0000  | 0.0000 | 1.1113 |
| IPI00363856 | IPI0038906 | 8.0000  | 20.0000 | 0.0000 | 1.1114 |
| IPI00362117 | IPI0056470 | 6.5000  | 3.0000  | 0.0000 | 1.1117 |
| IPI0047190  | P18484;Q6  | 11.0000 | 11.0000 | 0.0000 | 1.1117 |
| IPI0055181  | P10719;Q0  | 21.9000 | 9.0000  | 0.0000 | 1.1126 |

|            |            |         |         |        |        |        |          |
|------------|------------|---------|---------|--------|--------|--------|----------|
| IPI0042196 | IPI0042196 | 2.0000  | 4.3000  | 0.0004 | NaN    | NaN    | 1.0000   |
| IPI0042195 | IPI0042195 | 4.0000  | 27.3000 | 0.0000 | 0.9853 | 0.9933 | 13.0000  |
| IPI0042195 | IPI0042195 | 5.0000  | 10.1000 | 0.0000 | 0.8722 | 0.7301 | 7.0000   |
| IPI0042194 | IPI0042194 | 2.0000  | 3.6000  | 0.0000 | 0.9705 | 1.0067 | 5.0000   |
| IPI0042192 | IPI0042192 | 3.0000  | 11.8000 | 0.0000 | 1.2504 | 1.0966 | 2.0000   |
| IPI0042191 | IPI0042191 | 4.0000  | 11.0000 | 0.0000 | 0.8339 | 0.8954 | 7.0000   |
| IPI0042190 | IPI0042190 | 4.0000  | 12.5000 | 0.0000 | 1.0249 | 0.8519 | 3.0000   |
| IPI0042189 | IPI0042189 | 16.0000 | 48.0000 | 0.0000 | 1.0991 | 1.1039 | 26.0000  |
| IPI0042189 | IPI0042189 | 18.0000 | 85.4000 | 0.0000 | 0.9902 | 0.9885 | 59.0000  |
| IPI0042187 | IPI0042187 | 2.0000  | 11.0000 | 0.0000 | 1.1216 | 3.6149 | 2.0000   |
| IPI0042187 | IPI0042187 | 34.0000 | 96.5000 | 0.0000 | 0.9485 | 1.0049 | 120.0000 |
| IPI0042176 | IPI0042176 | 6.0000  | 10.4000 | 0.0000 | 1.0042 | 0.6889 | 3.0000   |
| IPI0042172 | IPI0042172 | 8.0000  | 71.3000 | 0.0000 | 0.9738 | 0.9796 | 29.0000  |
| IPI0042171 | IPI0042171 | 6.0000  | 65.0000 | 0.0000 | 0.9188 | 1.0202 | 24.0000  |
| IPI0042169 | IPI0042169 | 2.0000  | 16.0000 | 0.0000 | 0.9637 | 1.0069 | 6.0000   |
| IPI0042168 | IPI0042168 | 2.0000  | 3.8000  | 0.0000 | 1.0219 | 1.1292 | 3.0000   |
| IPI0042163 | IPI0042163 | 2.0000  | 4.9000  | 0.0000 | 0.9745 | 1.0720 | 4.0000   |
| IPI0042162 | IPI0042162 | 26.0000 | 57.7000 | 0.0000 | 1.0694 | 1.0247 | 61.0000  |
| IPI0042162 | IPI0042162 | 3.0000  | 23.8000 | 0.0000 | 0.6553 | 0.9060 | 6.0000   |
| IPI0042162 | IPI0042162 | 13.0000 | 37.4000 | 0.0000 | 1.0894 | 1.1073 | 22.0000  |
| IPI0042161 | IPI0042161 | 4.0000  | 27.3000 | 0.0000 | 1.0351 | 0.9445 | 13.0000  |
| IPI0042160 | IPI0042160 | 2.0000  | 8.1000  | 0.0000 | NaN    | 0.6254 | 3.0000   |
| IPI0042160 | IPI0042160 | 26.0000 | 67.9000 | 0.0000 | 0.9809 | 0.9654 | 72.0000  |
| IPI0042153 | IPI0042153 | 51.0000 | 64.6000 | 0.0000 | 1.0233 | 1.0228 | 184.0000 |
| IPI0042152 | IPI0042152 | 24.0000 | 75.6000 | 0.0000 | 0.9330 | 0.9260 | 53.0000  |
| IPI0042151 | IPI0042151 | 39.0000 | 82.8000 | 0.0000 | 1.0019 | 1.0535 | 155.0000 |
| IPI0042150 | IPI0042150 | 8.0000  | 33.2000 | 0.0000 | 1.1329 | 1.0787 | 32.0000  |
| IPI0042146 | IPI0042146 | 7.0000  | 63.6000 | 0.0000 | 0.9528 | 0.7168 | 7.0000   |
| IPI0042145 | IPI0042145 | 12.0000 | 65.1000 | 0.0000 | 1.1569 | 1.0572 | 58.0000  |
| IPI0042143 | IPI0042143 | 3.0000  | 4.3000  | 0.0000 | 1.0750 | NaN    | 1.0000   |
| IPI0042142 | IPI0042142 | 22.0000 | 79.5000 | 0.0000 | 0.9764 | 1.0273 | 70.0000  |
| IPI0042142 | IPI0042142 | 15.0000 | 19.7000 | 0.0000 | 1.0603 | 1.1270 | 13.0000  |
| IPI0042141 | IPI0042141 | 17.0000 | 10.3000 | 0.0000 | 0.9585 | 0.9849 | 45.0000  |
| IPI0042139 | IPI0042139 | 9.0000  | 9.0000  | 0.0000 | 1.0058 | 1.1395 | 9.0000   |
| IPI0042139 | IPI0042139 | 12.0000 | 51.4000 | 0.0000 | 0.8964 | 0.8531 | 20.0000  |
| IPI0042137 | IPI0042137 | 15.0000 | 61.8000 | 0.0000 | 0.8974 | 1.3922 | 15.0000  |
| IPI0042136 | IPI0042136 | 4.0000  | 12.5000 | 0.0000 | 0.6992 | NaN    | 0.0000   |
| IPI0042135 | IPI0042135 | 59.0000 | 53.3000 | 0.0000 | 0.9972 | 0.9538 | 142.0000 |
| IPI0042132 | IPI0042132 | 4.0000  | 20.9000 | 0.0000 | 0.9209 | 0.8738 | 4.0000   |
| IPI0041775 | IPI0041775 | 26.0000 | 59.7000 | 0.0000 | 0.9964 | 0.9898 | 46.0000  |
| IPI0041774 | IPI0041774 | 6.0000  | 67.6000 | 0.0000 | 1.0810 | 0.9284 | 12.0000  |
| IPI0041773 | IPI0041773 | 2.0000  | 1.5000  | 0.0000 | 1.5521 | NaN    | 1.0000   |

|                        |         |         |        |        |
|------------------------|---------|---------|--------|--------|
| IPI0036596;Q5RJN0      | 16.5000 | 3.0000  | 0.0000 | 1.1127 |
| IPI0095166;P97603      | 5.6000  | 8.0000  | 0.0000 | 1.1127 |
| IPI0019898;Q99N11      | 24.3000 | 3.0000  | 0.0001 | 1.1128 |
| IPI00951706;IPI0095226 | 4.3000  | 10.0000 | 0.0000 | 1.1128 |
| IPI0087018;B0K020      | 16.7000 | 2.0000  | 0.0000 | 1.1128 |
| IPI0019647;Q5U2U0      | 3.8000  | 2.0000  | 0.0000 | 1.1130 |
| IPI0019963;P35565      | 11.7000 | 8.0000  | 0.0000 | 1.1130 |
| IPI00201566;IPI0076362 | 12.9000 | 5.0000  | 0.0000 | 1.1130 |
| IPI00207766;IPI0020412 | 10.0000 | 2.0000  | 0.0000 | 1.1130 |
| IPI0035794;B2GV03;P5   | 4.0000  | 4.0000  | 0.0000 | 1.1131 |
| IPI00362621;IPI0095150 | 2.8000  | 2.0000  | 0.0036 | 1.1131 |
| IPI0020936;O89035      | 6.6000  | 2.0000  | 0.0000 | 1.1138 |
| IPI0037214;Q5EB92      | 3.5000  | 2.0000  | 0.0018 | 1.1138 |
| IPI0020938;O35430;O3   | 6.1000  | 4.0000  | 0.0000 | 1.1140 |
| IPI00214613            | 6.2000  | 3.0000  | 0.0000 | 1.1141 |
| IPI0047030;Q68FQ0;Q6   | 20.3000 | 13.0000 | 0.0000 | 1.1144 |
| IPI0019168;P49134      | 2.5000  | 2.0000  | 0.0007 | 1.1147 |
| IPI0094796;Q62829      | 16.6000 | 8.0000  | 0.0000 | 1.1152 |
| IPI0020426;P52296      | 10.8000 | 10.0000 | 0.0000 | 1.1153 |
| IPI0023150;P56558      | 2.5000  | 2.0000  | 0.0000 | 1.1153 |
| IPI0020025;Q8R491      | 4.3000  | 2.0000  | 0.0000 | 1.1155 |
| IPI00366735;IPI0039268 | 8.3000  | 3.0000  | 0.0000 | 1.1156 |
| IPI0095105;P12711;Q7   | 5.3000  | 5.0000  | 0.0000 | 1.1157 |
| IPI0020106;P48679;P7   | 4.2000  | 3.0000  | 0.0000 | 1.1158 |
| IPI0021022;Q62936-1;C  | 2.8000  | 2.0000  | 0.0004 | 1.1161 |
| IPI0021531;Q498N5;Q6   | 4.5000  | 5.0000  | 0.0000 | 1.1166 |
| IPI00870772;IPI0036344 | 6.4000  | 10.0000 | 0.0000 | 1.1168 |
| IPI0032738;Q7TSU1      | 2.1000  | 4.0000  | 0.0000 | 1.1169 |
| IPI0036087;B2RZB5      | 7.2000  | 2.0000  | 0.0001 | 1.1171 |
| IPI0078253;B5DER4      | 9.4000  | 3.0000  | 0.0000 | 1.1172 |
| IPI0020320;B1H2A6;Q8   | 9.5000  | 5.0000  | 0.0000 | 1.1173 |
| IPI0076603;Q6DGF2      | 6.0000  | 3.0000  | 0.0000 | 1.1173 |
| IPI0095018;B5DEJ1      | 6.3000  | 6.0000  | 0.0000 | 1.1173 |
| IPI0018816;P18088;C9   | 6.9000  | 3.0000  | 0.0000 | 1.1174 |
| IPI0042187;Q9Z2L0      | 19.1000 | 4.0000  | 0.0000 | 1.1175 |
| IPI00763802;IPI0086952 | 9.4000  | 12.0000 | 0.0000 | 1.1177 |
| IPI0019758;Q641W2      | 5.2000  | 2.0000  | 0.0003 | 1.1178 |
| IPI0020141;P63329-1;F  | 17.5000 | 8.0000  | 0.0000 | 1.1178 |
| IPI00372524            | 10.7000 | 8.0000  | 0.0000 | 1.1178 |
| IPI0055175;Q63190;Q6   | 21.2000 | 5.0000  | 0.0000 | 1.1178 |
| IPI00949967;IPI0094996 | 10.1000 | 4.0000  | 0.0000 | 1.1179 |
| IPI0088456;Q9WVC0;A    | 11.4000 | 5.0000  | 0.0000 | 1.1182 |

|                         |         |         |        |        |        |          |
|-------------------------|---------|---------|--------|--------|--------|----------|
| IPI0041737; IPI0041737; | 12.0000 | 15.3000 | 0.0000 | 0.8988 | 0.9265 | 16.0000  |
| IPI0041121; IPI0041121; | 4.0000  | 47.3000 | 0.0000 | 1.2563 | 1.0711 | 3.0000   |
| IPI0040954; IPI0040954; | 1.0000  | 5.7000  | 0.0002 | NaN    | 0.9778 | 3.0000   |
| IPI0040954; IPI0040954; | 8.0000  | 14.8000 | 0.0000 | 0.8738 | 0.9513 | 10.0000  |
| IPI0040953; IPI0040953; | 19.0000 | 12.2000 | 0.0000 | 1.1551 | 1.0235 | 23.0000  |
| IPI0040951; IPI0040951; | 20.0000 | 32.4000 | 0.0000 | 1.0079 | 0.8808 | 23.0000  |
| IPI0040075; IPI0040075; | 3.0000  | 13.2000 | 0.0000 | 0.6623 | 0.7802 | 3.0000   |
| IPI0040074; IPI0040074; | 2.0000  | 13.6000 | 0.0000 | 0.9882 | 0.9630 | 2.0000   |
| IPI0040072; IPI0040072; | 3.0000  | 7.8000  | 0.0000 | NaN    | 1.0198 | 2.0000   |
| IPI0040064; IPI0040064; | 2.0000  | 9.2000  | 0.0000 | 0.9722 | NaN    | 0.0000   |
| IPI0040061; IPI0040061; | 18.0000 | 68.1000 | 0.0000 | 0.9580 | 1.0730 | 51.0000  |
| IPI0040060; IPI0040060; | 14.0000 | 68.1000 | 0.0000 | 1.0337 | 1.0107 | 37.0000  |
| IPI0040057; IPI0040057; | 18.0000 | 27.3000 | 0.0000 | 1.0542 | 1.0344 | 35.0000  |
| IPI0040057; IPI0040057; | 30.0000 | 44.7000 | 0.0000 | 0.9961 | 1.0696 | 69.0000  |
| IPI0040057; IPI0040057; | 45.0000 | 80.2000 | 0.0000 | 0.9831 | 0.9614 | 74.0000  |
| IPI0040053; IPI0040053; | 4.0000  | 2.2000  | 0.0000 | 0.9862 | NaN    | 0.0000   |
| IPI0039691; IPI0039691; | 77.0000 | 80.5000 | 0.0000 | 1.0064 | 1.0080 | 331.0000 |
| IPI0039686; IPI0039686; | 2.0000  | 3.1000  | 0.0001 | 7.7410 | 2.8044 | 2.0000   |
| IPI0039528; IPI0039528; | 8.0000  | 43.5000 | 0.0000 | 1.0733 | 1.0368 | 11.0000  |
| IPI0039528; IPI0039528; | 39.0000 | 71.5000 | 0.0000 | 0.9348 | 0.9776 | 134.0000 |
| IPI0039528; IPI0039528; | 7.0000  | 17.7000 | 0.0000 | 0.9119 | 1.0852 | 5.0000   |
| IPI0039527; IPI0039527; | 5.0000  | 15.1000 | 0.0000 | 0.9932 | 1.0225 | 6.0000   |
| IPI0039448; IPI0039448; | 13.0000 | 73.3000 | 0.0000 | 1.0169 | 0.9546 | 22.0000  |
| IPI0039447; IPI0039447; | 6.0000  | 25.5000 | 0.0000 | 1.1089 | 0.9514 | 12.0000  |
| IPI0039435; IPI0039435; | 2.0000  | 7.8000  | 0.0000 | 0.7595 | 0.7267 | 3.0000   |
| IPI0039411; IPI0039411; | 3.0000  | 7.9000  | 0.0000 | 1.0675 | NaN    | 1.0000   |
| IPI0039403; IPI0039403; | 8.0000  | 27.8000 | 0.0000 | 1.0266 | 1.1029 | 12.0000  |
| IPI0039359; IPI0039359; | 7.0000  | 30.4000 | 0.0000 | 0.9691 | 0.9436 | 33.0000  |
| IPI0039356; IPI0039356; | 2.0000  | 7.1000  | 0.0000 | 2.8877 | NaN    | 0.0000   |
| IPI0039356; IPI0039356; | 1.0000  | 3.7000  | 0.0006 | 1.4761 | NaN    | 1.0000   |
| IPI0039354; IPI0039354; | 3.0000  | 30.5000 | 0.0000 | 1.1127 | 0.9731 | 8.0000   |
| IPI0039344; IPI0039344; | 2.0000  | 7.9000  | 0.0000 | 0.7779 | NaN    | 0.0000   |
| IPI0039335; IPI0039335; | 5.0000  | 8.4000  | 0.0000 | 1.0459 | 0.9470 | 4.0000   |
| IPI0039333; IPI0039333; | 29.0000 | 71.8000 | 0.0000 | 0.9967 | 0.9925 | 43.0000  |
| IPI0039316; IPI0039316; | 21.0000 | 55.5000 | 0.0000 | 1.2309 | 0.9980 | 32.0000  |
| IPI0039287; IPI0039287; | 10.0000 | 10.1000 | 0.0000 | 1.0594 | 1.0414 | 15.0000  |
| IPI0039286; IPI0039286; | 8.0000  | 46.9000 | 0.0000 | 1.0386 | 1.0226 | 19.0000  |
| IPI0039279; IPI0039279; | 5.0000  | 26.9000 | 0.0000 | 0.9868 | 1.0542 | 16.0000  |
| IPI0039267; IPI0039267; | 8.0000  | 38.3000 | 0.0000 | 1.1344 | 1.0809 | 18.0000  |
| IPI0039265; IPI0039265; | 16.0000 | 47.6000 | 0.0000 | 1.0853 | 1.0329 | 29.0000  |
| IPI0039259; IPI0039259; | 6.0000  | 25.0000 | 0.0000 | 0.8194 | 0.8917 | 6.0000   |
| IPI0039258; IPI0039258; | 7.0000  | 87.5000 | 0.0000 | 0.9396 | 0.9044 | 23.0000  |

|                        |         |         |        |        |
|------------------------|---------|---------|--------|--------|
| IPI0087008;B0BN79      | 7.8000  | 6.0000  | 0.0000 | 1.1184 |
| IPI0023135;P27653;Q5   | 10.8000 | 10.0000 | 0.0000 | 1.1186 |
| IPI00364286            | 17.1000 | 10.0000 | 0.0000 | 1.1186 |
| IPI0036968;Q4FZS3      | 5.4000  | 14.0000 | 0.0000 | 1.1187 |
| IPI0018858;P40307      | 16.4000 | 3.0000  | 0.0000 | 1.1188 |
| IPI0077645;P33124-2;P  | 2.6000  | 2.0000  | 0.0000 | 1.1190 |
| IPI00950631;IPI0036811 | 1.5000  | 3.0000  | 0.0000 | 1.1190 |
| IPI0095246;O08873      | 2.5000  | 4.0000  | 0.0000 | 1.1191 |
| IPI0021367;P84082;P6   | 22.1000 | 4.0000  | 0.0000 | 1.1193 |
| IPI00369693            | 2.3000  | 2.0000  | 0.0003 | 1.1193 |
| IPI0037003;Q5XIA5      | 3.6000  | 2.0000  | 0.0052 | 1.1193 |
| IPI0023181;P62762;Q5   | 20.4000 | 4.0000  | 0.0000 | 1.1194 |
| IPI0021364;P24368      | 18.5000 | 4.0000  | 0.0000 | 1.1196 |
| IPI0018815;P17425      | 13.1000 | 6.0000  | 0.0000 | 1.1200 |
| IPI00199233;IPI0035871 | 28.0000 | 6.0000  | 0.0000 | 1.1201 |
| IPI0047028;P07335      | 15.5000 | 6.0000  | 0.0000 | 1.1202 |
| IPI0020541;P97521;Q6   | 12.0000 | 4.0000  | 0.0000 | 1.1207 |
| IPI0019512;Q06647      | 15.0000 | 3.0000  | 0.0000 | 1.1208 |
| IPI0021222;P38659      | 16.2000 | 10.0000 | 0.0000 | 1.1211 |
| IPI0047176;Q66H20-2;C  | 7.1000  | 4.0000  | 0.0000 | 1.1214 |
| IPI00362587;IPI0036139 | 6.8000  | 4.0000  | 0.0000 | 1.1215 |
| IPI00193816            | 10.9000 | 6.0000  | 0.0000 | 1.1216 |
| IPI0020066;P12785      | 10.7000 | 27.0000 | 0.0000 | 1.1216 |
| IPI0020140;P20651      | 9.3000  | 5.0000  | 0.0000 | 1.1219 |
| IPI0036498;B2RZD1      | 37.5000 | 3.0000  | 0.0000 | 1.1220 |
| IPI0019862;P35434      | 13.7000 | 2.0000  | 0.0000 | 1.1221 |
| IPI00364693            | 4.2000  | 4.0000  | 0.0000 | 1.1221 |
| IPI00362434            | 9.1000  | 6.0000  | 0.0000 | 1.1222 |
| IPI0055178;P09216;Q6   | 11.4000 | 7.0000  | 0.0000 | 1.1222 |
| IPI0036179;Q498C9      | 8.1000  | 4.0000  | 0.0000 | 1.1224 |
| IPI0020939;O89046;Q6   | 6.0000  | 3.0000  | 0.0002 | 1.1226 |
| IPI00565121;IPI0055888 | 2.9000  | 3.0000  | 0.0000 | 1.1226 |
| IPI0019968;P63086      | 14.8000 | 6.0000  | 0.0000 | 1.1228 |
| IPI00358840;IPI0076583 | 9.3000  | 14.0000 | 0.0000 | 1.1229 |
| IPI0020046;Q09073      | 26.8000 | 10.0000 | 0.0000 | 1.1230 |
| IPI0020877;Q0ZFT2;Q4   | 15.5000 | 3.0000  | 0.0000 | 1.1230 |
| IPI00195228            | 5.3000  | 3.0000  | 0.0000 | 1.1231 |
| IPI0023165;Q63584      | 12.8000 | 3.0000  | 0.0000 | 1.1231 |
| IPI00947910;IPI0036658 | 2.2000  | 3.0000  | 0.0000 | 1.1231 |
| IPI0095046;Q62868      | 2.7000  | 4.0000  | 0.0000 | 1.1233 |
| IPI0020527;Q35821      | 5.1000  | 6.0000  | 0.0000 | 1.1235 |
| IPI00371469;IPI0094992 | 4.8000  | 3.0000  | 0.0000 | 1.1235 |

|                       |         |         |        |        |        |          |
|-----------------------|---------|---------|--------|--------|--------|----------|
| IPI0039239;IPI0039239 | 20.0000 | 51.5000 | 0.0000 | 0.9866 | 0.9359 | 65.0000  |
| IPI0039209;IPI0039209 | 6.0000  | 4.6000  | 0.0000 | 1.1197 | 1.0677 | 4.0000   |
| IPI0039199;IPI0039199 | 12.0000 | 46.9000 | 0.0000 | 0.8536 | 0.8061 | 16.0000  |
| IPI0039176;IPI0039176 | 2.0000  | 2.4000  | 0.0002 | 2.0110 | 2.2535 | 3.0000   |
| IPI0039150;IPI0039150 | 3.0000  | 4.2000  | 0.0000 | 1.2497 | NaN    | 1.0000   |
| IPI0039130;IPI0039130 | 84.0000 | 45.6000 | 0.0000 | 1.0128 | 0.9745 | 152.0000 |
| IPI0039115;IPI0039115 | 2.0000  | 5.4000  | 0.0000 | 1.1512 | NaN    | 1.0000   |
| IPI0039113;IPI0039113 | 1.0000  | 2.0000  | 0.0000 | NaN    | 0.8109 | 5.0000   |
| IPI0039108;IPI0039108 | 5.0000  | 13.5000 | 0.0000 | NaN    | 0.9791 | 5.0000   |
| IPI0039103;IPI0039103 | 14.0000 | 16.4000 | 0.0000 | 1.0236 | 0.9394 | 22.0000  |
| IPI0039102;IPI0039102 | 13.0000 | 41.1000 | 0.0000 | 0.9463 | 0.8898 | 22.0000  |
| IPI0039098;IPI0039098 | 9.0000  | 23.0000 | 0.0000 | NaN    | NaN    | 1.0000   |
| IPI0039082;IPI0039082 | 5.0000  | 57.1000 | 0.0000 | 0.9864 | 1.2247 | 16.0000  |
| IPI0039064;IPI0039064 | 21.0000 | 52.9000 | 0.0000 | 0.9386 | 0.9375 | 33.0000  |
| IPI0039059;IPI0039059 | 6.0000  | 12.1000 | 0.0000 | 1.0313 | 0.8874 | 3.0000   |
| IPI0039036;IPI0039036 | 2.0000  | 38.9000 | 0.0000 | 0.9518 | 1.3027 | 2.0000   |
| IPI0039023;IPI0039023 | 2.0000  | 5.0000  | 0.0000 | 0.9604 | NaN    | 1.0000   |
| IPI0039021;IPI0039021 | 10.0000 | 29.5000 | 0.0000 | 0.8269 | 0.9761 | 21.0000  |
| IPI0039021;IPI0039021 | 9.0000  | 32.2000 | 0.0000 | 0.8702 | 0.9873 | 9.0000   |
| IPI0039008;IPI0039008 | 6.0000  | 39.4000 | 0.0000 | 1.0396 | 1.0097 | 28.0000  |
| IPI0038996;IPI0038996 | 3.0000  | 6.5000  | 0.0000 | NaN    | NaN    | 1.0000   |
| IPI0038983;IPI0038983 | 14.0000 | 44.9000 | 0.0000 | 0.9021 | 0.9888 | 36.0000  |
| IPI0038975;IPI0038975 | 17.0000 | 18.9000 | 0.0000 | 0.9984 | 0.9784 | 24.0000  |
| IPI0038974;IPI0038974 | 20.0000 | 27.5000 | 0.0000 | 1.2501 | 1.2993 | 3.0000   |
| IPI0038961;IPI0038961 | 4.0000  | 8.4000  | 0.0000 | 0.8084 | NaN    | 0.0000   |
| IPI0038950;IPI0038950 | 2.0000  | 7.0000  | 0.0001 | NaN    | 1.4860 | 2.0000   |
| IPI0038941;IPI0038941 | 3.0000  | 12.5000 | 0.0000 | 1.0022 | 1.3089 | 2.0000   |
| IPI0038937;IPI0038937 | 2.0000  | 4.3000  | 0.0000 | 0.9481 | 0.9246 | 4.0000   |
| IPI0038924;IPI0038924 | 1.0000  | 1.4000  | 0.0010 | 1.0359 | NaN    | 1.0000   |
| IPI0038923;IPI0038923 | 5.0000  | 65.5000 | 0.0000 | 0.9792 | 1.0051 | 17.0000  |
| IPI0038915;IPI0038915 | 8.0000  | 83.7000 | 0.0000 | 1.0239 | 1.0350 | 29.0000  |
| IPI0038875;IPI0038875 | 18.0000 | 26.3000 | 0.0000 | 1.0480 | 0.9930 | 20.0000  |
| IPI0038859;IPI0038859 | 4.0000  | 29.2000 | 0.0000 | 0.5254 | 0.6846 | 4.0000   |
| IPI0038845;IPI0038845 | 4.0000  | 4.6000  | 0.0000 | 0.8691 | 0.7224 | 3.0000   |
| IPI0038845;IPI0038845 | 12.0000 | 64.3000 | 0.0000 | 0.6808 | 0.5715 | 2.0000   |
| IPI0038831;IPI0038831 | 7.0000  | 22.5000 | 0.0000 | 1.0034 | 0.8469 | 8.0000   |
| IPI0038831;IPI0038831 | 2.0000  | 1.1000  | 0.0001 | 1.1939 | NaN    | 0.0000   |
| IPI0038828;IPI0038828 | 10.0000 | 63.9000 | 0.0000 | NaN    | 0.8473 | 3.0000   |
| IPI0038824;IPI0038824 | 11.0000 | 32.0000 | 0.0000 | 0.9796 | 0.9558 | 14.0000  |
| IPI0038822;IPI0038822 | 3.0000  | 18.7000 | 0.0000 | 1.2446 | 0.9780 | 7.0000   |
| IPI0038820;IPI0038820 | 15.0000 | 35.6000 | 0.0000 | 1.0211 | 1.0205 | 49.0000  |
| IPI0038810;IPI0038810 | 3.0000  | 46.9000 | 0.0000 | 0.9890 | 0.9288 | 7.0000   |

|                        |  |         |         |        |        |
|------------------------|--|---------|---------|--------|--------|
| IPI00360426            |  | 3.0000  | 2.0000  | 0.0002 | 1.1237 |
| IPI0078204 Q8CH84      |  | 14.9000 | 7.0000  | 0.0000 | 1.1241 |
| IPI0021341 B5DEQ4      |  | 7.6000  | 2.0000  | 0.0037 | 1.1243 |
| IPI00365749            |  | 3.3000  | 3.0000  | 0.0000 | 1.1244 |
| IPI0023126 O35244      |  | 10.7000 | 2.0000  | 0.0000 | 1.1245 |
| IPI0020509 Q91V33      |  | 4.5000  | 3.0000  | 0.0000 | 1.1246 |
| IPI0020437 Q00981      |  | 24.2000 | 5.0000  | 0.0000 | 1.1247 |
| IPI0021000 Q63525      |  | 17.2000 | 6.0000  | 0.0000 | 1.1248 |
| IPI0041121 P83871;B4   |  | 13.6000 | 2.0000  | 0.0053 | 1.1248 |
| IPI0087056 B2RYQ5      |  | 17.9000 | 2.0000  | 0.0000 | 1.1249 |
| IPI00367998            |  | 2.0000  | 2.0000  | 0.0009 | 1.1249 |
| IPI0095156 Q9Z330-1;C  |  | 3.4000  | 5.0000  | 0.0000 | 1.1251 |
| IPI0089677 Q9ET34      |  | 4.1000  | 5.0000  | 0.0000 | 1.1252 |
| IPI0023094 Q9EPB1      |  | 6.6000  | 3.0000  | 0.0000 | 1.1254 |
| IPI0077819 Q62956-1;C  |  | 1.6000  | 2.0000  | 0.0001 | 1.1255 |
| IPI0036642 Q5PQJ6      |  | 14.6000 | 4.0000  | 0.0000 | 1.1257 |
| IPI0021050 O35547      |  | 5.7000  | 4.0000  | 0.0000 | 1.1258 |
| IPI0039265 Q9Z2F5;Q6   |  | 10.9000 | 6.0000  | 0.0000 | 1.1258 |
| IPI0078222 Q7TQ77      |  | 11.1000 | 7.0000  | 0.0000 | 1.1258 |
| IPI00193547            |  | 25.6000 | 4.0000  | 0.0000 | 1.1260 |
| IPI0020551 Q9JLA3      |  | 6.1000  | 10.0000 | 0.0000 | 1.1261 |
| IPI0095235 B3DMA1      |  | 8.7000  | 11.0000 | 0.0000 | 1.1261 |
| IPI00369913            |  | 6.8000  | 5.0000  | 0.0000 | 1.1261 |
| IPI0020553 Q925D5      |  | 0.5000  | 2.0000  | 0.0329 | 1.1264 |
| IPI0078025 Q920J4      |  | 6.6000  | 2.0000  | 0.0000 | 1.1265 |
| IPI0047157 Q68FY0      |  | 10.8000 | 6.0000  | 0.0000 | 1.1265 |
| IPI0041775 Q75Q39      |  | 15.6000 | 11.0000 | 0.0000 | 1.1266 |
| IPI00368911            |  | 11.0000 | 7.0000  | 0.0000 | 1.1268 |
| IPI00952157            |  | 6.3000  | 8.0000  | 0.0000 | 1.1268 |
| IPI0095073 Q5X178      |  | 6.7000  | 7.0000  | 0.0000 | 1.1270 |
| IPI0095159 P04905;B6   |  | 13.2000 | 3.0000  | 0.0000 | 1.1272 |
| IPI0036404 Q5U214      |  | 6.0000  | 2.0000  | 0.0000 | 1.1272 |
| IPI0055518 Q08163      |  | 6.1000  | 3.0000  | 0.0000 | 1.1272 |
| IPI0023111 P07171      |  | 14.6000 | 4.0000  | 0.0000 | 1.1273 |
| IPI00366934            |  | 1.3000  | 2.0000  | 0.0000 | 1.1273 |
| IPI0039103 Q8VHU1      |  | 15.1000 | 16.0000 | 0.0000 | 1.1273 |
| IPI00360592            |  | 1.1000  | 2.0000  | 0.0009 | 1.1275 |
| IPI00361437;IPI0039264 |  | 3.7000  | 3.0000  | 0.0000 | 1.1275 |
| IPI00779779;IPI005694  |  | 26.2000 | 25.0000 | 0.0000 | 1.1277 |
| IPI0021547 P24587      |  | 12.3000 | 7.0000  | 0.0000 | 1.1279 |
| IPI0021177 Q63716      |  | 27.1000 | 6.0000  | 0.0000 | 1.1280 |
| IPI00764384            |  | 11.0000 | 2.0000  | 0.0000 | 1.1281 |

|                       |  |         |         |        |        |        |          |
|-----------------------|--|---------|---------|--------|--------|--------|----------|
| IPI0038801 IPI0038801 |  | 22.0000 | 55.1000 | 0.0000 | 1.0126 | 1.0063 | 67.0000  |
| IPI0038800 IPI0038800 |  | 3.0000  | 29.9000 | 0.0000 | NaN    | 1.2402 | 5.0000   |
| IPI0038788 IPI0038788 |  | 14.0000 | 7.4000  | 0.0000 | 1.2344 | 0.9568 | 10.0000  |
| IPI0038786 IPI0038786 |  | 54.0000 | 69.6000 | 0.0000 | 0.9721 | 0.9695 | 136.0000 |
| IPI0038785 IPI0038785 |  | 16.0000 | 19.7000 | 0.0000 | 1.0205 | 1.0337 | 37.0000  |
| IPI0038777 IPI0038777 |  | 22.0000 | 90.2000 | 0.0000 | 1.0199 | 1.0248 | 172.0000 |
| IPI0038770 IPI0038770 |  | 10.0000 | 49.1000 | 0.0000 | 1.0484 | 1.0074 | 24.0000  |
| IPI0038769 IPI0038769 |  | 1.0000  | 15.0000 | 0.0002 | 0.8719 | NaN    | 1.0000   |
| IPI0038237 IPI0038237 |  | 16.0000 | 51.5000 | 0.0000 | 0.9397 | 1.1839 | 42.0000  |
| IPI0038232 IPI0038232 |  | 9.0000  | 11.9000 | 0.0000 | 1.0275 | 0.9709 | 15.0000  |
| IPI0038231 IPI0038231 |  | 7.0000  | 48.8000 | 0.0000 | 1.1340 | 1.0407 | 29.0000  |
| IPI0038226 IPI0038226 |  | 1.0000  | 8.2000  | 0.0003 | 1.0717 | NaN    | 0.0000   |
| IPI0038224 IPI0038224 |  | 3.0000  | 2.4000  | 0.0000 | 0.7849 | 1.0986 | 3.0000   |
| IPI0038223 IPI0038223 |  | 28.0000 | 37.2000 | 0.0000 | 0.8448 | 0.8791 | 118.0000 |
| IPI0038222 IPI0038222 |  | 4.0000  | 5.9000  | 0.0000 | 0.7800 | 0.6829 | 10.0000  |
| IPI0038221 IPI0038221 |  | 2.0000  | 18.4000 | 0.0003 | NaN    | 0.8805 | 2.0000   |
| IPI0038221 IPI0038221 |  | 2.0000  | 3.0000  | 0.0000 | 1.0493 | 1.0540 | 4.0000   |
| IPI0038221 IPI0038221 |  | 3.0000  | 19.6000 | 0.0000 | 1.3491 | 1.0561 | 8.0000   |
| IPI0038221 IPI0038221 |  | 2.0000  | 2.3000  | 0.0000 | NaN    | NaN    | 1.0000   |
| IPI0038219 IPI0038219 |  | 3.0000  | 15.3000 | 0.0000 | 0.7477 | 0.9173 | 2.0000   |
| IPI0038219 IPI0038219 |  | 8.0000  | 18.8000 | 0.0000 | 1.0631 | 1.0415 | 11.0000  |
| IPI0038219 IPI0038219 |  | 1.0000  | 2.3000  | 0.0012 | NaN    | NaN    | 1.0000   |
| IPI0038218 IPI0038218 |  | 2.0000  | 1.3000  | 0.0000 | NaN    | 0.7679 | 3.0000   |
| IPI0038218 IPI0038218 |  | 14.0000 | 52.9000 | 0.0000 | 1.1052 | 0.8933 | 36.0000  |
| IPI0038216 IPI0038216 |  | 4.0000  | 15.7000 | 0.0000 | 0.9087 | 0.9582 | 7.0000   |
| IPI0038215 IPI0038215 |  | 2.0000  | 11.8000 | 0.0000 | 0.8273 | 0.8956 | 9.0000   |
| IPI0038212 IPI0038212 |  | 7.0000  | 11.2000 | 0.0000 | 1.1865 | 1.0597 | 11.0000  |
| IPI0038212 IPI0038212 |  | 7.0000  | 13.7000 | 0.0000 | 0.8444 | 0.9948 | 8.0000   |
| IPI0038206 IPI0038206 |  | 7.0000  | 41.5000 | 0.0000 | 0.7576 | 0.9728 | 17.0000  |
| IPI0038206 IPI0038206 |  | 3.0000  | 4.0000  | 0.0000 | 1.1113 | 0.9952 | 4.0000   |
| IPI0037375 IPI0037375 |  | 2.0000  | 19.9000 | 0.0002 | NaN    | 2.7501 | 3.0000   |
| IPI0037372 IPI0037372 |  | 1.0000  | 3.3000  | 0.0008 | NaN    | NaN    | 1.0000   |
| IPI0037372 IPI0037372 |  | 31.0000 | 37.9000 | 0.0000 | 0.9979 | 0.9743 | 49.0000  |
| IPI0037371 IPI0037371 |  | 7.0000  | 31.2000 | 0.0000 | 1.2082 | 1.0465 | 16.0000  |
| IPI0037368 IPI0037368 |  | 4.0000  | 5.5000  | 0.0000 | 1.0096 | 0.9927 | 2.0000   |
| IPI0037367 IPI0037367 |  | 9.0000  | 32.3000 | 0.0000 | 0.9806 | 0.9674 | 8.0000   |
| IPI0037366 IPI0037366 |  | 6.0000  | 29.6000 | 0.0000 | 1.1347 | 0.9607 | 8.0000   |
| IPI0037365 IPI0037365 |  | 2.0000  | 4.2000  | 0.0000 | NaN    | NaN    | 0.0000   |
| IPI0037365 IPI0037365 |  | 12.0000 | 27.8000 | 0.0000 | 1.1143 | 0.9202 | 11.0000  |
| IPI0037364 IPI0037364 |  | 10.0000 | 19.9000 | 0.0000 | 0.8124 | 0.6439 | 9.0000   |
| IPI0037361 IPI0037361 |  | 4.0000  | 4.2000  | 0.0000 | 1.7520 | 3.9028 | 2.0000   |
| IPI0037359 IPI0037359 |  | 31.0000 | 50.4000 | 0.0000 | 1.0202 | 0.9084 | 82.0000  |

|             |            |         |         |        |        |
|-------------|------------|---------|---------|--------|--------|
| IPI0021335  | B5DF70     | 5.1000  | 3.0000  | 0.0000 | 1.1284 |
| IPI0021529  | Q6MG60     | 11.2000 | 3.0000  | 0.0000 | 1.1286 |
| IPI0037323  | Q4V8A7     | 3.3000  | 3.0000  | 0.0000 | 1.1286 |
| IPI0056544  | O5012-1;C  | 10.8000 | 7.0000  | 0.0000 | 1.1287 |
| IPI0036450  | Q4AEF8     | 8.8000  | 7.0000  | 0.0000 | 1.1287 |
| IPI0019771  | P04642;B5  | 18.4000 | 7.0000  | 0.0000 | 1.1292 |
| IPI0037116  | Q5M808     | 10.2000 | 2.0000  | 0.0000 | 1.1293 |
| IPI0021534  | Q5RK10     | 10.1000 | 7.0000  | 0.0000 | 1.1294 |
| IPI0018850  | P61805     | 17.7000 | 2.0000  | 0.0000 | 1.1297 |
| IPI0038824  | Q07009;Q6  | 5.3000  | 4.0000  | 0.0000 | 1.1299 |
| IPI00764057 | IPI005679  | 11.4000 | 12.0000 | 0.0000 | 1.1299 |
| IPI0020088  | Q9WUD9;C   | 10.9000 | 6.0000  | 0.0000 | 1.1306 |
| IPI0035803  | Q66HF1     | 14.3000 | 12.0000 | 0.0000 | 1.1307 |
| IPI0076739  | Q9QVC8     | 9.5000  | 6.0000  | 0.0000 | 1.1307 |
| IPI00569353 | IPI0076425 | 6.1000  | 3.0000  | 0.0000 | 1.1307 |
| IPI0023196  | P84083     | 27.8000 | 5.0000  | 0.0000 | 1.1310 |
| IPI0036520  | Q4V8B7     | 7.0000  | 2.0000  | 0.0004 | 1.1310 |
| IPI0076522  | B1WBV6;Q   | 3.3000  | 2.0000  | 0.0002 | 1.1311 |
| IPI00767794 | IPI0095143 | 7.6000  | 7.0000  | 0.0000 | 1.1311 |
| IPI00782137 | IPI0036425 | 2.4000  | 5.0000  | 0.0000 | 1.1312 |
| IPI0047165  | Q641Z2     | 3.7000  | 2.0000  | 0.0000 | 1.1315 |
| IPI0019158  | Q66HA6     | 13.4000 | 3.0000  | 0.0000 | 1.1316 |
| IPI00200368 | IPI0094810 | 10.0000 | 2.0000  | 0.0000 | 1.1316 |
| IPI0023086  | P82471;Q4  | 9.2000  | 5.0000  | 0.0000 | 1.1318 |
| IPI0021082  | Q9QUR2-1;  | 8.4000  | 4.0000  | 0.0000 | 1.1320 |
| IPI00361541 | IPI0076345 | 9.4000  | 12.0000 | 0.0000 | 1.1320 |
| IPI0023129  | P63004     | 8.3000  | 3.0000  | 0.0000 | 1.1321 |
| IPI0018830  | Q6P7Q4     | 7.6000  | 2.0000  | 0.0175 | 1.1323 |
| IPI0019191  | Q5XIH3     | 3.9000  | 2.0000  | 0.0034 | 1.1329 |
| IPI00365611 | IPI0076616 | 1.7000  | 4.0000  | 0.0000 | 1.1332 |
| IPI0019138  | Q9ES21     | 8.0000  | 5.0000  | 0.0000 | 1.1333 |
| IPI00569334 | IPI0091126 | 4.8000  | 7.0000  | 0.0000 | 1.1333 |
| IPI00206171 | P21707;Q7  | 12.8000 | 5.0000  | 0.0000 | 1.1335 |
| IPI0023083  | P31399     | 23.0000 | 5.0000  | 0.0000 | 1.1335 |

|            |            |         |         |        |        |        |         |
|------------|------------|---------|---------|--------|--------|--------|---------|
| IPI0037358 | IPI0037358 | 9.0000  | 52.0000 | 0.0000 | 0.9616 | 0.8469 | 9.0000  |
| IPI0037348 | IPI0037348 | 4.0000  | 19.2000 | 0.0000 | 1.5331 | 0.8639 | 3.0000  |
| IPI0037344 | IPI0037344 | 10.0000 | 49.4000 | 0.0000 | 0.9563 | 0.9359 | 5.0000  |
| IPI0037343 | IPI0037343 | 1.0000  | 18.5000 | 0.0001 | NaN    | 0.8635 | 3.0000  |
| IPI0037343 | IPI0037343 | 8.0000  | 43.5000 | 0.0000 | 1.0426 | 1.0541 | 26.0000 |
| IPI0037343 | IPI0037343 | 2.0000  | 12.1000 | 0.0000 | 1.0610 | 0.9509 | 4.0000  |
| IPI0037341 | IPI0037341 | 5.0000  | 12.4000 | 0.0000 | 0.9101 | 0.9421 | 3.0000  |
| IPI0037341 | IPI0037341 | 20.0000 | 43.5000 | 0.0000 | 0.9917 | 0.9986 | 47.0000 |
| IPI0037340 | IPI0037340 | 14.0000 | 40.5000 | 0.0000 | 1.0195 | 1.1125 | 18.0000 |
| IPI0037339 | IPI0037339 | 2.0000  | 3.6000  | 0.0001 | 0.9363 | NaN    | 1.0000  |
| IPI0037336 | IPI0037336 | 4.0000  | 24.6000 | 0.0000 | 0.7966 | 1.2797 | 4.0000  |
| IPI0037333 | IPI0037333 | 1.0000  | 4.0000  | 0.0010 | NaN    | NaN    | 1.0000  |
| IPI0037333 | IPI0037333 | 1.0000  | 4.1000  | 0.0000 | 1.0467 | 1.0425 | 5.0000  |
| IPI0037329 | IPI0037329 | 2.0000  | 11.8000 | 0.0000 | 2.5103 | 2.0430 | 4.0000  |
| IPI0037328 | IPI0037328 | 17.0000 | 44.6000 | 0.0000 | 1.0216 | 1.0081 | 41.0000 |
| IPI0037326 | IPI0037326 | 20.0000 | 33.7000 | 0.0000 | 0.9437 | 1.0010 | 41.0000 |
| IPI0037325 | IPI0037325 | 2.0000  | 8.0000  | 0.0000 | 1.2629 | 1.1407 | 3.0000  |
| IPI0037325 | IPI0037325 | 1.0000  | 2.7000  | 0.0007 | NaN    | NaN    | 0.0000  |
| IPI0037323 | IPI0037323 | 2.0000  | 3.9000  | 0.0001 | 3.3240 | 0.9219 | 3.0000  |
| IPI0037323 | IPI0037323 | 1.0000  | 1.6000  | 0.0000 | NaN    | NaN    | 0.0000  |
| IPI0037323 | IPI0037323 | 6.0000  | 8.8000  | 0.0000 | 0.9867 | 0.9752 | 13.0000 |
| IPI0037321 | IPI0037321 | 18.0000 | 62.4000 | 0.0000 | 0.9625 | 1.0045 | 50.0000 |
| IPI0037321 | IPI0037321 | 4.0000  | 16.7000 | 0.0000 | 0.9234 | 0.9152 | 5.0000  |
| IPI0037319 | IPI0037319 | 2.0000  | 10.1000 | 0.0000 | 0.2435 | NaN    | 1.0000  |
| IPI0037319 | IPI0037319 | 2.0000  | 3.3000  | 0.0000 | 1.0409 | 1.1084 | 4.0000  |
| IPI0037318 | IPI0037318 | 6.0000  | 29.1000 | 0.0000 | 1.9658 | 1.1608 | 4.0000  |
| IPI0037316 | IPI0037316 | 5.0000  | 16.5000 | 0.0000 | 0.9730 | 0.9857 | 6.0000  |
| IPI0037315 | IPI0037315 | 3.0000  | 7.6000  | 0.0000 | 0.8307 | 0.9582 | 3.0000  |
| IPI0037314 | IPI0037314 | 2.0000  | 7.2000  | 0.0000 | NaN    | NaN    | 0.0000  |
| IPI0037313 | IPI0037313 | 6.0000  | 20.5000 | 0.0000 | 1.0876 | 1.0940 | 12.0000 |
| IPI0037310 | IPI0037310 | 1.0000  | 12.7000 | 0.0000 | 1.0415 | 1.0392 | 6.0000  |
| IPI0037310 | IPI0037310 | 7.0000  | 24.7000 | 0.0000 | 1.0665 | 0.9047 | 9.0000  |
| IPI0037310 | IPI0037310 | 2.0000  | 6.7000  | 0.0002 | NaN    | NaN    | 1.0000  |
| IPI0037309 | IPI0037309 | 4.0000  | 11.8000 | 0.0000 | 0.8713 | 0.7285 | 4.0000  |
