# Supplementary material
Source: PubMed Central journal article supplement (PMC4063438)
Supplement: NIHMS589790-supplement-Supplementary_Table_4.pdf [file NIHMS589790-supplement-Supplementary_Table_4.pdf]

**Table S4: Candidate proteins from cytoskeleton, translation, mRNA, membrane, and release protein groups**

**Candidate proteins from Figure 3B: proteins that increased at least 1.2 fold once, with at least 2 experiments showing an increase that are classified as cytoskeletal-related (blue), translation-related (yellow), vesicle release-related (purple), mRNA-related (green) or membrane-related (red). Coloring corresponds to that shown in Figure 3B.**

|                                                                                                                             | classification |
|-----------------------------------------------------------------------------------------------------------------------------|----------------|
| Actc1                                                                                                                       | cytoskeleton   |
| Actin filament-associated protein 1                                                                                         | cytoskeleton   |
| Actin related protein 2/3 complex, subunit 3;Actin related protein 2/3 complex, subunit 3 (Predicted), isoform CRA_b        | cytoskeleton   |
| Actin-depolymerizing factor;Destrin                                                                                         | cytoskeleton   |
| Add2, Isoform 1 of Beta-adducin                                                                                             | cytoskeleton   |
| Anapc2 protein                                                                                                              | cytoskeleton   |
| Arhgef7 protein                                                                                                             | cytoskeleton   |
| Arms                                                                                                                        | cytoskeleton   |
| Arp2/3 complex 16 kDa subunit                                                                                               | cytoskeleton   |
| Astrocytic phosphoprotein PEA-15                                                                                            | cytoskeleton   |
| B-dynamin;D100;Dynamin, brain;Dynamin-1                                                                                     | cytoskeleton   |
| Beta SpIII sigma 1                                                                                                          | cytoskeleton   |
| Calcium/calmodulin-dependent protein kinase type II subunit alpha                                                           | cytoskeleton   |
| Calponin                                                                                                                    | cytoskeleton   |
| catenin, alpha 2                                                                                                            | cytoskeleton   |
| Cofilin, non-muscle isoform;Cofilin-1                                                                                       | cytoskeleton   |
| Collapsin response mediator protein 1                                                                                       | cytoskeleton   |
| Collapsin response mediator protein 2;Dihydropyrimidinase-related protein 2;Turned on after division 64 kDa protein         | cytoskeleton   |
| Conventional kinesin heavy chain                                                                                            | cytoskeleton   |
| Coronin-1A                                                                                                                  | cytoskeleton   |
| Coronin-1B                                                                                                                  | cytoskeleton   |
| Cttn                                                                                                                        | cytoskeleton   |
| Cttnbp2nl                                                                                                                   | cytoskeleton   |
| Cytoplasmic dynein 1 heavy chain 1;Cytoplasmic dynein heavy chain 1;Dynein heavy chain, cytosolic;MAP 1C;Dynein heavy chain | cytoskeleton   |
| Cytoplasmic dynein 1 light intermediate chain 1                                                                             | cytoskeleton   |
| cytoskeleton-associated protein 4                                                                                           | cytoskeleton   |
| dachsous 1                                                                                                                  | cytoskeleton   |
| Developmentally-regulated brain protein                                                                                     | cytoskeleton   |
| Dihydropyrimidinase-related protein 5;UNC33-like phosphoprotein 6;Dihydropyrimidinase-related protein                       | cytoskeleton   |
| doublecortin                                                                                                                | cytoskeleton   |
| Dynamin-1-like protein;Dynamin-like protein                                                                                 | cytoskeleton   |
| Dynein light chain 1, cytoplasmic                                                                                           | cytoskeleton   |

|                                                                                              |              |
|----------------------------------------------------------------------------------------------|--------------|
| EB1 protein family member 3                                                                  | cytoskeleton |
| Ena/VASP-like protein                                                                        | cytoskeleton |
| Ephexin-1;Eph-interacting exchange protein;Neuronal guanine nucleotide exchange factor       | cytoskeleton |
| F-actin-capping protein subunit alpha-1                                                      | cytoskeleton |
| Fascin;Basophilic leukemia expressed sequence 06                                             | cytoskeleton |
| Formin-binding protein 1-like;Transducer of Cdc42-dependent actin assembly protein 1         | cytoskeleton |
| Gamma-adducin                                                                                | cytoskeleton |
| heat shock protein 1                                                                         | cytoskeleton |
| Hematopoietic system regulatory peptide                                                      | cytoskeleton |
| Hepatoma-derived growth factor-related protein                                               | cytoskeleton |
| Actin-related protein 2/3 complex subunit 5-like protein                                     | cytoskeleton |
| Intersectin-1                                                                                | cytoskeleton |
| Isoform 2 of Gephyrin                                                                        | cytoskeleton |
| KARP-1-binding protein 1                                                                     | cytoskeleton |
| Kinesin heavy chain isoform 5C;Kinesin heavy chain neuron-specific 2                         | cytoskeleton |
| Kinesin-2;Kinesin-like protein KIF2A                                                         | cytoskeleton |
| Map1a                                                                                        | cytoskeleton |
| Mark3                                                                                        | cytoskeleton |
| Microtubule-associated protein 2                                                             | cytoskeleton |
| Microtubule-associated protein RP/EB family member 1                                         | cytoskeleton |
| Myosin regulatory light chain 12B                                                            | cytoskeleton |
| Nckap1 protein                                                                               | cytoskeleton |
| Neuronal protein 22;Neuronal protein NP25;Transgelin-3                                       | cytoskeleton |
| Pak1                                                                                         | cytoskeleton |
| plexin A2                                                                                    | cytoskeleton |
| Profilin II;Profilin-2                                                                       | cytoskeleton |
| Protein linking IAP with cytoskeleton 1                                                      | cytoskeleton |
| Protein-L-isoaspartate(D-aspartate) O-methyltransferase                                      | cytoskeleton |
| RAB10, member RAS oncogene family;Ac1075;Ras-related protein Rab-10                          | cytoskeleton |
| Radixin                                                                                      | cytoskeleton |
| RCG53953, isoform CRA_a;Tubulin folding cofactor B;ZH14 protein;Liver cancer-related protein | cytoskeleton |
| Rho GDP-dissociation inhibitor 1;Rho-GDI alpha                                               | cytoskeleton |
| similar to Wiskott-Aldrich syndrome protein-interacting protein                              | cytoskeleton |
| Spectrin alpha chain, non-erythrocytic 1                                                     | cytoskeleton |
| T beta-15;Tubulin beta-2B chain                                                              | cytoskeleton |
| Tbc1d17                                                                                      | cytoskeleton |
| Tpm1                                                                                         | cytoskeleton |

|                                                                                                                                                       |                              |
|-------------------------------------------------------------------------------------------------------------------------------------------------------|------------------------------|
| Trio                                                                                                                                                  | cytoskeleton                 |
| Tropomodulin-2                                                                                                                                        | cytoskeleton                 |
| Ttl12                                                                                                                                                 | cytoskeleton                 |
| Ttn                                                                                                                                                   | cytoskeleton                 |
| Tuba4a                                                                                                                                                | cytoskeleton                 |
| Tubulin beta-2A chain;Tubulin, beta 6                                                                                                                 | cytoskeleton                 |
| Tubulin beta-2C chain                                                                                                                                 | cytoskeleton                 |
| Tyrosine-protein phosphatase non-receptor type 23<br>IPI00561918                                                                                      | cytoskeleton<br>cytoskeleton |
| zyxin                                                                                                                                                 | cytoskeleton                 |
| Ccdc6                                                                                                                                                 | cytoskeleton                 |
| Hemoglobin alpha, adult chain 2                                                                                                                       | cytoskeleton                 |
| Tubulin-specific chaperone D                                                                                                                          | cytoskeleton                 |
| Snx4                                                                                                                                                  | cytoskeleton                 |
| Synapsin II;Synapsin-2                                                                                                                                | cytoskeleton                 |
| 40S ribosomal protein S11;Ribosomal protein S11                                                                                                       | translation                  |
| 40S ribosomal protein S13                                                                                                                             | translation                  |
| 40S ribosomal protein S15;RIG protein;S15 ribosomal protein                                                                                           | translation                  |
| 40S ribosomal protein S24                                                                                                                             | translation                  |
| 40S ribosomal protein S8;Ribosomal protein S8                                                                                                         | translation                  |
| 60 kDa chaperonin;60 kDa heat shock protein, mitochondrial;Chaperonin 60;Heat shock protein 60;HSP-65;Mitochondrial matrix protein P1                 | translation                  |
| 60S acidic ribosomal protein P1                                                                                                                       | translation                  |
| 60S acidic ribosomal protein P2                                                                                                                       | translation                  |
| Alanyl-tRNA synthetase, cytoplasmic;69 kDa protein                                                                                                    | translation                  |
| Arginyl-tRNA--protein transferase 1                                                                                                                   | translation                  |
| Aspartyl-tRNA synthetase                                                                                                                              | translation                  |
| CALBP;Calcium-binding protein 3;Calregulin;Calreticulin;CRP55;Endoplasmic reticulum resident protein 60;HACBP                                         | translation                  |
| CCT-alpha;T-complex protein 1 subunit alpha                                                                                                           | translation                  |
| CCT-delta;T-complex protein 1 subunit delta                                                                                                           | translation                  |
| CCT-gamma;T-complex protein 1 subunit gamma                                                                                                           | translation                  |
| IPI00365169                                                                                                                                           | translation                  |
| D-tyrosyl-tRNA deacylase 1                                                                                                                            | translation                  |
| eeF1A                                                                                                                                                 | translation                  |
| eIF-4D;Eukaryotic initiation factor 5A isoform 1;Eukaryotic translation initiation factor 5A-1;Eukaryotic translation initiation factor 5A isoform II | translation                  |
| eif1b                                                                                                                                                 | translation                  |
| eif2a                                                                                                                                                 | translation                  |

|                                                                                                                                        |             |
|----------------------------------------------------------------------------------------------------------------------------------------|-------------|
| eIF3 p40 subunit;eIF-3-gamma;Eukaryotic translation initiation factor 3 subunit 3;Eukaryotic translation initiation factor 3 subunit H | translation |
| Eif3d;Eif3s7                                                                                                                           | translation |
| Eif3j;Eif3s1                                                                                                                           | translation |
| Eif4g2 protein                                                                                                                         | translation |
| Emc6                                                                                                                                   | translation |
| Epoxide hydrolase 1                                                                                                                    | translation |
| IPI00876578                                                                                                                            | translation |
| ER membrane protein complex subunit 2                                                                                                  | translation |
| Eukaryotic translation initiation factor 4A1;Translation initiation factor 4A, isoform 1                                               | translation |
| Eukaryotic translation initiation factor 4H;Williams-Beuren syndrome chromosomal region 1 protein homolog                              | translation |
| Fkbp1;Fkbp1a                                                                                                                           | translation |
| Guanine nucleotide-binding protein subunit beta-2-like 1                                                                               | translation |
| Guanine nucleotide-binding protein-like 1;Gnl1 protein                                                                                 | translation |
| Heat shock 70 kDa protein 4;Ischemia responsive 94 kDa protein                                                                         | translation |
| Heat shock 70 kDa protein 9;                                                                                                           | translation |
| Hspa4l                                                                                                                                 | translation |
| IPI00870393                                                                                                                            | translation |
| Leucine-rich repeat-containing protein 47                                                                                              | translation |
| methionyl-tRNA synthetase                                                                                                              | translation |
| microsomal gst                                                                                                                         | translation |
| NADPH--cytochrome P450 reductase                                                                                                       | translation |
| neutral alpha-glucosidase AB                                                                                                           | translation |
| Nucleolin                                                                                                                              | translation |
| Ppig                                                                                                                                   | translation |
| Prefoldin subunit 2                                                                                                                    | translation |
| Proliferation-associated 2G4                                                                                                           | translation |
| Protein transport protein Sec61 subunit alpha isoform 1                                                                                | translation |
| Psat1                                                                                                                                  | translation |
| Qars                                                                                                                                   | translation |
| Reticulon-1                                                                                                                            | translation |
| Rpl3                                                                                                                                   | translation |
| Rpl8                                                                                                                                   | translation |
| Rps6                                                                                                                                   | translation |
| Rbp1 ribosome binding protein 1                                                                                                        | translation |
| Serine--tRNA ligase;Seryl-tRNA synthetase, cytoplasmic;Seryl-tRNA(Ser/Sec) synthetase                                                  | translation |
| TCP1-chaperonin cofactor A;Tubulin-folding cofactor A;Tubulin-specific chaperone A                                                     | translation |
| Transmembrane protein 43                                                                                                               | translation |

|                                                             |             |
|-------------------------------------------------------------|-------------|
| TRM1 tRNA methyltransferase 1 homolog (S. cerevisiae)       | translation |
| Tubulin folding cofactor C                                  | translation |
| Ubiquitin-like domain-containing CTD phosphatase 1          | translation |
| Vacuole membrane protein 1                                  | translation |
| Valine--tRNA ligase;Valyl-tRNA synthetase;Vars protein Rcn2 | translation |
| Retinol dehydrogenase 11                                    | translation |
| ADP-ribosylation factor-like 6 interacting protein 1        | translation |
| Deoxyhypusine hydroxylase                                   | translation |
| B-cell receptor-associated protein 31                       | translation |
| Transmembrane emp24 domain-containing protein 7             | translation |
| Adaptin ear-binding coat-associated protein 1               | release     |
| GTP-binding protein Rab-3D                                  | release     |
| Synapsin I;Synapsin-1                                       | release     |
| Synapsin-3                                                  | release     |
| synaptogyrin 3                                              | release     |
| Synaptogyrin-1                                              | release     |
| granulins                                                   | release     |
| Proenkephalin-A                                             | release     |
| Pleiotrophin                                                | release     |
| complexin 2                                                 | release     |
| Protein Elavl3                                              | mRNA        |
| Heterogeneous nuclear ribonucleoprotein R                   | mRNA        |
| Calcium-regulated heat stable protein 1                     | mRNA        |
| Paraspeckle component 1                                     | mRNA        |
| TROVE domain family, member 2                               | mRNA        |
| <a href="#">U12-type spliceosomal complex</a>               | mRNA        |
| Non-POU domain-containing octamer-binding protein           | mRNA        |
| LSM5 homolog                                                | mRNA        |
| RQCD1                                                       | mRNA        |
| NOP58 ribonucleoprotein                                     | mRNA        |
| Spliceosome RNA helicase Bat1;                              | mRNA        |
| Cleavage and polyadenylation specificity factor subunit 7   | mRNA        |
| Small nuclear ribonucleoprotein D2                          | mRNA        |
| GTP-binding protein 1                                       | mRNA        |
| PrPf8                                                       | mRNA        |
| Sf3b2                                                       | mRNA        |

|                                                                                                                                                                                                       |                    |
|-------------------------------------------------------------------------------------------------------------------------------------------------------------------------------------------------------|--------------------|
| Srpk2 SRSF                                                                                                                                                                                            | mRNA               |
| Ddx23 protein                                                                                                                                                                                         | mRNA               |
| CELF1                                                                                                                                                                                                 | mRNA               |
| Splicing factor, arginine/serine-rich 7                                                                                                                                                               | mRNA               |
| Ddx5;rCG_35034                                                                                                                                                                                        | mRNA               |
| U2surp                                                                                                                                                                                                | mRNA               |
| Ascc3l1 protein                                                                                                                                                                                       | mRNA<br>11/20/2013 |
| Ppih                                                                                                                                                                                                  | mRNA               |
| Rbmx1                                                                                                                                                                                                 | mRNA               |
| Snrpf                                                                                                                                                                                                 | mRNA               |
| Sfrs1                                                                                                                                                                                                 | mRNA               |
| Citrate hydro-lyase;Cytoplasmic aconitate hydratase;Iron regulatory protein 1;Iron-responsive element-binding protein 1                                                                               | mRNA               |
| Pum2                                                                                                                                                                                                  | mRNA               |
| 99 kDa protein;98 kDa protein;DIS3 mitotic control homolog (S. cerevisiae)-like 2                                                                                                                     | mRNA               |
| Cleavage and polyadenylation specificity factor subunit 6                                                                                                                                             | mRNA               |
| 4F2 cell-surface antigen heavy chain                                                                                                                                                                  | membrane           |
| Activated leukocyte cell adhesion molecule                                                                                                                                                            | membrane           |
| Atad1                                                                                                                                                                                                 | membrane           |
| BDNF/NT-3 growth factors receptor;GP145-TrkB/GP95-TrkB;Neurotrophic tyrosine kinase receptor type 2;TrkB tyrosine kinase;GP145-TrkC;Neurotrophic tyrosine kinase receptor type 3;TrkC tyrosine kinase | membrane           |
| Cell adhesion molecule 3                                                                                                                                                                              | membrane           |
| Cell cycle exit and neuronal differentiation protein 1                                                                                                                                                | membrane           |
| Dlg3                                                                                                                                                                                                  | membrane           |
| Ephrin-B1                                                                                                                                                                                             | membrane           |
| Epidermal growth factor receptor                                                                                                                                                                      | membrane           |
| Fxyd6                                                                                                                                                                                                 | membrane           |
| Gamma-aminobutyric acid receptor subunit beta-3                                                                                                                                                       | membrane           |
| Igsf3                                                                                                                                                                                                 | membrane           |
| Itfg1                                                                                                                                                                                                 | membrane           |
| LOC683667 protein                                                                                                                                                                                     | membrane           |
| Membrane magnesium transporter 1;Transmembrane protein 32                                                                                                                                             | membrane           |
| Ncam1                                                                                                                                                                                                 | membrane           |
| Netrin receptor DCC                                                                                                                                                                                   | membrane           |
| Neuronal membrane glycoprotein M6-b                                                                                                                                                                   | membrane           |
| Neuroplastin                                                                                                                                                                                          | membrane           |
| Neutral amino acid transporter ASCT1                                                                                                                                                                  | membrane           |

|                                                                           |          |
|---------------------------------------------------------------------------|----------|
| Nlgn2                                                                     | membrane |
| nodal modulator 1                                                         | membrane |
| Opioid growth factor receptor                                             | membrane |
| Plexin B2                                                                 | membrane |
| Polyposis locus protein 1 homolog;Receptor expression-enhancing protein 5 | membrane |
| PPFIA3                                                                    | membrane |
| Sec61a2                                                                   | membrane |
| Transferrin receptor protein 1                                            | membrane |
| Transmembrane 9 superfamily member 4                                      | membrane |
| Vacuolar proton pump subunit C 1;V-type proton ATPase subunit C 1         | membrane |
| Vesicular inhibitory amino acid transporter                               | membrane |
| Vta1                                                                      | membrane |

**Medium stringency candidate proteins: proteins that increased at least 1.2 fold once, with all measured experiments showing an increase (2/2 or 3/3) that are classified as cytoskeletal-related (blue), translation-related (yellow), vesicle release-related (purple), mRNA-related (green) or membrane-related (red).**

**Coloring corresponds to that shown in Figure 3B.**

|                                                                                                       | <b>classification</b> |
|-------------------------------------------------------------------------------------------------------|-----------------------|
| Collapsin response mediator protein 1                                                                 | cytoskeleton          |
| Tropomodulin-2                                                                                        | cytoskeleton          |
| Calcium/calmodulin-dependent protein kinase type II subunit alpha                                     | cytoskeleton          |
| Add2, Isoform 1 of Beta-adducin                                                                       | cytoskeleton          |
| Kinesin heavy chain isoform 5C;Kinesin heavy chain neuron-specific 2                                  | cytoskeleton          |
| Actc1                                                                                                 | cytoskeleton          |
| Dynein light chain 1, cytoplasmic                                                                     | cytoskeleton          |
| Protein linking IAP with cytoskeleton 1                                                               | cytoskeleton          |
| Calponin                                                                                              | cytoskeleton          |
| Actin filament-associated protein 1                                                                   | cytoskeleton          |
| Mark3                                                                                                 | cytoskeleton          |
| Gamma-adducin                                                                                         | cytoskeleton          |
| Coronin-1A                                                                                            | cytoskeleton          |
| Neuronal protein 22;Neuronal protein NP25;Transgelin-3                                                | cytoskeleton          |
| Microtubule-associated protein RP/EB family member 1                                                  | cytoskeleton          |
| Cytoplasmic dynein 1 light intermediate chain 1                                                       | cytoskeleton          |
| Isoform 2 of Gephyrin                                                                                 | cytoskeleton          |
| Hematopoietic system regulatory peptide                                                               | cytoskeleton          |
| Microtubule-associated protein 2                                                                      | cytoskeleton          |
| Developmentally-regulated brain protein                                                               | cytoskeleton          |
| Dihydropyrimidinase-related protein 5;UNC33-like phosphoprotein 6;Dihydropyrimidinase-related protein | cytoskeleton          |
| EB1 protein family member 3                                                                           | cytoskeleton          |
| Ttll12                                                                                                | cytoskeleton          |
| Tuba4a                                                                                                | cytoskeleton          |
| plexin A2                                                                                             | cytoskeleton          |
| RCG53953, isoform CRA_a;Tubulin folding cofactor B;ZH14 protein;Liver cancer-related protein          | cytoskeleton          |
| Tbc1d17                                                                                               | cytoskeleton          |
| Kinesin-2;Kinesin-like protein KIF2A                                                                  | cytoskeleton          |
| Cttnbp2nl                                                                                             | cytoskeleton          |
| Anapc2 protein                                                                                        | cytoskeleton          |
| Tpm1                                                                                                  | cytoskeleton          |
| Tubulin beta-2C chain                                                                                 | cytoskeleton          |
| Myosin regulatory light chain 12B                                                                     | cytoskeleton          |
| Intersectin-1                                                                                         | cytoskeleton          |



|                                                                                                                                                       |              |
|-------------------------------------------------------------------------------------------------------------------------------------------------------|--------------|
| Astrocytic phosphoprotein PEA-15                                                                                                                      | cytoskeleton |
| Protein-L-isoaspartate(D-aspartate) O-methyltransferase                                                                                               | cytoskeleton |
| Cttn                                                                                                                                                  | cytoskeleton |
| IPI00561918                                                                                                                                           | cytoskeleton |
| Actin-related protein 2/3 complex subunit 5-like protein                                                                                              | cytoskeleton |
| similar to Wiskott-Aldrich syndrome protein-interacting protein                                                                                       | cytoskeleton |
| heat shock protein 1                                                                                                                                  | cytoskeleton |
| Trio                                                                                                                                                  | cytoskeleton |
| Actin related protein 2/3 complex, subunit 3;Actin related protein 2/3 complex, subunit 3 (Predicted), isoform CRA_b                                  | cytoskeleton |
| Tyrosine-protein phosphatase non-receptor type 23                                                                                                     | cytoskeleton |
| F-actin-capping protein subunit alpha-1                                                                                                               | cytoskeleton |
| Collapsin response mediator protein 2;Dihydropyrimidinase-related protein 2;Turned on after division 64 kDa protein                                   | cytoskeleton |
| catenin, alpha 2                                                                                                                                      | cytoskeleton |
| doublecortin                                                                                                                                          | cytoskeleton |
| Arms                                                                                                                                                  | cytoskeleton |
| Cofilin, non-muscle isoform;Cofilin-1                                                                                                                 | cytoskeleton |
| Snx4                                                                                                                                                  | cytoskeleton |
| Ttn                                                                                                                                                   | cytoskeleton |
| Spectrin alpha chain, non-erythrocytic 1                                                                                                              | cytoskeleton |
| 40S ribosomal protein S8;Ribosomal protein S8                                                                                                         | translation  |
| Qars                                                                                                                                                  | translation  |
| CALBP;Calcium-binding protein 3;Calregulin;Calreticulin;CRP55;Endoplasmic reticulum resident protein 60;HACBP                                         | translation  |
| eif2a                                                                                                                                                 | translation  |
| Ppig                                                                                                                                                  | translation  |
| Emc6                                                                                                                                                  | translation  |
| eif1b                                                                                                                                                 | translation  |
| 60S acidic ribosomal protein P1                                                                                                                       | translation  |
| neutral alpha-glucosidase AB                                                                                                                          | translation  |
| Prefoldin subunit 2                                                                                                                                   | translation  |
| microsomal gst                                                                                                                                        | translation  |
| Tubulin folding cofactor C                                                                                                                            | translation  |
| Epoxide hydrolase 1                                                                                                                                   | translation  |
| Vacuole membrane protein 1                                                                                                                            | translation  |
| eIF-4D;Eukaryotic initiation factor 5A isoform 1;Eukaryotic translation initiation factor 5A-1;Eukaryotic translation initiation factor 5A isoform II | translation  |
| Reticulon-1                                                                                                                                           | translation  |
| Guanine nucleotide-binding protein-like 1;Gnl1 protein                                                                                                | translation  |
| Guanine nucleotide-binding protein subunit beta-2-like 1                                                                                              | translation  |
| NADPH-cytochrome P450 reductase                                                                                                                       | translation  |

|                                                                                                                                       |             |
|---------------------------------------------------------------------------------------------------------------------------------------|-------------|
| Protein transport protein Sec61 subunit alpha isoform 1                                                                               | translation |
| Fkbp1;Fkbp1a                                                                                                                          | translation |
| Nucleolin                                                                                                                             | translation |
| 60 kDa chaperonin;60 kDa heat shock protein, mitochondrial;Chaperonin 60;Heat shock protein 60;HSP-65;Mitochondrial matrix protein P1 | translation |
| Transmembrane protein 43                                                                                                              | translation |
| Alanyl-tRNA synthetase, cytoplasmic;69 kDa protein                                                                                    | translation |
| Eif3j;Eif3s1                                                                                                                          | translation |
| IPI00365169                                                                                                                           | translation |
| ER membrane protein complex subunit 2                                                                                                 | translation |
| Eif3d;Eif3s7                                                                                                                          | translation |
| Eukaryotic translation initiation factor 4H;Williams-Beuren syndrome chromosomal region 1 protein homolog                             | translation |
| Arginyl-tRNA--protein transferase 1                                                                                                   | translation |
| Proliferation-associated 2G4                                                                                                          | translation |
| TRM1 tRNA methyltransferase 1 homolog (S. cerevisiae)                                                                                 | translation |
| Hspa4l                                                                                                                                | translation |
| Ubiquitin-like domain-containing CTD phosphatase 1                                                                                    | translation |
| Valine--tRNA ligase;Valyl-tRNA synthetase;Vars protein                                                                                | translation |
| Serine--tRNA ligase;Seryl-tRNA synthetase, cytoplasmic;Seryl-tRNA(Ser/Sec) synthetase                                                 | translation |
| Heat shock 70 kDa protein 4;Ischemia responsive 94 kDa protein                                                                        | translation |
| Rpl3                                                                                                                                  | translation |
| TCP1-chaperonin cofactor A;Tubulin-folding cofactor A;Tubulin-specific chaperone A                                                    | translation |
| Leucine-rich repeat-containing protein 47                                                                                             | translation |
| 40S ribosomal protein S13                                                                                                             | translation |
| Rrbp1 ribosome binding protein 1                                                                                                      | translation |
| IPI00870393                                                                                                                           | translation |
| IPI00876578                                                                                                                           | translation |
| Eif4g2 protein                                                                                                                        | translation |
| 40S ribosomal protein S11;Ribosomal protein S11                                                                                       | translation |
| Psat1                                                                                                                                 | translation |
| Synapsin I;Synapsin-1                                                                                                                 | release     |
| Synaptogyrin-1                                                                                                                        | release     |
| Synapsin-3                                                                                                                            | release     |
| granulins                                                                                                                             | release     |
| Proenkephalin-A                                                                                                                       | release     |
| Pleiotrophin                                                                                                                          | release     |
| complexin 2                                                                                                                           | release     |
| Cell cycle exit and neuronal differentiation protein 1                                                                                | membrane    |
| Cell adhesion molecule 3                                                                                                              | membrane    |
| Netrin receptor DCC                                                                                                                   | membrane    |

|                                                                                                                                                                     |          |
|---------------------------------------------------------------------------------------------------------------------------------------------------------------------|----------|
| Activated leukocyte cell adhesion molecule                                                                                                                          | membrane |
| Neuronal membrane glycoprotein M6-b                                                                                                                                 | membrane |
| Fxyd6                                                                                                                                                               | membrane |
| Nlgn2                                                                                                                                                               | membrane |
| Ephrin-B1                                                                                                                                                           | membrane |
| BDNF/NT-3 growth factors receptor;GP145-TrkB/GP95-TrkB;Neurotrophic tyrosine kinase receptor type 2;TrkB tyrosine kinase;GP145-TrkC;Neurotrophic tyrosine kinase re | membrane |
| Epidermal growth factor receptor                                                                                                                                    | membrane |
| Vacuolar proton pump subunit C 1;V-type proton ATPase subunit C 1                                                                                                   | membrane |
| Opioid growth factor receptor                                                                                                                                       | membrane |
| Membrane magnesium transporter 1;Transmembrane protein 32                                                                                                           | membrane |
| Vesicular inhibitory amino acid transporter                                                                                                                         | membrane |
| Neuroplastin                                                                                                                                                        | membrane |
| Gamma-aminobutyric acid receptor subunit beta-3                                                                                                                     | membrane |
| Sec61a2                                                                                                                                                             | membrane |
| Transmembrane 9 superfamily member 4                                                                                                                                | membrane |
| Atad1                                                                                                                                                               | membrane |
| Ncam1                                                                                                                                                               | membrane |
| Igsf3                                                                                                                                                               | membrane |
| LOC683667 protein                                                                                                                                                   | membrane |
| Neutral amino acid transporter ASCT1                                                                                                                                | membrane |
| Itfg1                                                                                                                                                               | membrane |
| PPFIA3                                                                                                                                                              | membrane |
| Protein Elavl3                                                                                                                                                      | mRNA     |
| Heterogeneous nuclear ribonucleoprotein R                                                                                                                           | mRNA     |
| Calcium-regulated heat stable protein 1                                                                                                                             | mRNA     |
| U12-type spliceosomal complex                                                                                                                                       | mRNA     |
| Non-POU domain-containing octamer-binding protein                                                                                                                   | mRNA     |
| LSM5 homolog                                                                                                                                                        | mRNA     |
| RQCD1                                                                                                                                                               | mRNA     |
| NOP58 ribonucleoprotein                                                                                                                                             | mRNA     |
| Cleavage and polyadenylation specificity factor subunit 7                                                                                                           | mRNA     |
| PrPf8                                                                                                                                                               | mRNA     |
| Sf3b2                                                                                                                                                               | mRNA     |
| Srpk2 SRSF                                                                                                                                                          | mRNA     |
| CELF1                                                                                                                                                               | mRNA     |
| Ddx5;rCG_35034                                                                                                                                                      | mRNA     |
| U2surp                                                                                                                                                              | mRNA     |
| Ascc3l1 protein                                                                                                                                                     | mRNA     |

|       |      |
|-------|------|
| Ppih  | mRNA |
| Rbmx1 | mRNA |
| Snrf  | mRNA |
| Sfrs1 | mRNA |

**High stringency candidate proteins: proteins that increased at least 1.2 fold in at least 2 experiments that are cytoskeletal-related (blue), translation-related (yellow), vesicle release-related (purple), mRNA-related (green) or membrane-related (red). Coloring corresponds to that shown in Figure 3B.**

|                                                                                                           | classification |
|-----------------------------------------------------------------------------------------------------------|----------------|
| Actc1                                                                                                     | cytoskeleton   |
| Protein linking IAP with cytoskeleton 1                                                                   | cytoskeleton   |
| Gamma-adducin                                                                                             | cytoskeleton   |
| Coronin-1A                                                                                                | cytoskeleton   |
| Hematopoietic system regulatory peptide                                                                   | cytoskeleton   |
| Developmentally-regulated brain protein                                                                   | cytoskeleton   |
| Ttll12                                                                                                    | cytoskeleton   |
| plexin A2                                                                                                 | cytoskeleton   |
| Tbc1d17                                                                                                   | cytoskeleton   |
| Tpm1                                                                                                      | cytoskeleton   |
| Intersectin-1                                                                                             | cytoskeleton   |
| Astrocytic phosphoprotein PEA-15                                                                          | cytoskeleton   |
| Protein-L-isoaspartate(D-aspartate) O-methyltransferase                                                   | cytoskeleton   |
| IPI00561918                                                                                               | cytoskeleton   |
| heat shock protein 1                                                                                      | cytoskeleton   |
| Tyrosine-protein phosphatase non-receptor type 23                                                         | cytoskeleton   |
| Snx4                                                                                                      | cytoskeleton   |
| catenin, alpha 2                                                                                          | cytoskeleton   |
| Ppig                                                                                                      | translation    |
| eif1b                                                                                                     | translation    |
| 60S acidic ribosomal protein P1                                                                           | translation    |
| IPI00365169                                                                                               | translation    |
| ER membrane protein complex subunit 2                                                                     | translation    |
| Eukaryotic translation initiation factor 4H;Williams-Beuren syndrome chromosomal region 1 protein homolog | translation    |
| Rrbp1 ribosome binding protein 1                                                                          | translation    |
| IPI00870393                                                                                               | translation    |
| IPI00876578                                                                                               | translation    |
| Psat1                                                                                                     | translation    |
| Synaptogyrin-1                                                                                            | release        |
| Synapsin-3                                                                                                | release        |
| granulins                                                                                                 | release        |
| Proenkephalin-A                                                                                           | release        |

|                                         |         |
|-----------------------------------------|---------|
| Pleiotrophin                            | release |
| complexin 2                             | release |
| Calcium-regulated heat stable protein 1 | mRNA    |
| LSM5 homolog                            | mRNA    |
| NOP58 ribonucleoprotein                 | mRNA    |
| Srpk2 SRSF                              | mRNA    |
| CELF1                                   | mRNA    |
| U2surp                                  | mRNA    |
| Rbmx1                                   | mRNA    |
| Snrf                                    | mRNA    |
| Nlgn2                                   | membrae |
| Ephrin-B1                               | membrae |

**Proteins measured in the brains of human patients treated with low dose antipsychotics in Chan et al. (2011) Molec Psych.** Proteins detected in common with previously published reports. The direction of change with haloperidol treatment in the 5 hour and 48 hour studies is that which was measured at least 2/3 times. Candidate refers to low stringency candidates noted in Figure 3B and listed in the first tab of this table. Candidate criteria means that the protein met the low stringency candidate criteria but were from a different protein class than is included in the first part of this table. The class is noted.

| <i>Protein name</i> | <i>Reported Change</i>   | <i>5 hour MS Screen</i> | <i>48hrs MS Study</i>                  |
|---------------------|--------------------------|-------------------------|----------------------------------------|
| NCAM1               | increased                | decreased               | decreased                              |
| SNAP91              | increased                | not detected            | decreased                              |
| ST13                | decreased                | increased               | decreased                              |
| HSP90AA1            | decreased                | increased               | variable, decreased to unchanged       |
| SH3GL2              | increased                | decreased               | increased                              |
| GAP43               | increased                | increased               | increased                              |
| GNB4                | increased                | not detected            | increased                              |
| PRDX6               | decreased                | not detected            | increased                              |
| RTN1                | increased                | increased               | increased, candidate                   |
| SYN2                | increased                | not detected            | increased, candidate                   |
| OPA1                | increased                | not detected            | increased, candidate level, metabolism |
| GLUD1               | increased                | not detected            | increased, candidate level, metabolism |
| GNAO1               | increased                | increased               | increased, candidate level, signaling  |
| GNB1                | increased                | not detected            | increased, candidate level, signaling  |
| PDHA1               | increased                | increased               | increased, detected once               |
| RAP2A               | increased                | not detected            | increased, detected once               |
| STX1A               | increased                | not detected            | increased, detected once               |
| NEFM                | decreased                | not detected            | increased, detected once               |
| GAPDH               | decreased                | increased               | not detected                           |
| MARCKS              | increased                | increased               | variable                               |
|                     | Total detected in common | 10                      | 19                                     |

|                              |     |             |
|------------------------------|-----|-------------|
| # detected in same direction | 5   | 13          |
| in common/total              | 0.5 | 0.684210526 |
| # candidate criteria         |     | 6           |



**Proteins measured in rats treated intraperitoneally with haloperidol for 21 days in Ma et al. (2009) J Proteome Research.** Proteins detected in common with previously published reports. The direction of change with haloperidol treatment in the 5 hour and 48 hour studies is that which was measured at least 2/3 times. Candidate refers to low stringency candidates noted in Figure 3B and listed in the first tab of this table. Candidate criteria means that the protein met the low stringency

| <i>Protein name</i> | <i>Reported Change</i> | <i>5 hour MS Screen</i> | <i>48hrs MS Study</i>                              |
|---------------------|------------------------|-------------------------|----------------------------------------------------|
| SOD2                | increased              | not detected            | increased, candidate criteria, metabolism protein  |
| ATP1A1/ATP1A3       | increased              | increased               | increased                                          |
| ATP5B               | increased              | not detected            | increased                                          |
| CAP1                | increased              | not detected            | increased                                          |
| HKI                 | increased              | not detected            | increased                                          |
| MLLT4               | increased              | not detected            | increased                                          |
| VAMP3               | increased              | not detected            | increased                                          |
| VDAC1               | increased              | not detected            | increased                                          |
| AMPH                | increased              | unchanged               | increased                                          |
| MYH10               | increased              | decreased               | increased                                          |
| ACTN4               | increased              | increased               | increased                                          |
| BASP1               | increased              | increased               | increased                                          |
| DNM1                | increased              | decreased               | increased, candidate                               |
| EEF1A2              | increased              | increased               | increased, candidate                               |
| HSPA9               | increased              | increased               | increased, candidate                               |
| MAP2                | increased              | increased               | increased, candidate                               |
| SYN1                | increased              | increased               | increased, candidate                               |
| GNB2L1              | increased              | not detected            | increased, candidate                               |
| TAGLN3              | increased              | not detected            | increased, candidate                               |
| EHD3                | increased              | decreased               | increased, candidate criteria, endocytosis protein |
| MDH2                | increased              | increased               | increased, candidate criteria, metabolism protein  |
| GLUD1               | increased              | not detected            | increased, candidate criteria, metabolism protein  |
| PPP3CB              | increased              | increased               | increased, candidate criteria, signaling protein   |
| Mapt                | increased              | increased               | increased, detected once                           |
| MAPT                | increased              | increased               | increased, detected once                           |
| STXBP1              | increased              | increased               | increased, detected once                           |
| ALDH5A1             | increased              | not detected            | increased, detected once                           |

|        |           |                    |                                           |
|--------|-----------|--------------------|-------------------------------------------|
| JUP    | Increased | increased          | not detected                              |
| SNAP91 | increased | not detected       | variable, increased to decreased          |
| MAPK1  | increased | variable, unchange | decreased                                 |
| ALDOA  | increased | decreased          | decreased                                 |
| CAMKV  | increased | not detected       | variable, unchanged to decreased          |
| IDH3A  | increased | not detected       | variable, increased to decreased          |
| SNCA   | increased | not detected       | variable, decreased to increased          |
| BIN1   | increased | not detected       | variable, unchanged to slightly increased |

|                    |    |    |
|--------------------|----|----|
| Detected in commor | 19 | 34 |
| Same direction     | 13 | 27 |

|              |             |             |
|--------------|-------------|-------------|
| % overlap    | 0.684210526 | 0.794117647 |
| % candidates |             | 0.352941176 |
